# Supplementary material for: Selective methylation of kaempferol via benzylation and deacetylation of kaempferol acetates
Source: publisher site journal article supplement (doi:10.3762/bjoc.11.33), 2015-02-25

**Supporting Information**  
**for**  
**Selective methylation of kaempferol via benzylation**  
**and deacetylation of kaempferol acetates**

Qinggang Mei<sup>1,2,3</sup>, Chun Wang<sup>2</sup>, Weicheng Yuan<sup>1</sup> and Guolin Zhang<sup>\*2</sup>

Address: <sup>1</sup>Chengdu Institute of Organic Chemistry, Chinese Academy of Sciences, Chengdu 610041, China, <sup>2</sup>Chengdu Institute of Biology, Chinese Academy of Sciences, Chengdu 610041, China and <sup>3</sup>University of Chinese Academy of Sciences, Beijing 100049, China

Email: Guolin Zhang\* - zhanggl@cib.ac.cn

\* Corresponding author

Experimental section; NMR and ESI-HRMS spectra of **1–23**; NOESY spectra of **4** and **13**; HMBC spectra of **4, 5, 7, 9, 12, 13, 16, 18, 22** and **23**

| Contents                                                            | Page No. |
|---------------------------------------------------------------------|----------|
| Experimental section                                                | S1–S16   |
| <sup>1</sup> H NMR Spectra of <b>1–23</b>                           | S17–S39  |
| <sup>13</sup> C NMR Spectra of <b>1–23</b>                          | S40–S62  |
| ESI-HRMS Spectra of <b>1–23</b>                                     | S63–S85  |
| NOESY Spectra of <b>4</b> and <b>13</b>                             | S86–S87  |
| HMBC Spectra of <b>4, 5, 7, 9, 12, 13, 16, 18, 22</b> and <b>23</b> | S88–S97  |

## Experimental section

Melting points were determined with an X-6 apparatus and are uncorrected. IR spectra were recorded on a Perkin-Elmer Spectrum One spectrometer in KBr disks. NMR spectra, including NOESY and  $^1\text{H}$ - $^{13}\text{C}$  HMBC experiments, were carried out at Bruker AC-400 (400 MHz for  $^1\text{H}$  NMR and 100 MHz for  $^{13}\text{C}$  NMR) or Bruker AM-600 (600 MHz for  $^1\text{H}$  NMR and 150 MHz for  $^{13}\text{C}$  NMR) spectrometers in  $\text{CDCl}_3$  or in  $\text{DMSO}-d_6$  using TMS as internal reference at ambient temperature; chemical shifts ( $\delta$ ) and coupling constants ( $J$ ) are given in ppm and Hz, respectively. ESI-HRMS spectra were obtained on a Bruker Bio TOF IIIQ (quadrupole time of flight) mass spectrometer. Analytical TLC was performed on plates precoated with 0.15–0.2 mm of silica gel GF<sub>254</sub> from QOCEC (Qingdao Ocean Chemical Engineering Company, P. R. China). HPLC was equipped with Perkin-Elmer series 200 pump, Perkin-Elmer series UV/Vis detector, 200  $\mu\text{L}$  manual injector, and Phenomenex C<sub>18</sub> column (10 mm  $\times$  250 mm, 10  $\mu\text{m}$ ). Reagents were analytical reagent grade and were used without further purification unless otherwise noted.  $\text{CH}_2\text{Cl}_2$  and NMP were freshly distilled over  $\text{CaH}_2$ .

### 3,4',5,7-Tetra-O-acetylkaempferol (**1**) [1]

Acetic anhydride (60 mL) was added to the solution of dry kaempferol (4 g, 13.99 mmol) in pyridine (30 mL), and the mixture was allowed to stand overnight at ambient temperature. After complete conversion monitored by TLC, the solvent was removed and the residue was poured into crushed ice with vigorous stirring. The abundant resulting off-white precipitate was recovered by filtration and washed with cold water and then methanol, and dried in air. The crude product was crystallized from acetone/95% ethanol (1:3) to afford **1** (5.95 g, 94%) as colorless needles, mp: 183–184  $^\circ\text{C}$ . IR ( $\text{cm}^{-1}$ ): 1775, 1661, 1631, 1503, 1476, 1435, 1370, 1186, 1158, 1122,

1081, 1013.  $^1\text{H}$  NMR (600 MHz,  $\text{CDCl}_3$ ):  $\delta$  = 7.84 (d,  $J$  = 8.7 Hz, 2H), 7.32 (d,  $J$  = 2.1 Hz, 1H), 7.26 (d,  $J$  = 8.7 Hz, 2H), 6.87 (d,  $J$  = 2.1 Hz, 1H), 2.43 (s, 3H), 2.34 (s, 6H), 2.32 (s, 3H).  $^{13}\text{C}$  NMR (150 MHz,  $\text{CDCl}_3$ ):  $\delta$  = 170.24, 169.39, 168.99, 167.98, 167.91, 157.10, 154.91, 154.38, 153.08, 150.61, 134.08, 129.76, 127.16, 122.21, 114.97, 113.97, 109.10, 21.30, 21.18, 20.71. ESI-HRMS: 477.0807  $[\text{M}+\text{Na}]^+$  (calcd. for  $\text{C}_{23}\text{H}_{18}\text{O}_{10}\text{Na}$ : 477.0792).

### **3,4',5-Tri-*O*-acetylkaempferol (2)**

This was carried out according to the reported procedure [2]. To a solution of kaempferol tetraacetate (**1**) (1g, 2.2 mmol) in NMP (5 mL) was added imidazole (60 mg, 0.88 mmol) followed by thiophenol (0.31 mL, 3.08 mmol) at 0 °C. The mixture was stirred at 0 °C for 11 h and then diluted with EtOAc (100 mL), and washed successively with 1 M HCl (aq) (50 mL), water (40 mL) and brine (40 mL). The organic layer was dried over  $\text{MgSO}_4$  and concentrated under reduced pressure. The residue was purified over silica gel column using acetone/petroleum ether (1:2) as solvents to give **2** (825 mg, 91%) as white powder, mp: 136-138 °C. IR ( $\text{cm}^{-1}$ ): 3348, 2935, 1765, 1728, 1636, 1501, 1453, 1371, 1249, 1201, 1179, 1077.  $^1\text{H}$  NMR (400 MHz,  $\text{DMSO}-d_6$ ):  $\delta$  = 11.32 (s, 1H), 7.91 (d,  $J$  = 8.8 Hz, 2H), 7.37 (d,  $J$  = 8.8 Hz, 2H), 6.93 (d,  $J$  = 2.3 Hz, 1H), 6.64 (d,  $J$  = 2.3 Hz, 1H), 2.32 (s, 3H), 2.30 (s, 6H).  $^{13}\text{C}$  NMR (100 MHz,  $\text{DMSO}-d_6$ ):  $\delta$  = 169.00, 168.99, 168.79, 167.99, 162.78, 157.61, 153.30, 152.61, 150.22, 132.61, 129.48, 126.64, 122.63, 109.26, 109.04, 100.96, 20.91, 20.90, 20.32. ESI-HRMS: 435.0695  $[\text{M}+\text{Na}]^+$  (calcd. for  $\text{C}_{21}\text{H}_{16}\text{O}_9\text{Na}$ : 435.0687).

### **7-*O*-Methyl-3,4',5-tri-*O*-acetylkaempferol (3) [3]**

A suspension of compound **2** (200 mg, 0.49 mmol), anhydrous  $\text{K}_2\text{CO}_3$  (108 mg, 0.78 mmol) and  $\text{Me}_2\text{SO}_4$  (0.061 mL, 0.64 mmol) in dry acetone (6 mL) was stirred at room

temperature for 12 h. The reaction mixture was diluted with water (10 mL) and extracted with EtOAc (20 mL). The organic layer was washed with brine, dried over  $\text{MgSO}_4$  and concentrated under reduced pressure. The dried residue was purified over silica gel column using acetone/petroleum ether (1:4) as solvents to provide **3** (180 mg, 87%) as white powder, mp: 186-187 °C. IR ( $\text{cm}^{-1}$ ): 2960, 2902, 1763, 1658, 1600, 1494, 1368, 1290, 1202, 1155, 1014.  $^1\text{H}$  NMR (400 MHz,  $\text{CDCl}_3$ ):  $\delta$  = 7.84 (d,  $J$  = 8.8 Hz, 2H), 7.25 (d,  $J$  = 8.8 Hz, 2H), 6.84 (d,  $J$  = 2.4 Hz, 1H), 6.64 (d,  $J$  = 2.4 Hz, 1H), 3.91 (s, 3H), 2.43 (s, 3H), 2.34 (s, 3H), 2.32 (s, 3H).  $^{13}\text{C}$  NMR (150 MHz,  $\text{CDCl}_3$ ):  $\delta$  = 170.27, 169.72, 169.06, 168.15, 163.98, 158.36, 154.30, 152.88, 150.92, 133.87, 129.68, 127.48, 122.15, 111.27, 108.85, 99.03, 56.22, 21.31, 21.27, 20.77. ESI-HRMS: 449.0850  $[\text{M}+\text{Na}]^+$  (calcd. for  $\text{C}_{22}\text{H}_{18}\text{O}_9\text{Na}$ : 449.0843).

#### **7-O-Methylkaempferol (rhamnocitrin) (4) [4]**

The solution of compound **3** (150 mg, 0.35 mmol) in 7.0 M methanilic ammonia (2 mL) was stirred at room temperature for 3 h. The solution was diluted with MeOH (4 mL) and neutralized cautiously with 0.5 M HCl (aq) and then left at room temperature for 12 h. The abundant resulting precipitate was recovered by filtration, washed with water and dried over  $\text{P}_2\text{O}_5$  under vacuum to give **4** (102 mg, 97%) as yellow powder, mp: 172-173 °C. IR ( $\text{cm}^{-1}$ ): 3481, 3274, 2926, 2854, 1609, 1587, 1503, 1415, 1355, 1231, 1164.  $^1\text{H}$  NMR (400 MHz,  $\text{DMSO}-d_6$ ):  $\delta$  = 12.47 (s, 1H, OH-5), 10.14 (s, 1H, OH-4'), 9.51 (s, 1H, OH-3), 8.08 (d,  $J$  = 8.8 Hz, 2H, H-2',6'), 6.93 (d,  $J$  = 8.8 Hz, 2H, H-3',5'), 6.75 (d,  $J$  = 2.0 Hz, 1H, H-8), 6.35 (d,  $J$  = 2.0 Hz, 1H, H-6), 3.86 (s, 3H,  $\text{OCH}_3$ -7).  $^{13}\text{C}$  NMR (150 MHz,  $\text{DMSO}-d_6$ ):  $\delta$  = 176.04 (C-4), 164.91 (C-7), 160.38 (C-5), 159.32 (C-4'), 156.11 (C-9), 147.28 (C-2), 135.96 (C-3), 129.58 (C-2',6'), 121.58 (C-1'), 115.46 (C-3',5'), 104.04 (C-10), 97.46 (C-6), 92.03 (C-8), 56.02 ( $\text{OCH}_3$ -7). ESI-HRMS: 299.0568  $[\text{M}-\text{H}]^-$  (calcd. for  $\text{C}_{16}\text{H}_{11}\text{O}_6$ : 299.0561).



#### **4',7,-Di-O-methylkaempferol (5) [5]**

A mixture of compound **2** (166 mg, 0.4 mmol), dimethyl sulfate (0.12 mL, 1.25 mmol), anhydrous K<sub>2</sub>CO<sub>3</sub> (199 mg, 1.44 mmol) and acetone (6 mL) was refluxed for 2 h. Then methanol (2 mL) was added to the mixture and the reaction continued for 24 h. Excess of solvent was removed under reduced pressure and ice water (5 mL) was poured onto the residue with stirring. The mixture was acidified cautiously with 0.5 M HCl (aq) until pH = 5 and extracted with CHCl<sub>3</sub> (8 mL). The organic extract was washed with saturated NaHCO<sub>3</sub> solution, brine and dried over Mg<sub>2</sub>SO<sub>4</sub>, filtered and evaporated under reduced pressure. Crystallization of the dried residue from acetone/petroleum (1:4) ether afforded **5** (113 mg, 90%) as yellow needles, mp: 157-158 °C. IR (cm<sup>-1</sup>): 3317, 2926, 2851, 1660, 1596, 1506, 1311, 1260, 1167, 1031. <sup>1</sup>H NMR (400 MHz, DMSO-*d*<sub>6</sub>): δ = 12.44 (s, 1H, OH-5), 9.67 (s, 1H, OH-3), 8.18 (d, *J* = 9.1 Hz, 2H, H-2',6'), 7.13 (d, *J* = 9.1 Hz, 2H, H-3',5'), 6.78 (d, *J* = 2.2 Hz, 1H, H-8), 6.37 (d, *J* = 2.2 Hz, 1H, H-6), 3.87 (s, 3H, OCH<sub>3</sub>-7), 3.85 (s, 3H, OCH<sub>3</sub>-4'). <sup>13</sup>C NMR (150 MHz, DMSO-*d*<sub>6</sub>): δ = 176.13 (C-4), 164.98 (C-7), 160.59 (C-4'), 160.37 (C-5), 156.15 (C-9), 146.69 (C-2), 136.35 (C-3), 129.38 (C-2',6'), 123.15 (C-1'), 114.04 (C-3',5'), 104.08 (C-10), 97.49 (C-6), 92.06 (C-8), 56.02 (OCH<sub>3</sub>-7), 55.37 (OCH<sub>3</sub>-4'). ESI-HRMS: 315.0873 [M+H]<sup>+</sup> (calcd. for C<sub>17</sub>H<sub>15</sub>O<sub>6</sub>: 315.0863).

#### **4'-O-Acetylkaempferol (6)**

To a solution of compound **2** (251 mg, 0.61 mmol) in CH<sub>2</sub>Cl<sub>2</sub> (1 mL) and CH<sub>3</sub>CN (3 mL) was added anhydrous AlCl<sub>3</sub> (201 mg, 1.52 mmol). The mixture was refluxed for 3 h. After cooling down to room temperature, 1 M HCl (aq) (3 mL) was added and the mixture was stirred further for 1 h. The reaction mixture was diluted with CHCl<sub>3</sub> and the pH was adjusted to 4–5 with saturated NaHCO<sub>3</sub> solution. After evaporation of the

organic layer, the amorphous residue was purified over silica gel column using EtOAc/CH<sub>2</sub>Cl<sub>2</sub>/petroleum ether (1:3:6) as solvents to yield **5** (178 mg, 89%) as yellow needles, mp: 164-165 °C. IR (cm<sup>-1</sup>): 3403, 3298, 2928, 1722, 1653, 1623, 1603, 1504, 1370, 1313, 1245, 1168. <sup>1</sup>H NMR (400 MHz, DMSO-*d*<sub>6</sub>): δ = 12.36 (s, 1H), 10.87 (s, 1H), 9.76 (s, 1H), 8.20 (d, *J* = 8.9 Hz, 2H), 7.33 (d, *J* = 2.0 Hz, 2H), 6.47 (d, *J* = 2.0 Hz, 1H), 6.22 (d, *J* = 2.0 Hz, 1H), 2.31 (s, 3H). <sup>13</sup>C NMR (100 MHz, DMSO-*d*<sub>6</sub>): δ = 176.30, 169.09, 164.28, 160.80, 156.41, 151.43, 145.21, 137.07, 128.97, 128.53, 122.11, 103.27, 98.38, 93.64, 20.92. ESI-HRMS: 327.0510 [M-H]<sup>-</sup> (calcd. for C<sub>17</sub>H<sub>11</sub>O<sub>7</sub>: 327.0510).

### **3,7-Di-O-methylkaempferol (kumatakenin) (7) [6]**

Methylation of compound **6** (151 mg, 0.46 mmol) with dimethyl sulfate (0.115 mL, 1.2 mmol) and anhydrous K<sub>2</sub>CO<sub>3</sub> (190 mg, 1.38 mmol) in dry acetone (6 mL) was carried out at room temperature for 12 h. The mixture was diluted with water (15 mL) and extracted with EtOAc (20 mL). The organic layer was washed with brine, dried over MgSO<sub>4</sub> and concentrated under reduced pressure. Without purification, the dried residue was stirred with 7.0 M methanolic ammonia (3 mL) for 3 h. The precipitate formed was filtered off and crystallized from acetone/petroleum ether (1:2) to provide **7** (121 mg, 84%) as yellow crystals, mp: 228-230 °C. IR (cm<sup>-1</sup>): 3410, 3261, 2928, 2854, 1658, 1602, 1498, 1346, 1287, 1170. <sup>1</sup>H NMR (400 MHz, DMSO-*d*<sub>6</sub>): δ = 12.67 (s, 1H, OH-5), 10.32 (s, 1H, OH-4'), 7.98 (d, *J* = 8.9 Hz, 2H, H-2',6'), 6.95 (d, *J* = 8.9 Hz, 2H, H-3',5'), 6.75 (d, *J* = 2.0 Hz, 1H, H-8), 6.37 (d, *J* = 2.0 Hz, 1H, H-6), 3.86 (s, 3H, OCH<sub>3</sub>-7), 3.80 (s, 3H, OCH<sub>3</sub>-3). <sup>13</sup>C NMR (100 MHz, DMSO-*d*<sub>6</sub>): δ = 178.11 (C-4), 165.16 (C-7), 160.96 (C-5), 160.32 (C-4'), 156.34 (C-9), 155.99 (C-2), 137.86 (C-3), 130.25 (C-2',6'), 120.50 (C-1'), 115.70 (C-3',5'), 105.22 (C-10), 97.81 (C-6), 92.39 (C-8), 59.74 (OCH<sub>3</sub>-3), 56.12 (OCH<sub>3</sub>-7). ESI-HRMS: 315.0862 [M+H]<sup>+</sup> (calcd. for

C<sub>17</sub>H<sub>15</sub>O<sub>6</sub>: 315.0863).

### 7-O-Benzyl-3,4',5-tri-O-acetylkaempferol (8)

A mixture of kaempferol tetraacetate (**1**) (2.5 g, 5.51 mmol), potassium iodide (450 mg, 2.71 mmol), benzyl bromide (1.25 mL, 10.59 mmol), anhydrous K<sub>2</sub>CO<sub>3</sub> (1925 mg, 13.95 mmol) and dry acetone (80 mL) was refluxed for 24 h. The filtered solution was concentrated to give an amorphous solid, which was crystallized from absolute ethanol to give **8** as white crystals (2.35 g, 85%), mp: 163-164 °C. IR (cm<sup>-1</sup>): 1771, 1636, 1621, 1505, 1442, 1369, 1290, 1193, 1170, 1077, 1017. <sup>1</sup>H NMR (600 MHz, CDCl<sub>3</sub>): δ = 7.83 (d, *J* = 8.8 Hz, 2H), 7.43–7.35 (m, 5H), 7.24 (d, *J* = 8.8 Hz, 2H), 6.90 (d, *J* = 2.3 Hz, 1H), 6.71 (d, *J* = 2.3 Hz, 1H), 5.16 (s, 2H), 2.43 (s, 3H), 2.34 (s, 3H), 2.31 (s, 3H). <sup>13</sup>C NMR (150 MHz, CDCl<sub>3</sub>): δ = 170.23, 169.70, 169.05, 168.13, 163.02, 158.30, 154.33, 152.88, 150.96, 135.37, 133.88, 129.69, 128.99, 128.74, 127.70, 127.46, 122.15, 111.45, 109.41, 100.00, 71.01, 21.31, 21.28, 20.76. ESI-HRMS: 525.1152 [M+Na]<sup>+</sup> (calcd. for C<sub>28</sub>H<sub>22</sub>O<sub>9</sub>Na: 525.1156).

### 7-O-Benzyl-4'-O-acetylkaempferol (9)

To a solution of compound **8** (300 mg, 0.6 mmol) in CH<sub>2</sub>Cl<sub>2</sub> (1 mL) and CH<sub>3</sub>CN (3 mL) was added anhydrous AlCl<sub>3</sub> (201 mg, 1.52 mmol). The mixture was refluxed for 3 h. After cooling down to room temperature, 1 M HCl (aq) (3 mL) was added and the mixture was stirred further for 1 h. The reaction mixture was diluted with CHCl<sub>3</sub> and the pH was adjusted to 4–5 with saturated NaHCO<sub>3</sub> solution. After evaporation of the organic layer, the residue was purified over silica gel column using acetone/petroleum ether (1:4) as solvents to yield compound **9** (216 mg, 86%) as pale yellow powder, mp: 172-173 °C. IR (cm<sup>-1</sup>): 3324, 2925, 2856, 1756, 1647, 1623, 1598, 1503, 1368, 1308, 1212, 1171. <sup>1</sup>H NMR (400 MHz, DMSO-*d*<sub>6</sub>): δ = 12.35 (s, 1H, OH-5), 9.91 (s, 1H,

OH-3), 8.23 (d,  $J = 8.9$  Hz, 2H, H-2',6'), 7.48 (d,  $J = 7.3$  Hz, 2H, H-2'',6''), 7.42 (t,  $J = 7.3$  Hz, 2H, H-3'',5''), 7.36 (overlapped, 3H, H-4'',3',5'), 6.89 (d,  $J = 2.1$  Hz, 1H, H-8), 6.47 (d,  $J = 2.1$  Hz, 1H, H-6), 5.24 (s, 2H, H-7''), 2.31 (s, 3H, CH<sub>3</sub>COO-4'). <sup>13</sup>C NMR (100 MHz, DMSO-*d*<sub>6</sub>):  $\delta = 176.45$  (C-4), 169.04 (CH<sub>3</sub>COO-4'), 164.21 (C-7), 160.48 (C-5), 156.27 (C-9), 151.53 (C-4'), 145.65 (C-2), 137.40 (C-3), 136.13 (C-1''), 128.99 (C-2',6'), 128.56 (C-3'',5''), 128.43 (C-1'), 128.16 (C-4''), 127.88 (C-2'',6''), 122.13 (C-3',5'), 104.37 (C-10), 98.20 (C-6), 93.06 (C-8), 70.02 (C-7''), 20.90 (CH<sub>3</sub>COO-4'). ESI-HRMS: 419.1115 [M+H]<sup>+</sup> (calcd. for C<sub>24</sub>H<sub>19</sub>O<sub>7</sub>: 419.1125).

### 3-O-Methyl-7-O-benzyl-4'-O-acetylkaempferol (10)

A suspension of compound **9** (201 mg, 0.48 mmol), anhydrous K<sub>2</sub>CO<sub>3</sub> (105 mg, 0.76 mmol) and Me<sub>2</sub>SO<sub>4</sub> (0.06 mL, 0.63 mmol) in dry acetone (6 mL) was stirred at room temperature for 12 h. The mixture was diluted with water (10 mL), and extracted with EtOAc (20 mL). The organic layer was washed with brine, dried over MgSO<sub>4</sub> and then concentrated. The residue was crystallized from acetone/petroleum ether (1:3) to afford **10** (176 mg, 85%) as yellowish-brown crystals, mp: 115-117 °C. IR (cm<sup>-1</sup>): 3444, 2925, 2853, 1744, 1661, 1609, 1503, 1461, 1384, 1342, 1230, 1171, 1005. <sup>1</sup>H NMR (400 MHz, DMSO-*d*<sub>6</sub>):  $\delta = 12.53$  (s, 1H), 8.09 (d,  $J = 8.7$  Hz, 2H), 7.47 (d,  $J = 7.4$  Hz, 2H), 7.41 (t,  $J = 7.4$  Hz, 2H), 7.35 (t,  $J = 8.5$  Hz, 3H), 6.86 (d,  $J = 1.9$  Hz, 1H), 6.48 (d,  $J = 1.9$  Hz, 1H), 5.23 (s, 2H), 3.84 (s, 3H), 2.32 (s, 3H). <sup>13</sup>C NMR (100 MHz, DMSO-*d*<sub>6</sub>):  $\delta = 178.31$ , 169.02, 164.36, 161.02, 156.46, 154.86, 152.42, 139.01, 136.09, 129.75, 128.57, 128.18, 127.87, 127.49, 122.34, 105.61, 98.60, 93.40, 70.06, 60.08, 20.92. ESI-HRMS: 433.1261 [M+H]<sup>+</sup> (calcd. for C<sub>25</sub>H<sub>21</sub>O<sub>7</sub>: 433.1282).

### 3-O-Methyl-7-O-benzylkaempferol (11)

A solution of compound **10** (152 mg, 0.35 mmol) in 7.0 M methanolic ammonia (3 mL)

was stirred at room temperature for 3 h. The precipitate formed was filtered off and crystallized from acetone/petroleum ether (1:3) to give **11** (132 mg, 96%) as yellow needles, mp: 155-157 °C. IR (cm<sup>-1</sup>): 3421, 2930, 1603, 1494, 1371, 1339, 1287, 1220, 1172. <sup>1</sup>H NMR (400 MHz, DMSO-*d*<sub>6</sub>): δ = 12.67 (s, 1H), 10.30 (s, 1H), 7.97 (d, *J* = 8.9 Hz, 2H), 7.47 (d, *J* = 7.1 Hz, 2H), 7.41 (t, *J* = 7.1 Hz, 2H), 7.35 (t, *J* = 7.1 Hz, 1H), 6.96 (d, *J* = 8.9 Hz, 2H), 6.84 (d, *J* = 2.2 Hz, 1H), 6.46 (d, *J* = 2.2 Hz, 1H), 5.23 (s, 2H), 3.80 (s, 3H). <sup>13</sup>C NMR (100 MHz, DMSO-*d*<sub>6</sub>): δ = 178.05, 164.09, 160.97, 160.30, 156.24, 156.00, 137.85, 136.12, 130.20, 128.54, 128.13, 127.84, 120.46, 115.68, 105.32, 98.39, 93.23, 69.98, 59.70. ESI-HRMS: 389.1036 [M-H]<sup>-</sup> (calcd. for C<sub>23</sub>H<sub>17</sub>O<sub>6</sub>: 389.1031).

### 3-O-Methylkaempferol (**12**) [7]

A mixture of **11** (90 mg, 0.23 mmol), 10% Pd/C (10 mg), MeOH (9 mL) and EtOAc (3 mL) was stirred at ambient temperature under a hydrogen balloon for 5 h. The resulting mixture was filtered off through celite eluting with EtOAc (3 mL). The filtrate was concentrated to give the crude product, which was crystallized from acetone/petroleum ether (1:2) to afford **12** (63 mg, 91%) as pale yellow needles, mp: 237-239 °C. IR (cm<sup>-1</sup>): 3502, 3118, 2925, 2855, 1467, 1606, 1489, 1360, 1308, 1224, 1161. <sup>1</sup>H NMR (400 MHz, DMSO-*d*<sub>6</sub>): δ = 12.69 (s, 1H, OH-5), 10.85 (s, 1H, OH-7), 10.27 (s, 1H, OH-4'), 7.94 (d, *J* = 8.9 Hz, 2H, H-2',6'), 6.94 (d, *J* = 8.9 Hz, 2H, H-3',5'), 6.44 (d, *J* = 2.0 Hz, 1H, H-8), 6.20 (d, *J* = 2.0 Hz, 1H, H-6), 3.78 (s, 3H, OCH<sub>3</sub>-3). <sup>13</sup>C NMR (150 MHz, DMSO-*d*<sub>6</sub>): δ = 177.89 (C-4), 164.10 (C-7), 161.23 (C-5), 160.14 (C-4'), 156.36 (C-9), 155.60 (C-2), 137.59 (C-3), 130.11 (C-2',6'), 120.55 (C-1'), 115.63 (C-3',5'), 104.20 (C-10), 98.55 (C-6), 93.69 (C-8), 59.68 (OCH<sub>3</sub>-3). ESI-HRMS: 299.0563 [M-H]<sup>-</sup> (calcd. for C<sub>16</sub>H<sub>11</sub>O<sub>6</sub>: 299.0561).

### 3-O-Acetyl-7-O-benzylkaempferol (13)

To the solution of compound **8** (300 mg, 0.6 mmol) in acetone (3 mL) and MeOH (1 mL) was added 1 M HCl (aq) (3 mL). The mixture was refluxed for 3.5 h, and then diluted with CHCl<sub>3</sub> (5 mL), neutralized with aqueous NaHCO<sub>3</sub>, and extracted with CHCl<sub>3</sub>. After evaporation of the organic layer, the dried residue was purified over silica gel column using acetone/petroleum ether (1:3) as solvents to provide **13** (205 mg, 82%) as yellow needles, mp: 170-171 °C. IR (cm<sup>-1</sup>): 3313, 2935, 2876, 1781, 1655, 1603, 1583, 1494, 1373, 1339, 1283, 1165. <sup>1</sup>H NMR (600 MHz, DMSO-*d*<sub>6</sub>): δ = 12.19 (s, 1H, OH-5), 10.41 (s, 1H, OH-4'), 7.80 (d, *J* = 8.8 Hz, 2H, H-2',6'), 7.48 (d, *J* = 7.5 Hz, 2H, H-2'',6''), 7.42 (t, *J* = 7.5 Hz, 2H, H-3'',5''), 7.36 (t, *J* = 7.5 Hz, 1H, H-4''), 6.97 (d, *J* = 8.8 Hz, 2H, H-3',5'), 6.90 (d, *J* = 2.0 Hz, 1H, H-8), 6.53 (d, *J* = 2.0 Hz, 1H, H-6), 5.26 (s, 2H, H-7''), 2.34 (s, 3H, CH<sub>3</sub>COO-3). <sup>13</sup>C NMR (150 MHz, DMSO-*d*<sub>6</sub>): δ = 175.07 (C-4), 167.91 (CH<sub>3</sub>COO-3), 164.55 (C-7), 160.85 (C-4'), 160.77 (C-5), 156.49 (C-9), 156.36 (C-2), 136.00 (C-1''), 130.10 (C-2',6'), 129.82 (C-3), 128.52 (C-3'',5''), 128.14 (C-4''), 127.84 (C-2'',6''), 119.27 (C-1'), 115.97 (C-3',5'), 104.57 (C-10), 98.90 (C-6), 93.76 (C-8), 70.10 (C-7''), 20.21 (CH<sub>3</sub>COO-3). ESI-HRMS: 417.0993 [M-H]<sup>-</sup> (calcd. for C<sub>24</sub>H<sub>17</sub>O<sub>7</sub>: 417.0980).

### 3-O-Acetyl-7-O-benzyl-4',5-di-O-methylkaempferol (14)

To a suspension of **13** (171 mg, 0.41 mmol), K<sub>2</sub>CO<sub>3</sub> (206 mg, 1.49 mmol) and acetone (8 mL) was added Me<sub>2</sub>SO<sub>4</sub> (0.11 mL, 1.15 mmol). After the mixture was stirred at 30 °C for 12 h, another batch of Me<sub>2</sub>SO<sub>4</sub> (0.02 mL, 0.2 mmol) was added. After another 12 h at 30 °C, the reaction mixture was diluted with water (20 mL) and extracted with EtOAc (30 mL). After removal of the solvent, the residue obtained was purified over silica gel column using acetone/petroleum ether (1:3) as solvents to

afford compound **14** (168 mg, 92%) as white powder, mp: 94-95 °C. IR (cm<sup>-1</sup>): 2955, 2919, 2851, 1776, 1607, 1467, 1349, 1298, 1258, 1170. <sup>1</sup>H NMR (400 MHz, DMSO-*d*<sub>6</sub>): δ = 7.86 (d, *J* = 9.0 Hz, 2H), 7.51 (d, *J* = 7.1 Hz, 2H), 7.43 (t, *J* = 7.1 Hz, 2H), 7.37 (t, *J* = 7.1 Hz, 1H), 7.14 (d, *J* = 9.0 Hz, 2H), 6.97 (d, *J* = 2.1 Hz, 1H), 6.64 (d, *J* = 2.1 Hz, 1H), 5.26 (s, 2H), 3.85 (s, 3H), 3.84 (s, 3H), 2.30 (s, 3H). <sup>13</sup>C NMR (150 MHz, DMSO-*d*<sub>6</sub>): δ = 169.08, 168.03, 163.22, 161.46, 160.48, 158.39, 152.35, 136.07, 132.65, 129.52, 128.57, 128.23, 128.03, 121.32, 114.51, 107.76, 96.94, 94.17, 70.14, 56.28, 55.50, 20.37. ESI-HRMS: 447.1455 [M+H]<sup>+</sup> (calcd. for C<sub>26</sub>H<sub>23</sub>O<sub>7</sub>: 447.1438).

### 3-O-Acetyl-4',5-di-O-methylkaempferol (**15**)

A mixture of **14** (150 mg, 0.34 mmol), 10% Pd/C (15 mg), MeOH (15 mL) and EtOAc (5 mL) was stirred at ambient temperature under a hydrogen balloon for 5 h. The mixture was filtered off through celite eluting with EtOAc (6 mL). The filtrate was concentrated to give the crude product, which was crystallized from acetone/petroleum ether (1:2) to afford **15** (110 mg, 92%) as off-white crystals, mp: 145-147 °C. IR (cm<sup>-1</sup>): 3263, 2926, 2855, 1730, 1603, 1509, 1459, 1298, 1257, 1175, 1102, 1030. <sup>1</sup>H NMR (400 MHz, DMSO-*d*<sub>6</sub>): δ = 10.86 (s, 1H), 7.82 (d, *J* = 9.0 Hz, 2H), 7.12 (d, *J* = 9.0 Hz, 2H), 6.53 (d, *J* = 2.0 Hz, 1H), 6.41 (d, *J* = 2.0 Hz, 1H), 3.84 (s, 3H), 3.81 (s, 3H), 2.29 (s, 3H). <sup>13</sup>C NMR (150 MHz, DMSO-*d*<sub>6</sub>): δ = 169.39, 168.42, 163.29, 161.58, 161.05, 158.58, 152.39, 132.53, 129.69, 121.59, 114.69, 106.68, 96.83, 95.36, 56.21, 55.67, 20.54. ESI-HRMS: 379.0770 [M+Na]<sup>+</sup> (calcd. for C<sub>19</sub>H<sub>16</sub>O<sub>7</sub>Na: 379.0788).

### 4',5-Di-O-methylkaempferol (**16**) [8]

Compound **15** (100 mg, 0.28 mmol) was stirred with 7.0 M methanolic ammonia (2 mL) at room temperature for 3 h. The precipitate formed was filtered off and crystallized

from acetone/petroleum ether (1:3) to give **16** (83 mg, 94%) as yellowish crystals, mp: 280-282 °C. IR (cm<sup>-1</sup>): 3179, 2934, 2838, 1602, 1563, 1501, 1378, 1297, 1256, 1207, 1183, 1031. <sup>1</sup>H NMR (400 MHz, DMSO-*d*<sub>6</sub>): δ = 10.51 (s, 1H, OH-7), 8.75 (s, 1H, OH-3), 8.09 (d, *J* = 8.9 Hz, 2H, H-2',6'), 7.10 (d, *J* = 8.9 Hz, 2H, H-3',5'), 6.50 (d, *J* = 1.8 Hz, 1H, H-8), 6.36 (d, *J* = 1.8 Hz, 1H, H-6), 3.83 (s, 6H, OCH<sub>3</sub>-5,4'). <sup>13</sup>C NMR (150 MHz, DMSO-*d*<sub>6</sub>): δ = 171.00 (C-4), 162.55 (C-7), 160.57 (C-5), 159.96 (C-4'), 158.04 (C-9), 141.38 (C-2), 137.41 (C-3), 128.61 (C-2',6'), 123.59 (C-1'), 114.03 (C-3',5'), 105.20 (C-10), 95.92 (C-6), 94.76 (C-8), 55.98 (OCH<sub>3</sub>-5 or 4'), 55.31 (OCH<sub>3</sub>-5 or 4'). ESI-HRMS: 315.0852 [M+H]<sup>+</sup> (calcd. for C<sub>17</sub>H<sub>15</sub>O<sub>6</sub>: 315.0863).

### 7-O-Benzyl-4'-O-methylkaempferol (**17**)

The mixture of compound **8** (1 g, 1.99 mmol), dimethyl sulfate (0.29 mL, 3.04 mmol), anhydrous K<sub>2</sub>CO<sub>3</sub> (994 mg, 7.2 mmol) and acetone (27 mL) was refluxed for 2 h. Methanol (9 mL) was added to the mixture and the reaction continued for 24 h. Excess of solvent was removed and ice water (30 mL) was poured onto the obtained residue with stirring. The mixture was neutralized with 0.5 M HCl (aq), and extracted with CHCl<sub>3</sub> (40 mL). After evaporation of solvents, the yellow powder was crystallized from CH<sub>2</sub>Cl<sub>2</sub>/MeOH (1:4) to provide compound **17** (637 mg, 82%) as yellow needles, mp: 168-170 °C. IR (cm<sup>-1</sup>): 3293, 2927, 1652, 1617, 1589, 1501, 1351, 1310, 1260, 1225, 1162, 1091, 1036. <sup>1</sup>H NMR (400 MHz, DMSO-*d*<sub>6</sub>): δ = 12.44 (s, 1H), 9.64 (s, 1H), 8.17 (d, *J* = 9.1 Hz, 2H), 7.48 (d, *J* = 7.1 Hz, 2H), 7.42 (t, *J* = 7.1 Hz, 2H), 7.36 (t, *J* = 7.1 Hz, 1H), 7.13 (d, *J* = 9.1 Hz, 2H), 6.86 (d, *J* = 2.1 Hz, 1H), 6.45 (d, *J* = 2.1 Hz, 1H), 5.24 (s, 2H), 3.85 (s, 3H). <sup>13</sup>C NMR (150 MHz, DMSO-*d*<sub>6</sub>): δ = 176.13, 163.98, 160.62, 160.43, 156.08, 146.76, 136.39, 136.16, 129.39, 128.52, 128.11, 127.83, 123.15, 114.08, 104.22, 98.06, 92.98, 69.97, 55.39. ESI-HRMS: 389.1018 [M-H]<sup>-</sup> (calcd. for C<sub>23</sub>H<sub>17</sub>O<sub>6</sub>: 389.1031).



#### 4'-O-Methylkaempferol (kaempferide) (**18**) [9]

A mixture of **17** (410 mg, 1.05 mmol), 10% Pd/C (45 mg), MeOH (27 mL) and EtOAc (9 mL) was stirred at room temperature under a hydrogen balloon for 5 h. The mixture was filtered off through celite eluting with EtOAc (10 mL). The filtrate was concentrated to give the crude product, which was crystallized from acetone/petroleum ether (1:2) to yield **18** (293 mg, 93%) as yellow crystals, mp: 177-178 °C. IR (cm<sup>-1</sup>): 3445, 3291, 2925, 2854, 1615, 1510, 1374, 1310, 1253, 1172. <sup>1</sup>H NMR (400 MHz, DMSO-*d*<sub>6</sub>): δ = 12.44 (s, 1H, OH-5), 10.83 (s, 1H, OH-7), 9.53 (s, 1H, OH-3), 8.14 (d, *J* = 9.1 Hz, 2H, H-2',6'), 7.11 (d, *J* = 9.1 Hz, 2H, H-3',5'), 6.46 (d, *J* = 2.0 Hz, 1H, H-8), 6.20 (d, *J* = 2.0 Hz, 1H, H-6), 3.84 (s, 3H, OCH<sub>3</sub>-4'). <sup>13</sup>C NMR (150 MHz, DMSO-*d*<sub>6</sub>): δ = 176.01 (C-4), 164.00 (C-7), 160.73 (C-5), 160.50 (C-4'), 156.25 (C-9), 146.28 (C-2), 136.06 (C-3), 129.34 (C-2',6'), 123.27 (C-1'), 114.06 (C-3',5'), 103.10 (C-10), 98.25 (C-6), 93.53 (C-8), 55.37 (OCH<sub>3</sub>-4'). ESI-HRMS: 299.0560 [M-H]<sup>-</sup> (calcd. for C<sub>16</sub>H<sub>11</sub>O<sub>6</sub>: 299.0561).

#### 7-O-Benzylkaempferol (**19**)

The solution of **8** (400 mg, 0.8 mmol) in 7.0 M methanolic ammonia (9 mL) was stirred at room temperature for 3 h. The precipitate formed was filtered off and crystallized from acetone/MeOH (1:4) to give **19** (284 mg, 95%) as yellow crystals, mp: 183-184 °C. IR (cm<sup>-1</sup>): 3436, 2925, 1655, 1605, 1586, 1498, 1351, 1309, 1227, 1172. <sup>1</sup>H NMR (400 MHz, DMSO-*d*<sub>6</sub>): δ = 12.48 (s, 1H), 10.14 (s, 1H), 9.53 (s, 1H), 8.08 (d, *J* = 8.9 Hz, 2H), 7.48 (d, *J* = 7.1 Hz, 2H), 7.42 (t, *J* = 7.1 Hz, 2H), 7.36 (t, *J* = 7.1 Hz, 1H), 6.94 (d, *J* = 8.9 Hz, 2H), 6.84 (d, *J* = 2.1 Hz, 1H), 6.44 (d, *J* = 2.1 Hz, 1H), 5.24 (s, 2H). <sup>13</sup>C NMR (100 MHz, DMSO-*d*<sub>6</sub>): δ = 176.02, 163.89, 160.42, 159.34, 156.02, 147.31, 136.19, 136.01, 129.58, 128.54, 128.13, 127.86, 121.56, 115.47, 104.17, 98.03,

92.91, 69.95. ESI-HRMS: 375.0883 [M-H]<sup>-</sup> (calcd. for C<sub>22</sub>H<sub>15</sub>O<sub>6</sub>: 375.0874).

### **7-O-Benzyl-3,4'-di-O-methylkaempferol (20) [10]**

A suspension of **19** (120 mg, 0.32 mmol), anhydrous K<sub>2</sub>CO<sub>3</sub> (138 mg, 1 mmol) and Me<sub>2</sub>SO<sub>4</sub> (0.08 mL, 0.84 mmol) in dry acetone (5 mL) was stirred for 12 h at room temperature. The mixture was diluted with water (8 mL), neutralized with 0.5 M HCl (aq) and extracted with EtOAc. After evaporation of solvents, the yellow powder was purified over silica gel column using acetone/petroleum ether (1:5) as solvents to provide **20** (112 mg, 87%) as pale yellow granular crystals, mp: 113-114 °C. IR (cm<sup>-1</sup>): 3461, 2928, 1658, 1603, 1497, 1378, 1259, 1204, 1177. <sup>1</sup>H NMR (400 MHz, DMSO-*d*<sub>6</sub>): δ = 12.63 (s, 1H), 8.05 (d, *J* = 9.0 Hz, 2H), 7.47 (d, *J* = 7.1 Hz, 2H), 7.42 (t, *J* = 7.1 Hz, 2H), 7.36 (t, *J* = 7.1 Hz, 1H), 7.15 (d, *J* = 9.0 Hz, 2H), 6.87 (d, *J* = 2.1 Hz, 1H), 6.47 (d, *J* = 2.1 Hz, 1H), 5.24 (s, 2H), 3.87 (s, 3H), 3.81 (s, 3H). <sup>13</sup>C NMR (150 MHz, DMSO-*d*<sub>6</sub>): δ = 178.10, 164.16, 161.46, 160.97, 156.29, 155.60, 138.19, 136.09, 130.04, 128.51, 128.10, 127.81, 122.07, 114.28, 105.39, 98.43, 93.30, 69.99, 59.77, 55.46. ESI-HRMS: 427.1153 [M+Na]<sup>+</sup> (calcd. for C<sub>24</sub>H<sub>20</sub>O<sub>6</sub>Na: 427.1152).

### **7-O-Benzyl-3,4',5-tri-O-methylkaempferol (21) [11]**

The mixture of **19** (120 mg, 0.32 mmol), Me<sub>2</sub>SO<sub>4</sub> (0.11 mL, 1.15 mmol) and K<sub>2</sub>CO<sub>3</sub> (177 mg, 1.28 mmol) in acetone (6 mL) was stirred for 12 h at 30 °C. Another batch of Me<sub>2</sub>SO<sub>4</sub> (0.03 mL, 0.32 mmol) was then added. After another 12 h at 30 °C, the mixture was diluted with water (10 mL) and extracted with EtOAc (20 mL). After evaporation of solvents, the residue was purified over silica gel column using acetone/petroleum ether (1:3) as solvents to provide **21** (127 mg, 95%) as white powder, mp: 133-135 °C. IR (cm<sup>-1</sup>): 2925, 2853, 1628, 1604, 1455, 1348, 1295, 1256, 1211, 1176, 1013. <sup>1</sup>H NMR (400 MHz, CDCl<sub>3</sub>): δ = 8.06 (d, *J* = 9.1 Hz, 2H), 7.48–7.37

(m, 5H), 7.01 (d,  $J = 9.1$  Hz, 2H), 6.59 (d,  $J = 2.0$  Hz, 1H), 6.43 (d,  $J = 2.0$  Hz, 1H), 5.14 (s, 2H), 3.96 (s, 3H), 3.89 (s, 3H), 3.88 (s, 3H).  $^{13}\text{C}$  NMR (150 MHz,  $\text{CDCl}_3$ ):  $\delta = 174.20, 163.06, 161.32, 161.24, 158.91, 152.88, 141.27, 135.90, 129.98, 128.95, 128.62, 127.77, 123.42, 114.07, 109.85, 96.45, 93.55, 70.67, 60.05, 56.57, 55.54$ . ESI-HRMS: 419.1482  $[\text{M}+\text{H}]^+$  (calcd. for  $\text{C}_{25}\text{H}_{23}\text{O}_6$ : 419.1489).

### 3,4'-Di-O-methylkaempferol (**22**) [7]

A mixture of **20** (100 mg, 0.25 mmol), 10% Pd/C (10 mg), MeOH (9 mL) and EtOAc (3 mL) was stirred at room temperature under a hydrogen balloon for 5 h. The mixture was filtered off through celite eluting with EtOAc (4 mL). After concentration of the filtrate, the yellow powder was crystallized from acetone/petroleum ether (1:4) to afford **22** (71 mg, 91%) as pale yellow needles, mp: 216-218 °C. IR ( $\text{cm}^{-1}$ ): 3428, 3111, 2933, 1651, 1607, 1574, 1497, 1365, 1305, 1263, 1223, 1164, 1019.  $^1\text{H}$  NMR (400 MHz,  $\text{DMSO}-d_6$ ):  $\delta = 12.64$  (s, 1H, OH-5), 10.88 (s, 1H, OH-7), 8.02 (d,  $J = 9.0$  Hz, 2H, H-2',6'), 7.13 (d,  $J = 9.0$  Hz, 2H, H-3',5'), 6.46 (d,  $J = 2.0$  Hz, 1H, H-8), 6.21 (d,  $J = 2.0$  Hz, 1H, H-6), 3.86 (s, 3H,  $\text{OCH}_3$ -4'), 3.79 (s, 3H,  $\text{OCH}_3$ -3).  $^{13}\text{C}$  NMR (100 MHz,  $\text{DMSO}-d_6$ ):  $\delta = 177.96$  (C-4), 164.22 (C-7), 161.36 (C-4'), 161.27 (C-5), 156.44 (C-9), 155.24 (C-2), 137.94 (C-3), 130.02 (C-2',6'), 122.20 (C-1'), 114.27 (C-3',5'), 104.29 (C-10), 98.63 (C-6), 93.79 (C-8), 59.79 ( $\text{OCH}_3$ -3), 55.46 ( $\text{OCH}_3$ -4'). ESI-HRMS: 315.0858  $[\text{M}+\text{H}]^+$  (calcd. for  $\text{C}_{17}\text{H}_{15}\text{O}_6$ : 315.0863).

### 3,4',5-Tri-O-methylkaempferol (**23**) [5]

A mixture of **21** (100 mg, 0.24 mmol), 10% Pd/C (10 mg), MeOH (12 mL) and EtOAc (4 mL) was stirred at room temperature under a hydrogen balloon for 5 h. The mixture was filtered off through celite eluting with EtOAc (6 mL). After concentration of the filtrate, the pale green powder was crystallized from acetone/MeOH (1:3) to afford **23**

(70 mg, 89%) as off-white crystals, mp: 151-152 °C. IR (cm<sup>-1</sup>): 3134, 2923, 2852, 1605, 1575, 1470, 1356, 1297, 1256, 1189. <sup>1</sup>H NMR (400 MHz, DMSO-*d*<sub>6</sub>): δ = 10.73 (s, 1H, OH-7), 7.97 (d, *J* = 9.0 Hz, 2H, H-2',6'), 7.11 (d, *J* = 9.0 Hz, 2H, H-3',5'), 6.48 (d, *J* = 2.0 Hz, 1H, H-8), 6.36 (d, *J* = 2.0 Hz, 1H, H-6), 3.84 (s, 3H, OCH<sub>3</sub>-5), 3.81 (s, 3H, OCH<sub>3</sub>-4'), 3.71 (s, 3H, OCH<sub>3</sub>-3). <sup>13</sup>C NMR (100 MHz, DMSO-*d*<sub>6</sub>): δ = 172.09 (C-4), 162.50 (C-7), 160.80 (C-5), 160.74 (C-4'), 158.11 (C-9), 151.51 (C-2), 139.99 (C-3), 129.52 (C-2',6'), 122.63 (C-1'), 114.15 (C-3',5'), 107.42 (C-10), 96.15 (C-6), 94.88 (C-8), 59.28 (OCH<sub>3</sub>-3), 55.90 (OCH<sub>3</sub>-4'), 55.39 (OCH<sub>3</sub>-5). ESI-HRMS: 329.1016 [M+H]<sup>+</sup> (calcd. for C<sub>18</sub>H<sub>17</sub>O<sub>6</sub>: 329.1020).

## References

1. Prawat, H.; Mahidol, C.; Ruchirawat, S.; Prawat, U.; Tuntiwachwuttikul, P.; Tooptakong, U.; Taylor, W. C.; Pakawatchal, C.; Skelton, B. W.; White, A. H. *Phytochemistry* **1995**, *40*, 1167–1173.
2. Kawamura, T.; Hayashi, M.; Mukai, R.; Terao, J.; Nemoto, H. *Synthesis* **2014**, *46*, 170–174.
3. Kimura, Y.; Takido, M.; Takahashi, S.; Kimishima, M. *Yakugaku Zasshi* **1967**, *87*, 440–443.
4. Zhang, X.-F.; Hung, T. M.; Phuong, P. T.; Ngoc, T. M.; Min, B.-S.; Song, K.-S.; Seong, Y. H.; Bae, K.-H. *Arch. Pharm. Res.* **2006**, *29*, 1102–1108.
5. Rossi, M. H.; Yoshida, M.; Maia, J. G. S. *Phytochemistry* **1997**, *45*, 1263–1269.
6. Wang, Y.; Hamburger, M.; Gueho, J.; Hostettmann, K. *Phytochemistry* **1989**, *28*, 2323–2327.
7. Nakatani, N.; Jitoe, A.; Masuda, T.; Yonemori, S. *Agric. Biol. Chem.* **1991**, *55*,

455–460.

8. Kanao, M.; Shimokoriyama, M. *Acta Phytochimica* **1949**, 15, 229–231.
9. Wadher, S. J.; Tapas, A. R.; Yeole, P. G. *Int. J. Chem. Sci.* **2006**, 4, 761–766.
10. Bhrara, S. C.; Jain, A. C.; Seshadri, T. R. *Indian J. Chem.* **1965**, 3, 68–70.
11. Rajagopalan, S.; Rao, P. R.; Rao, K. V.; Seshadri, T. R. *Proc. Indian AS, Sect. A* **1949**, 29A, 9–15.

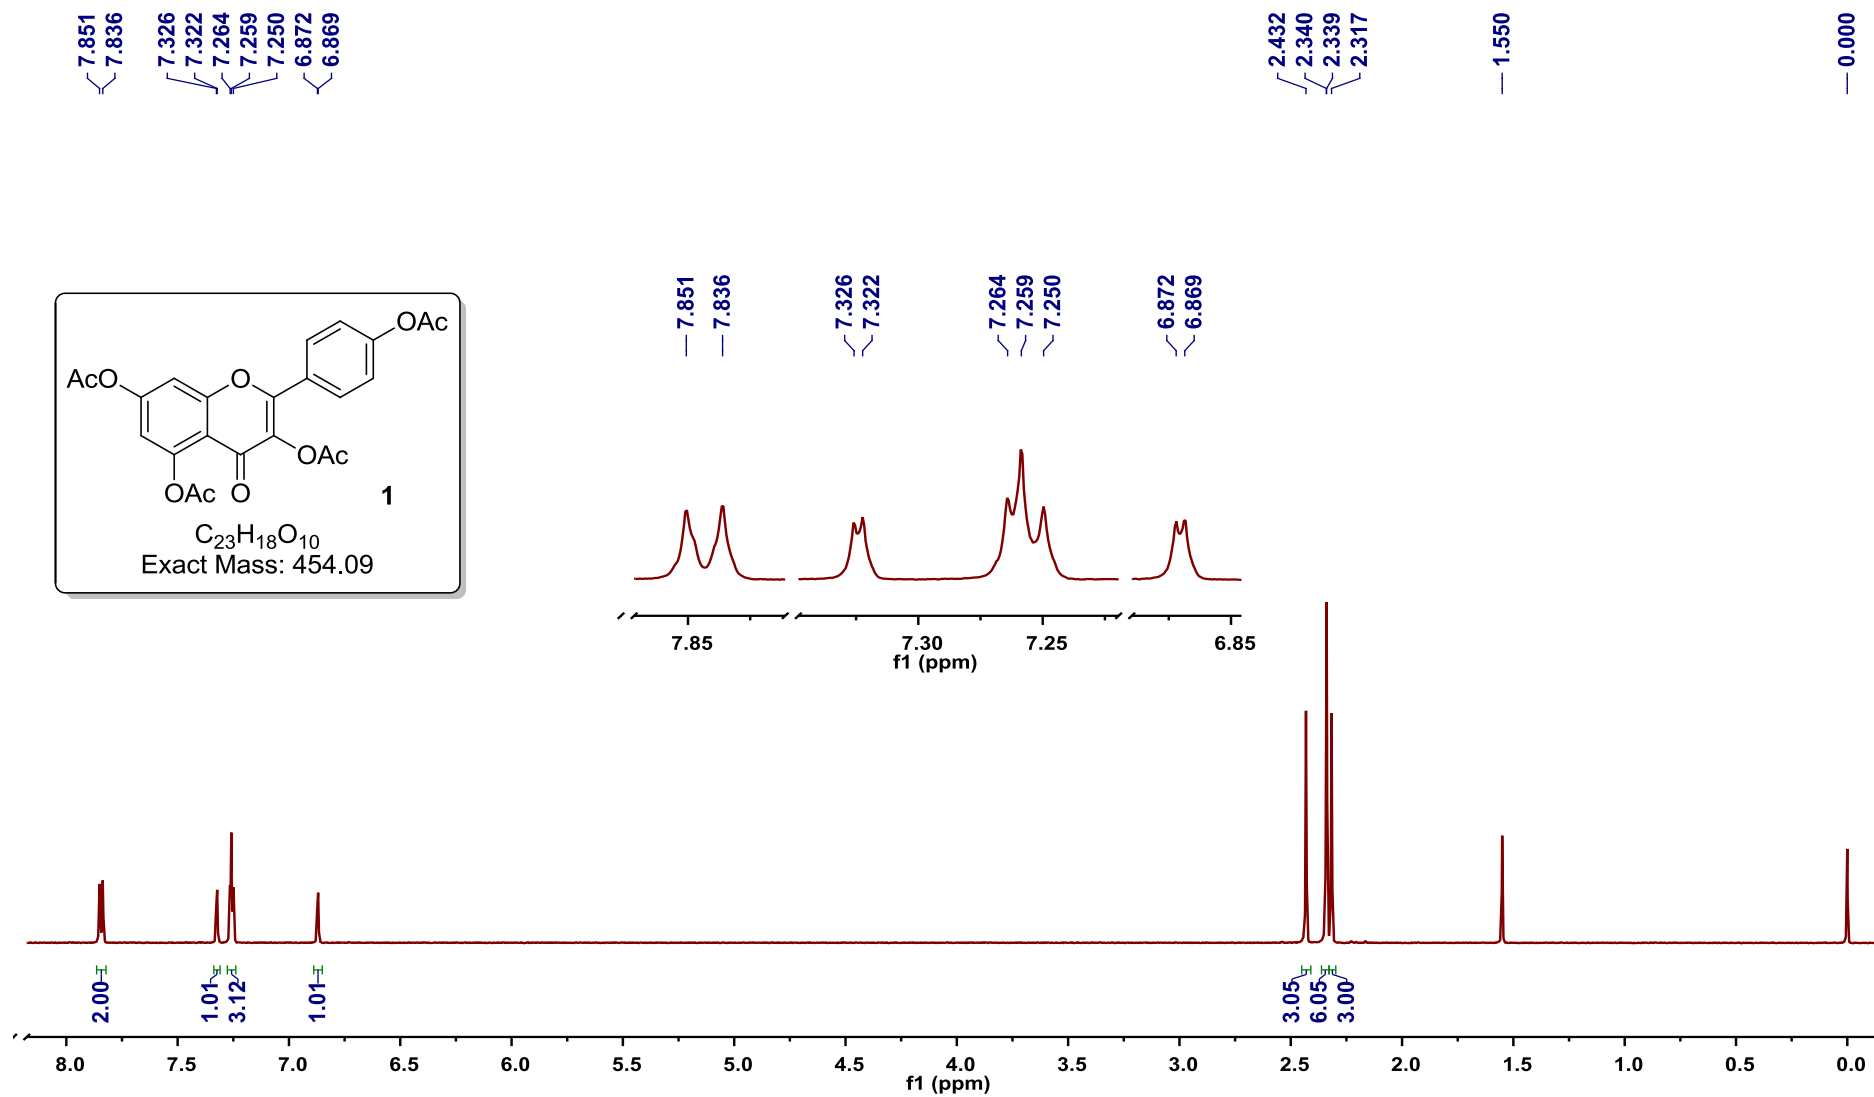

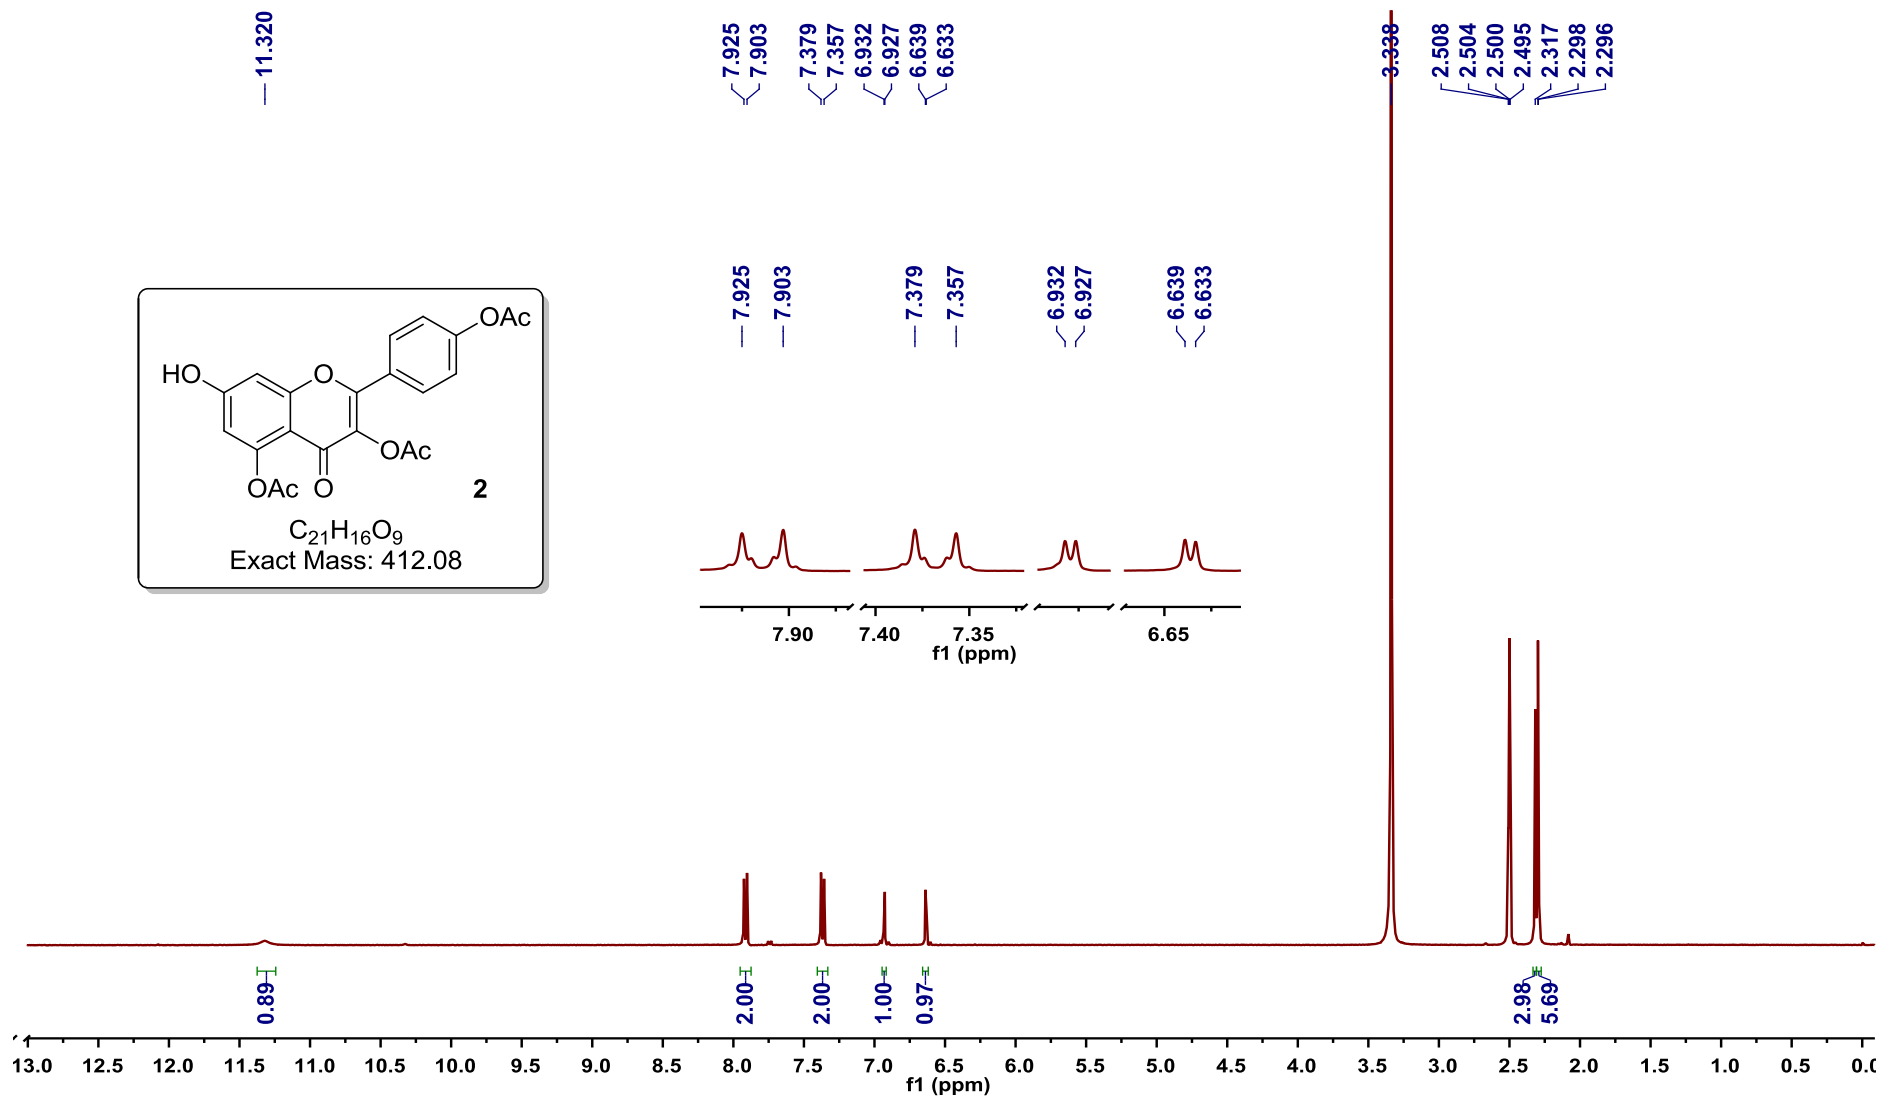

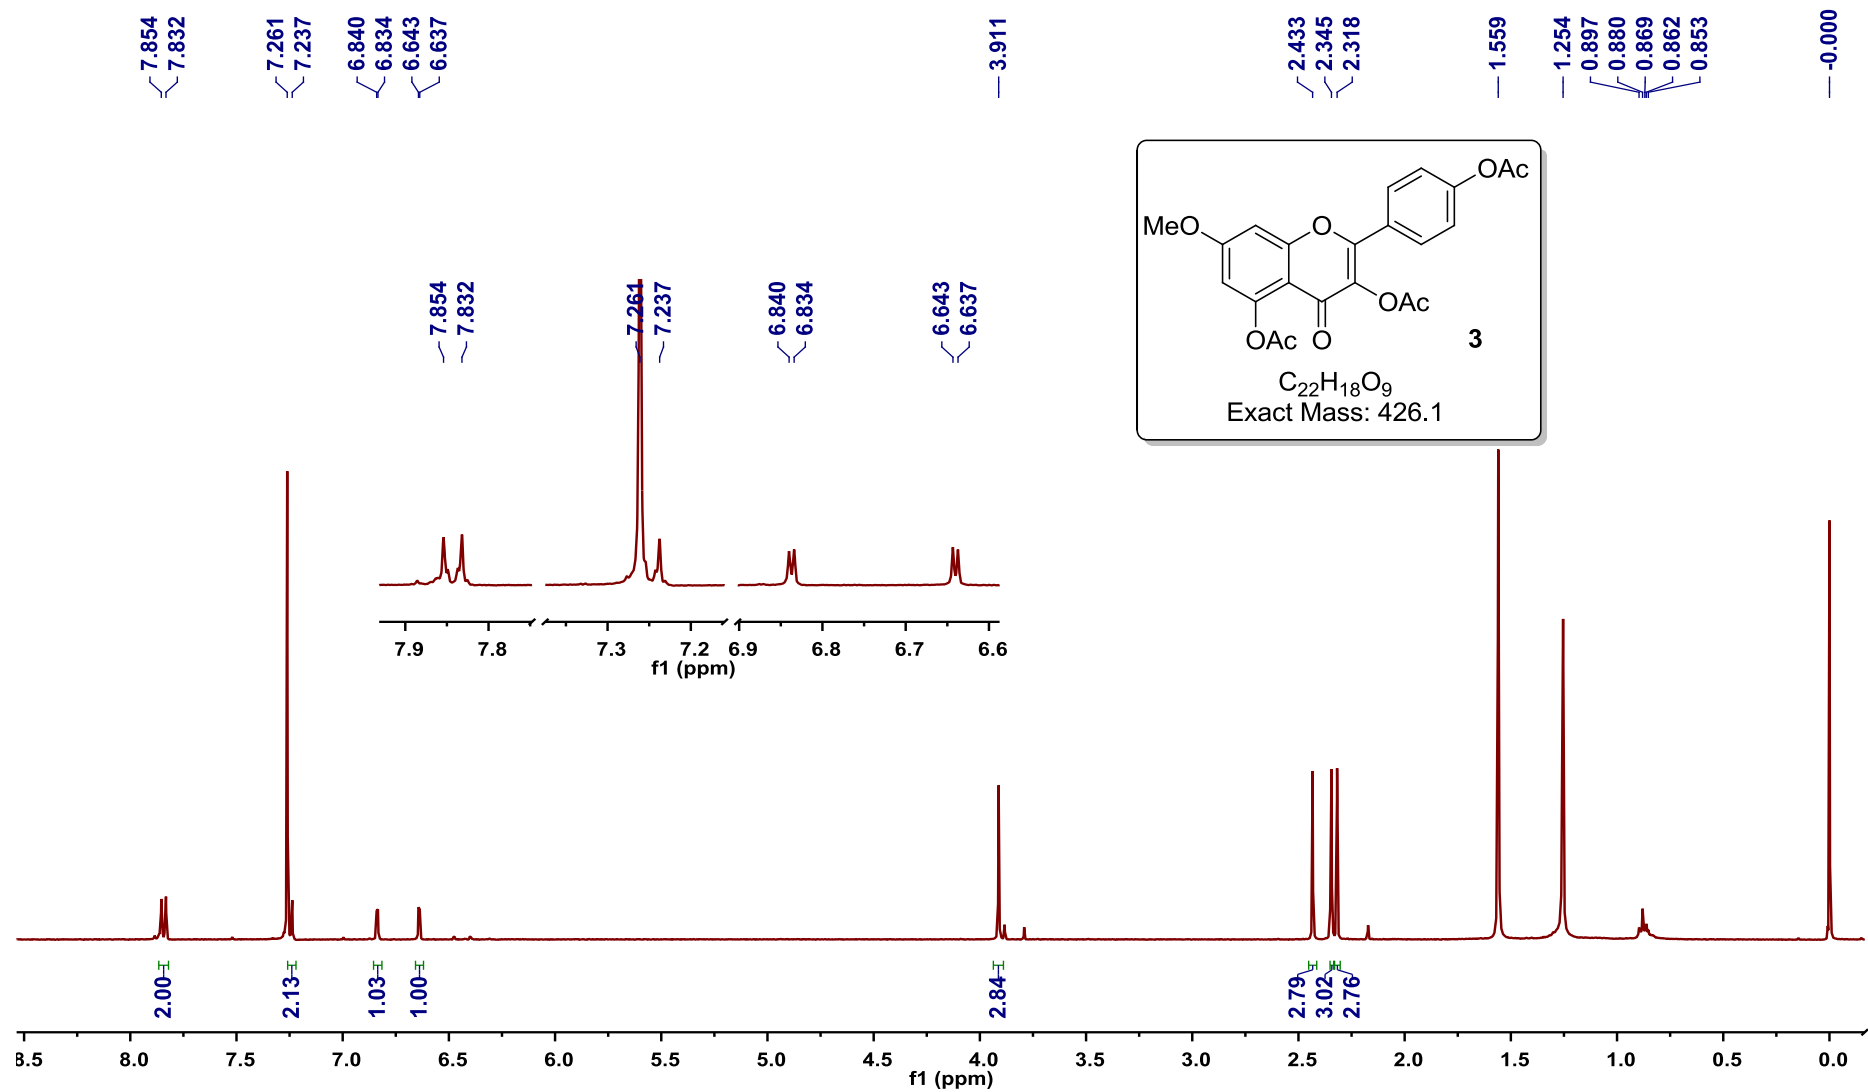



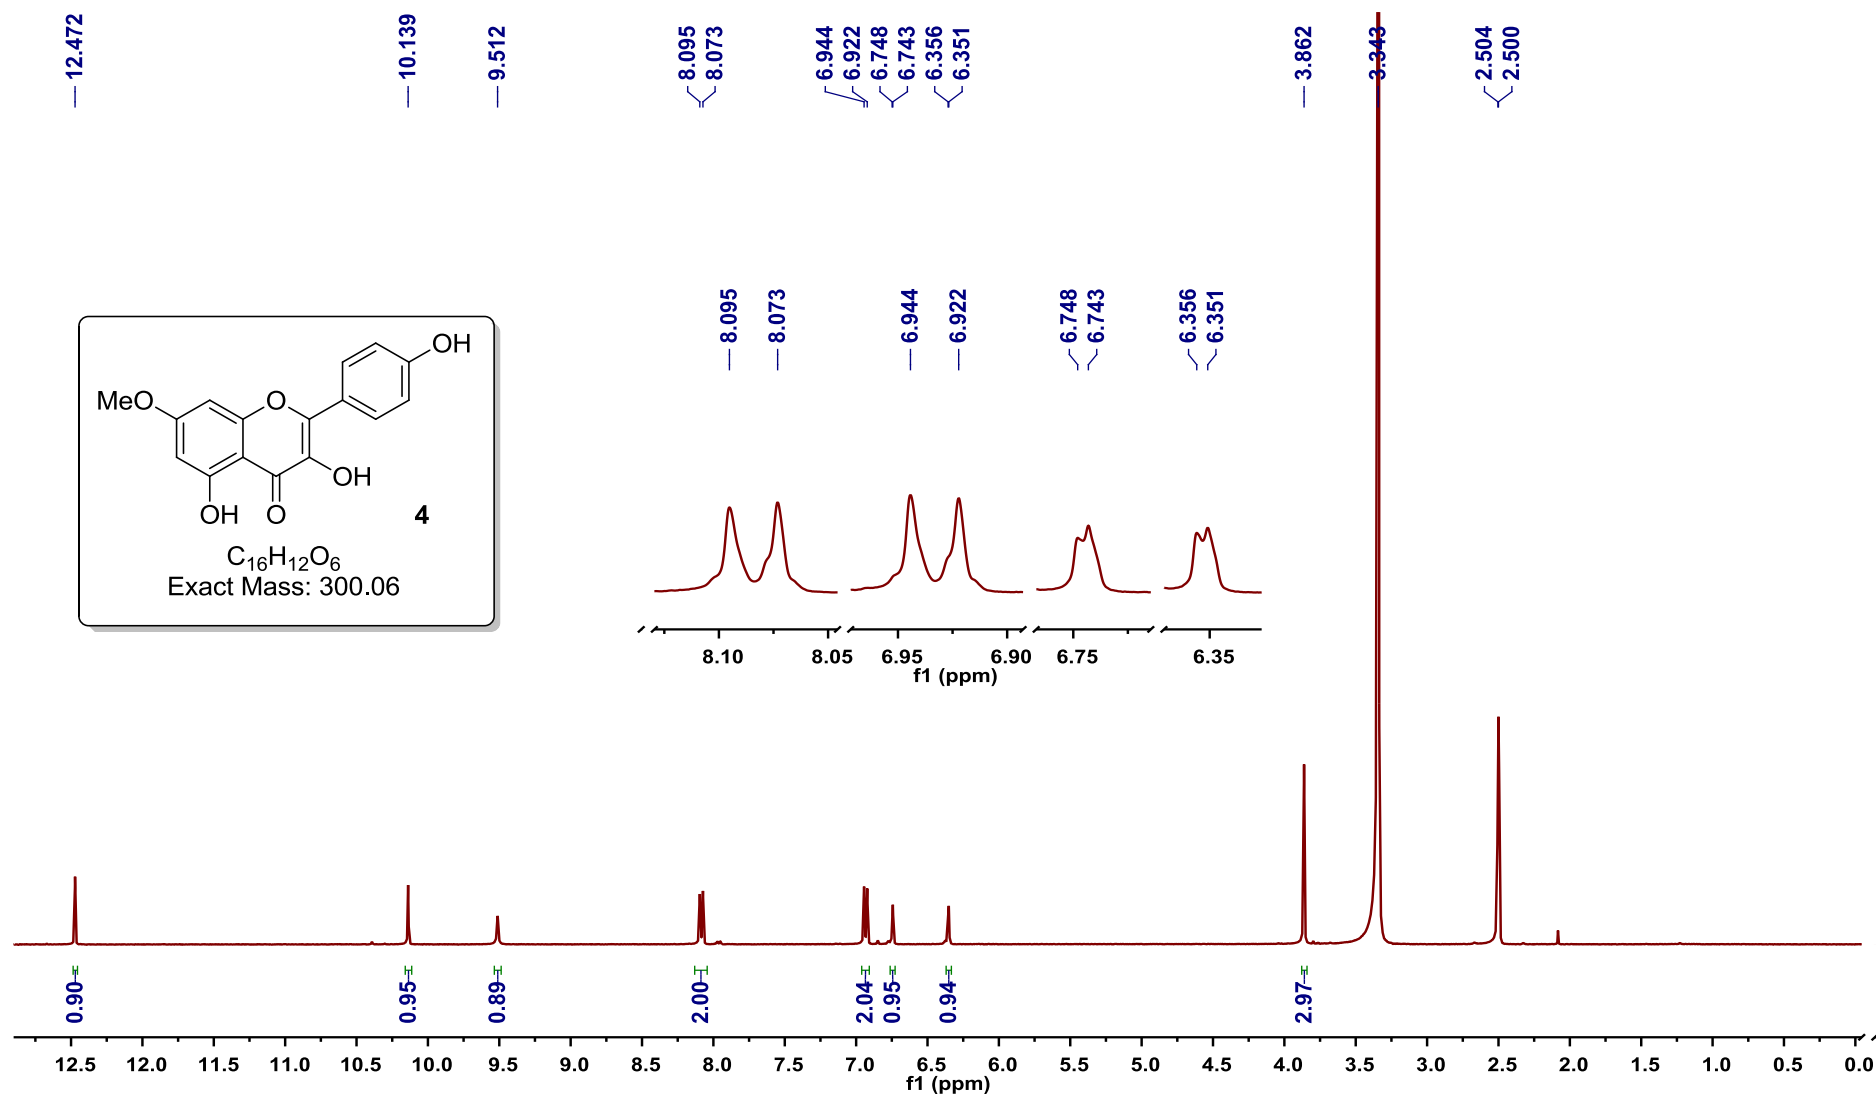

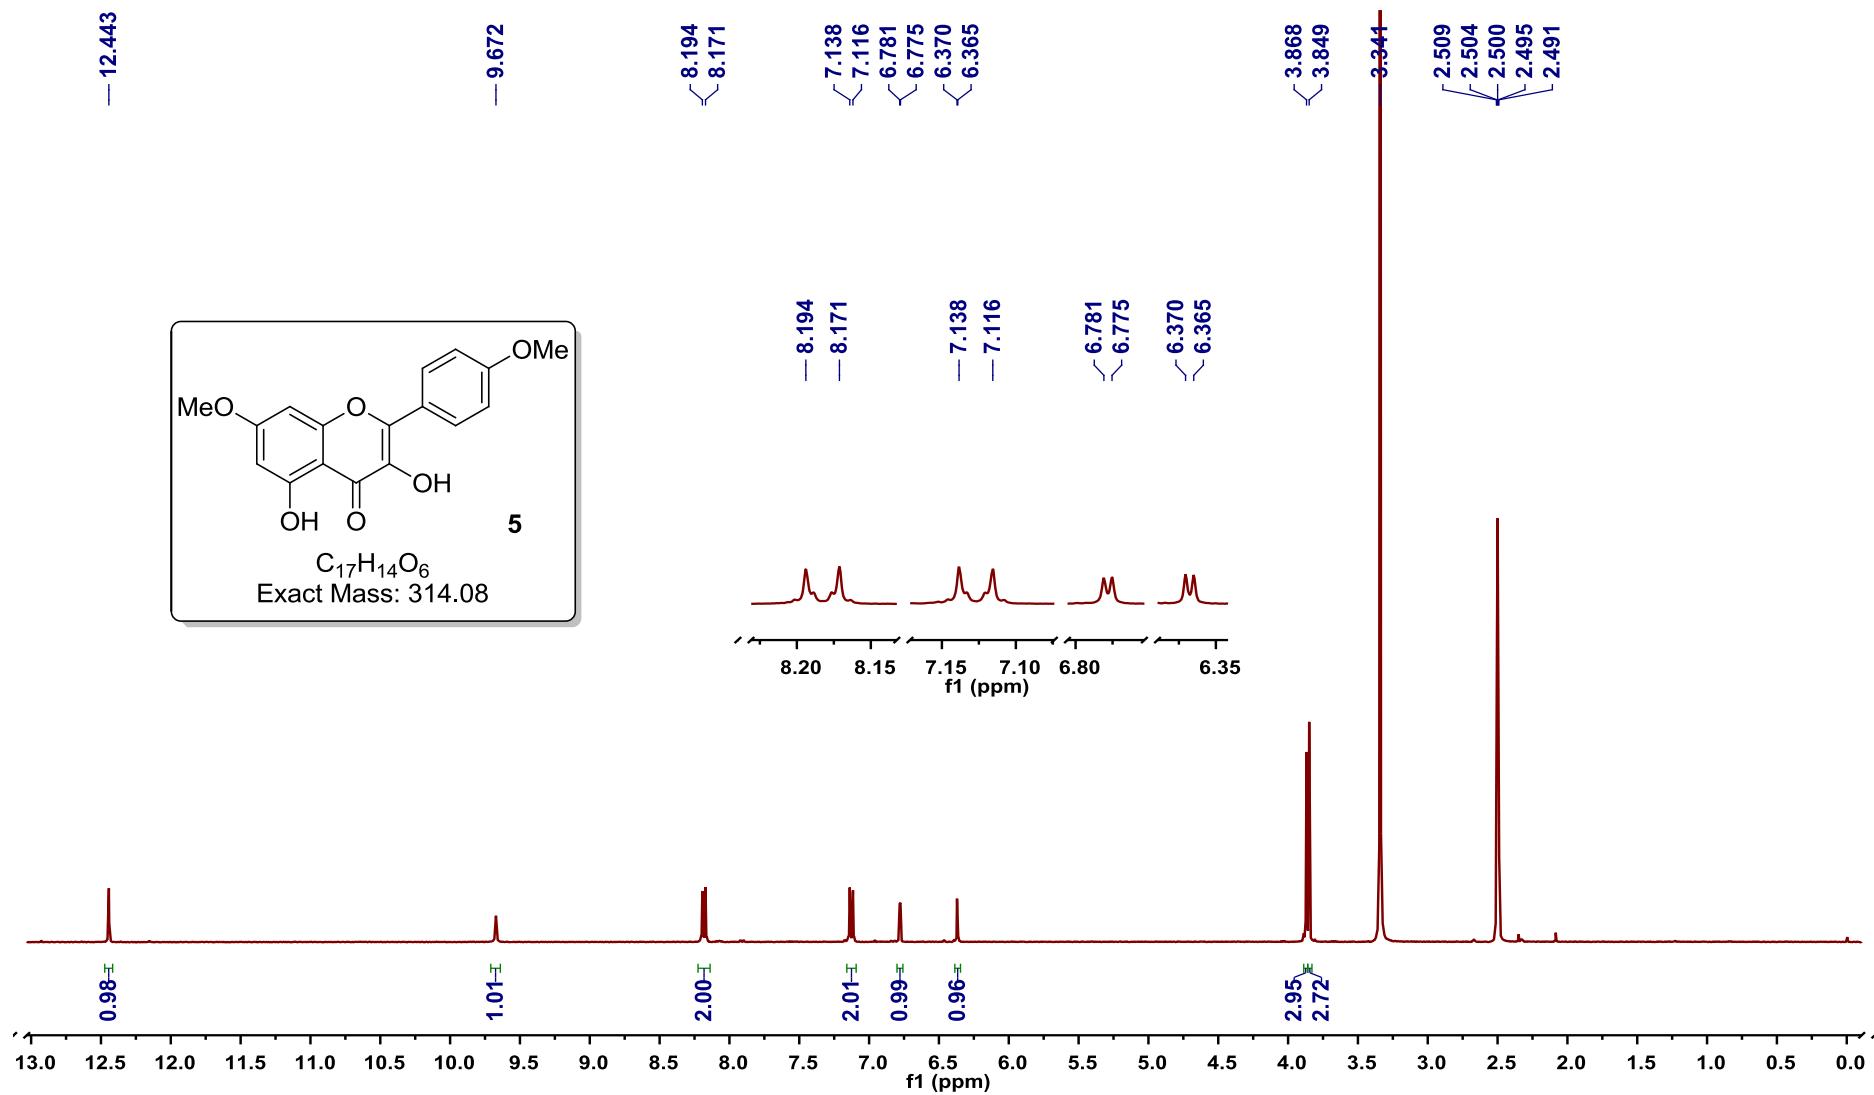

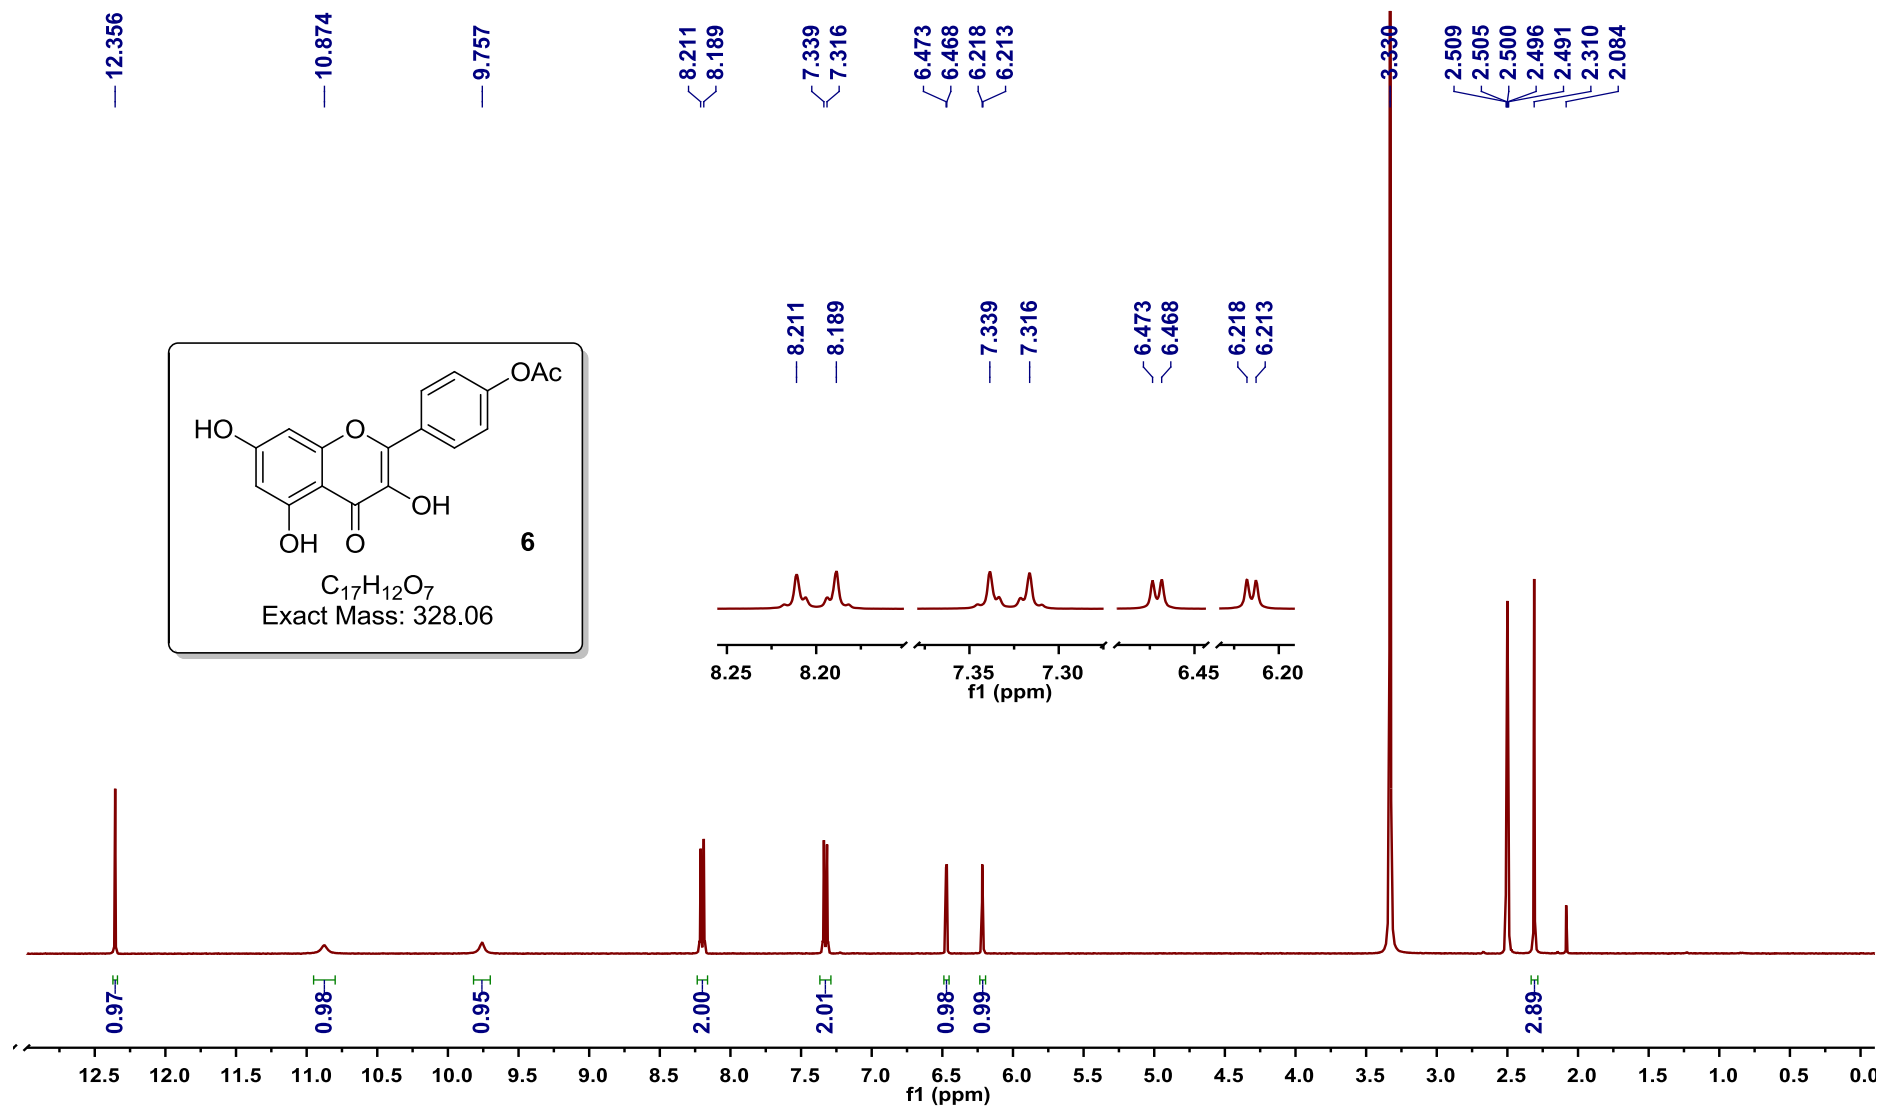

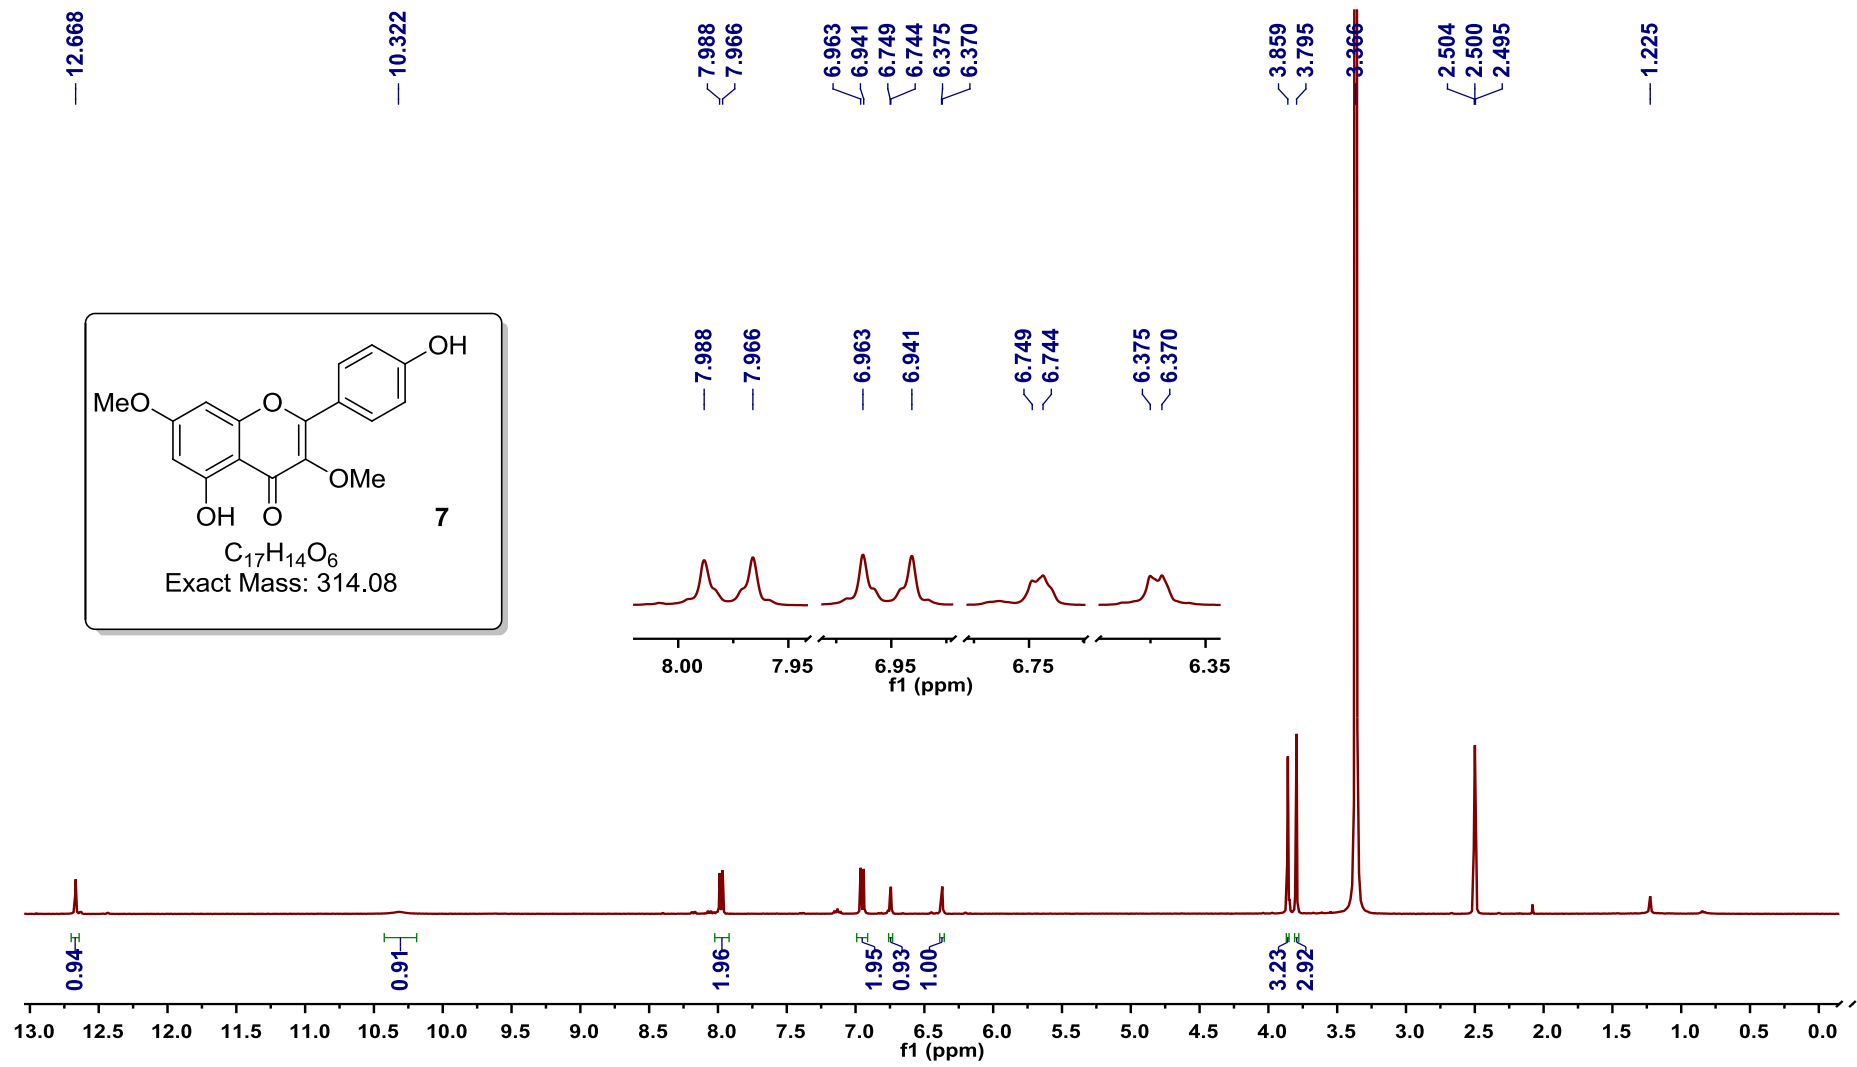

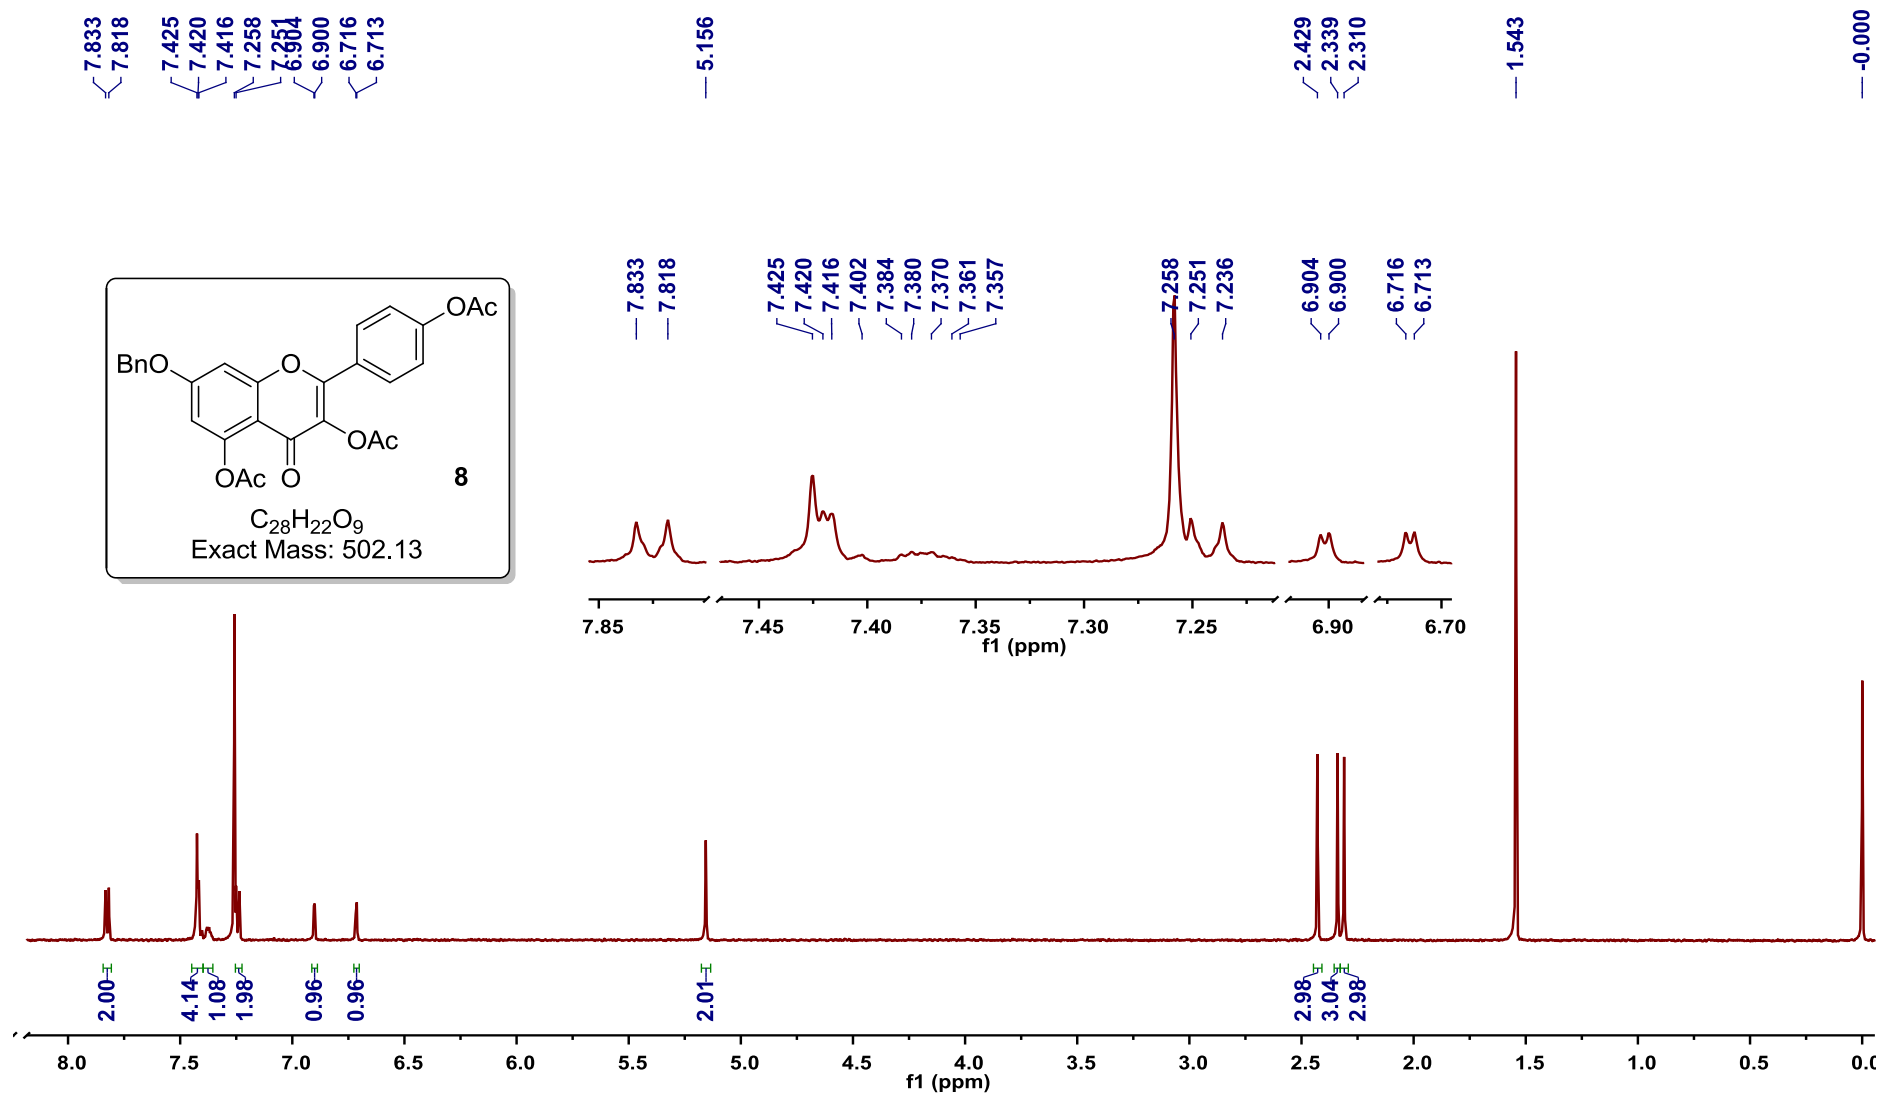

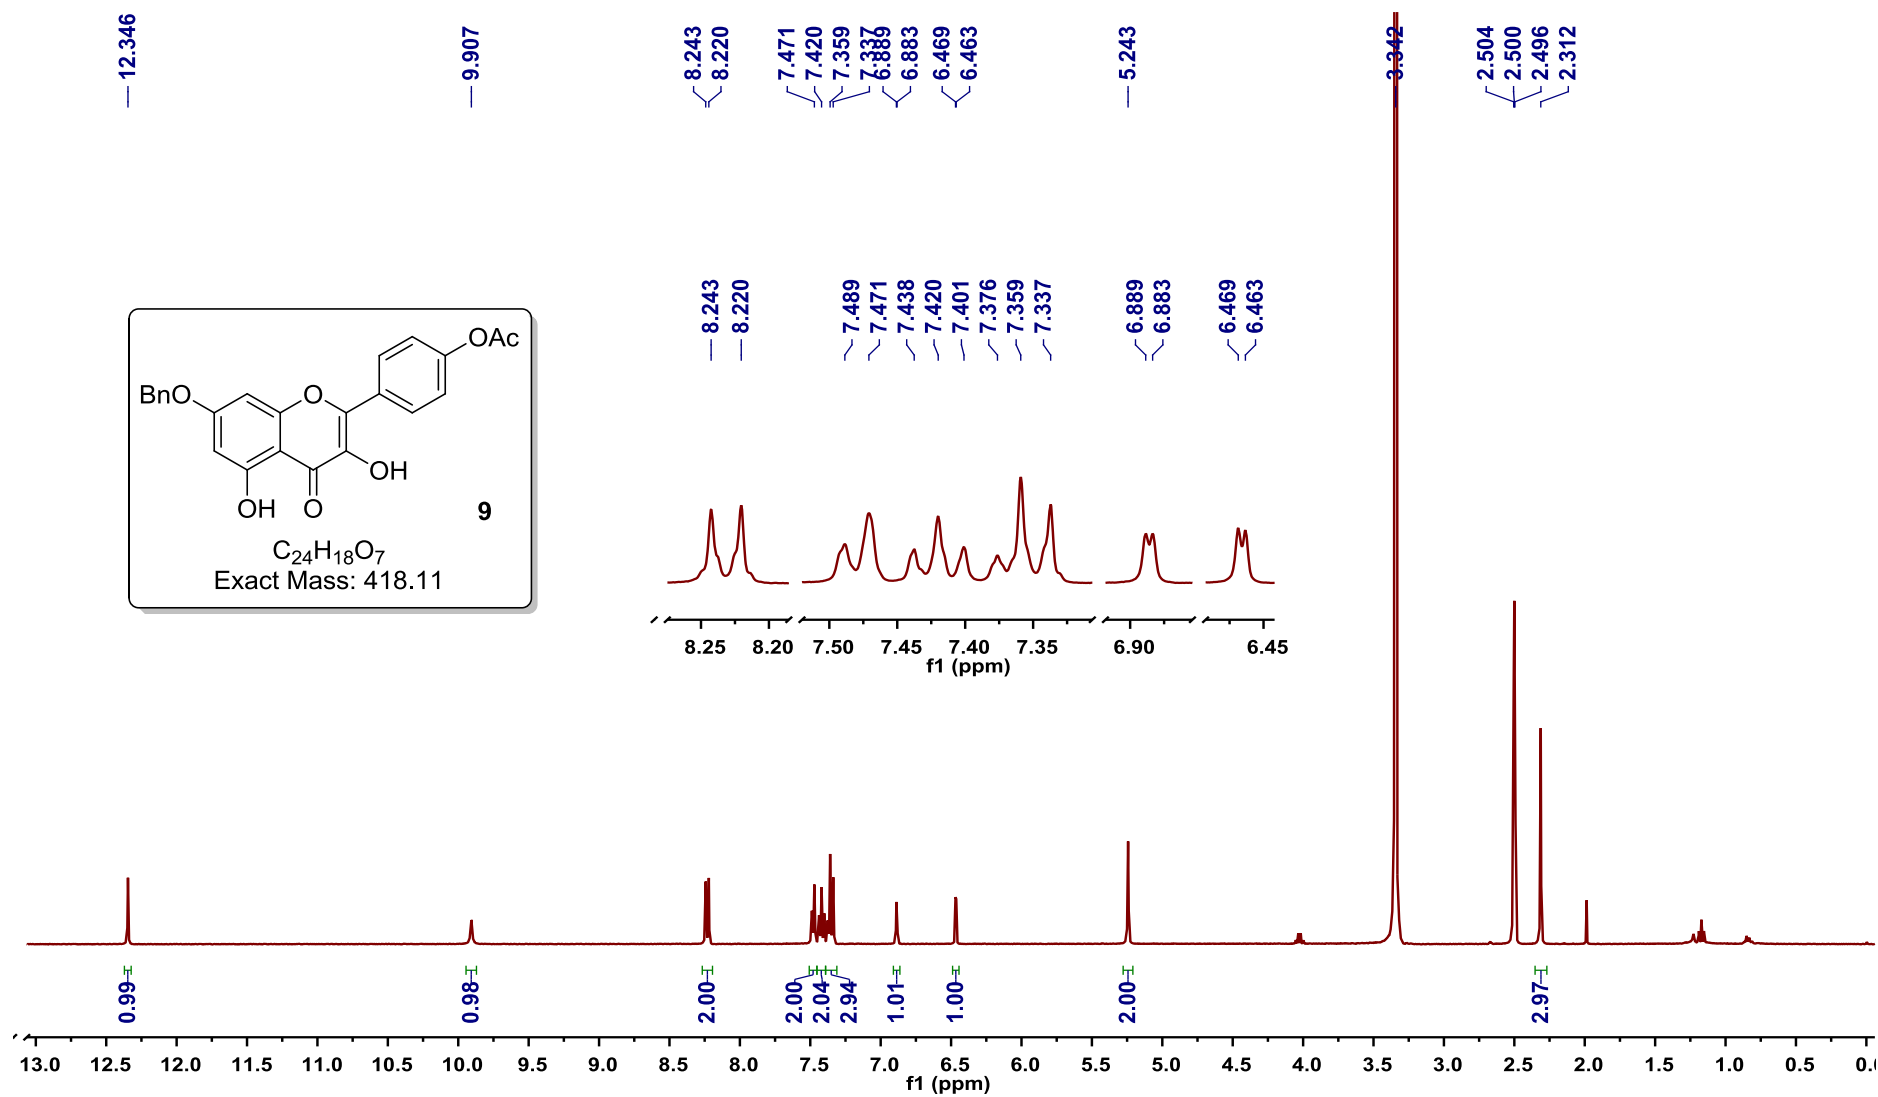

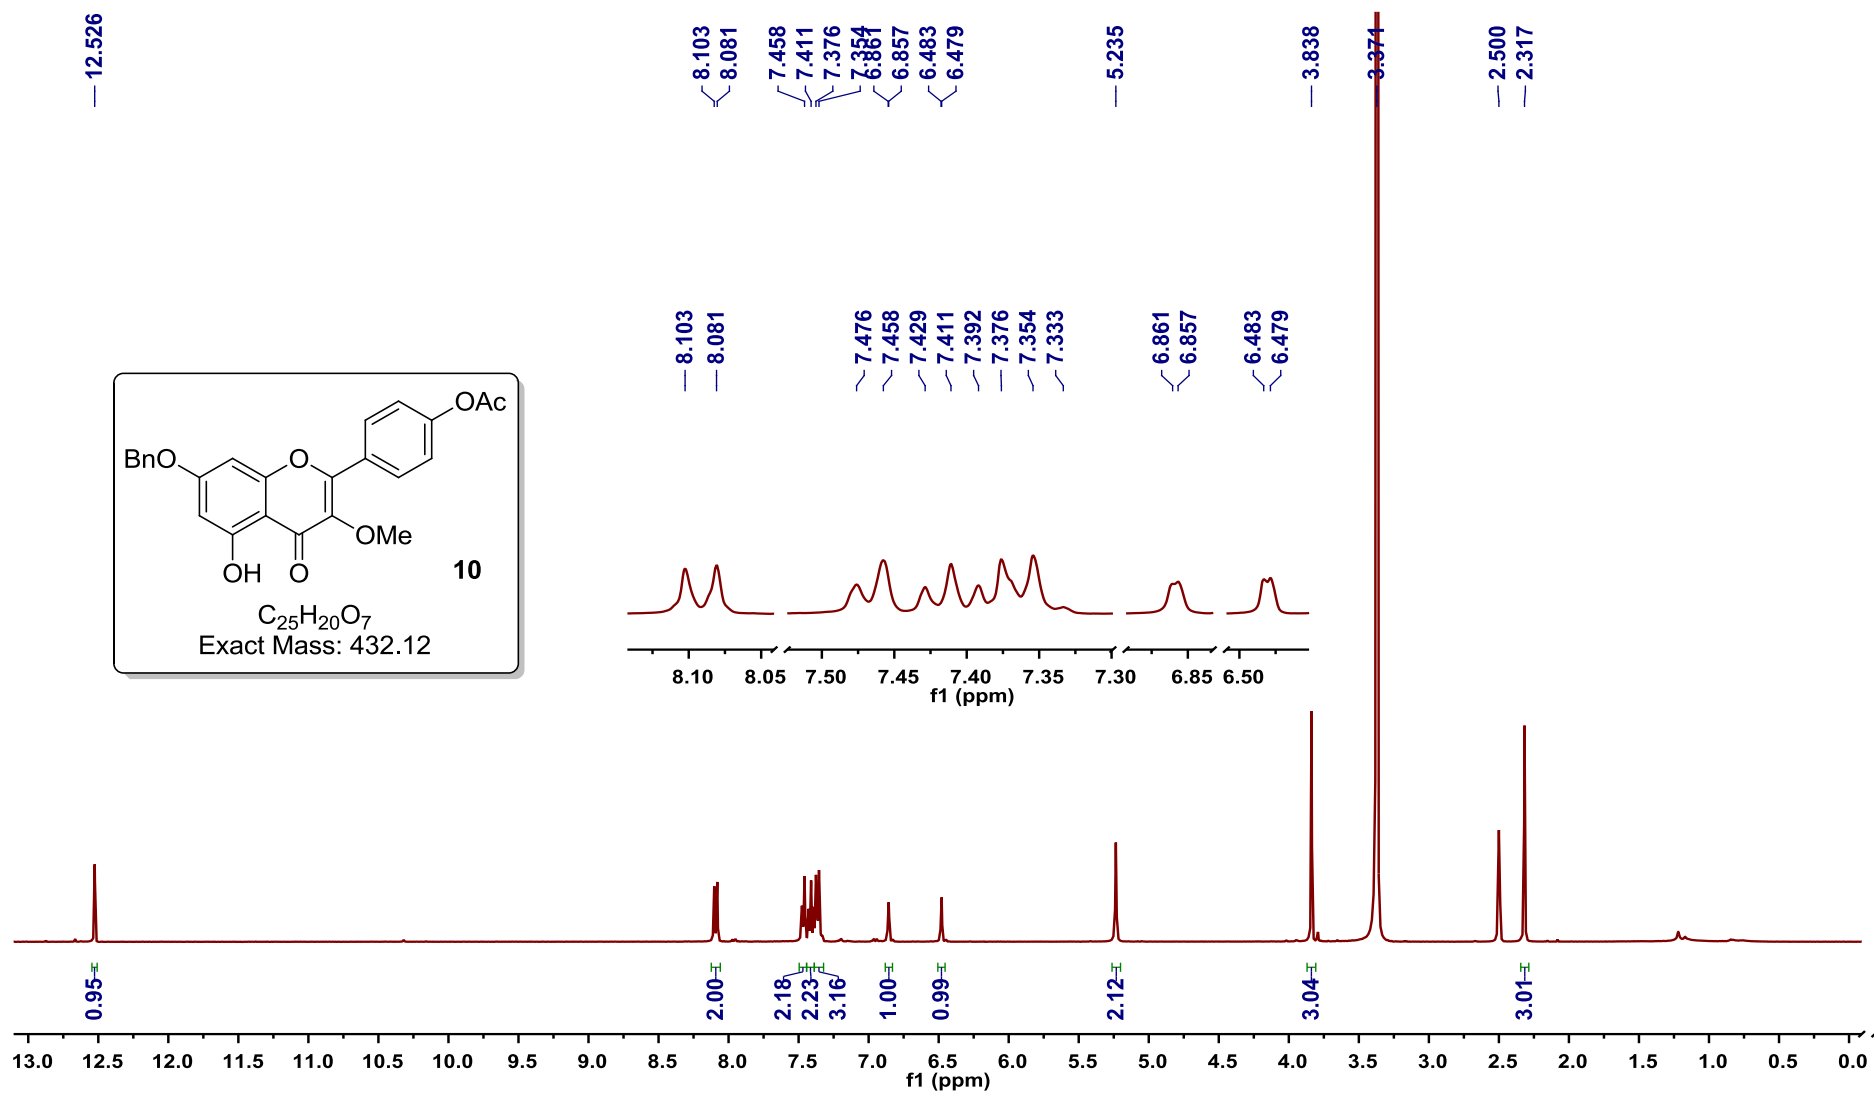

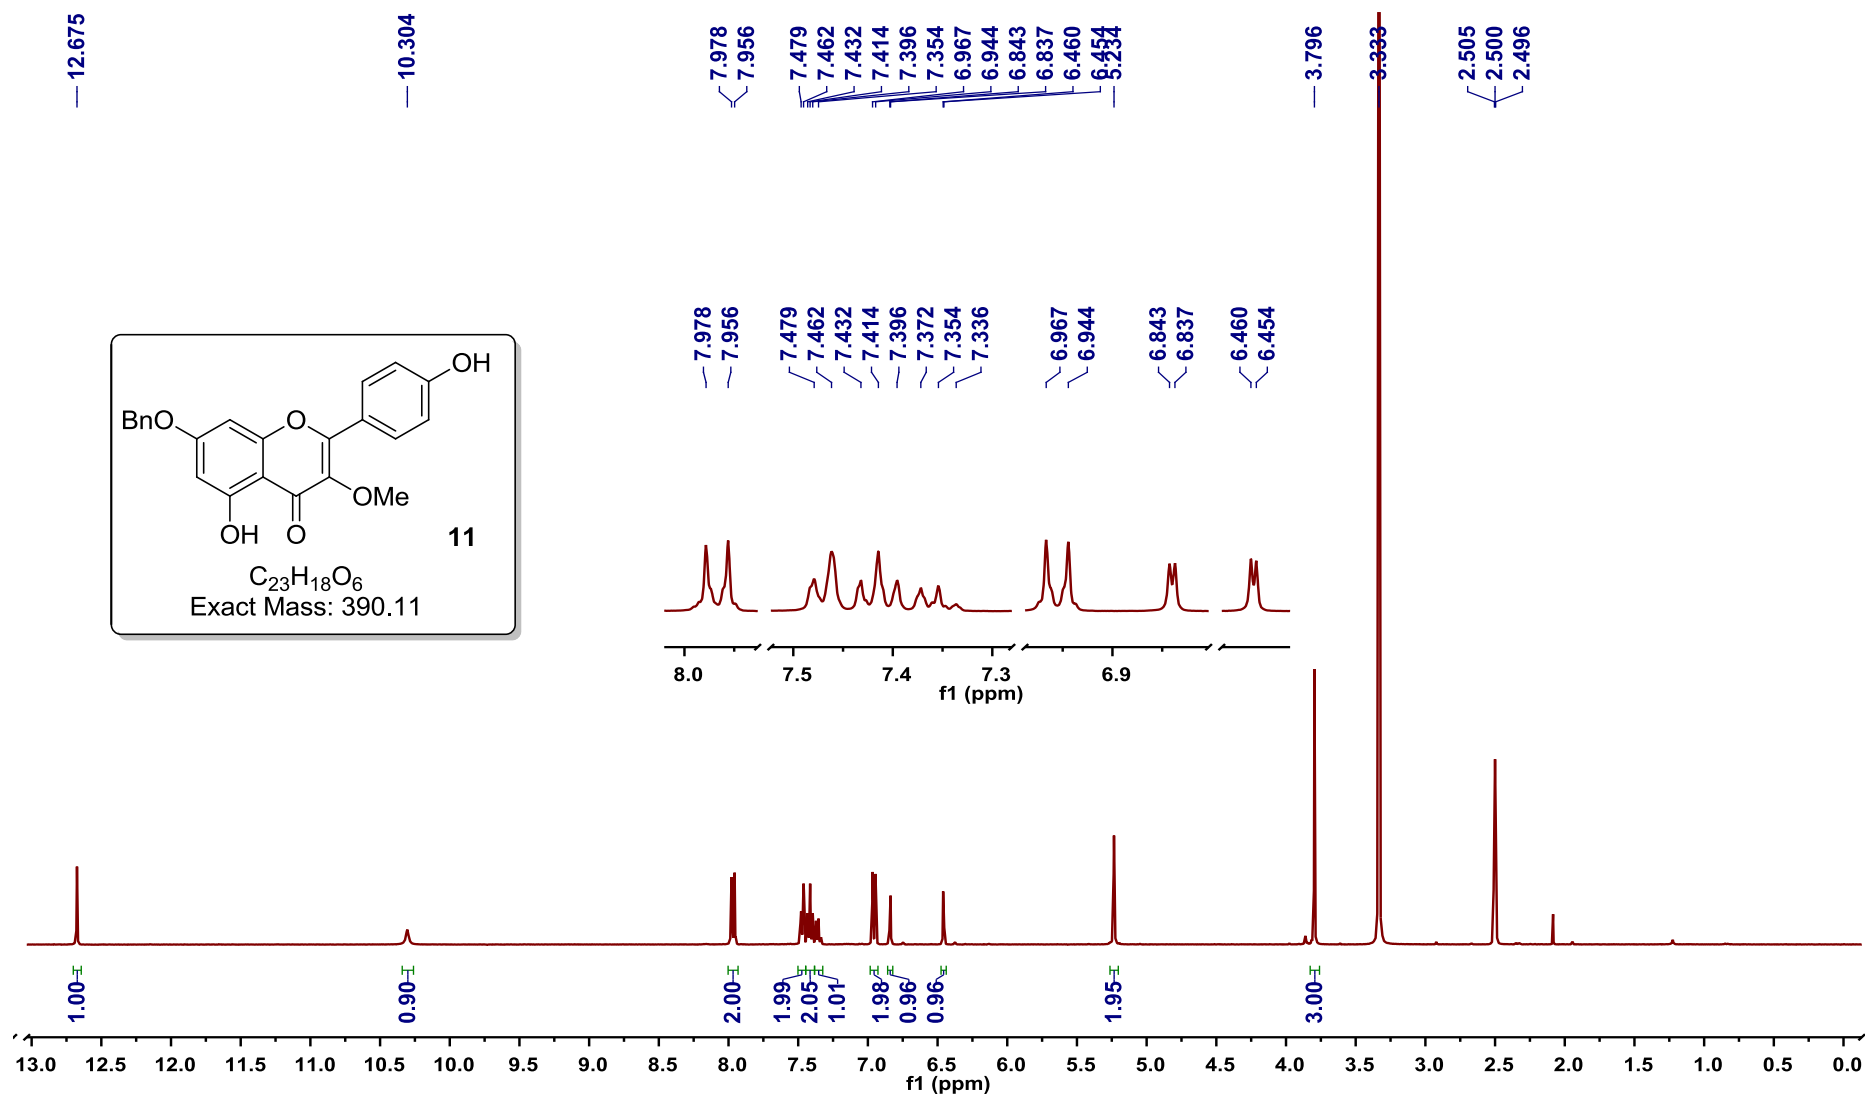



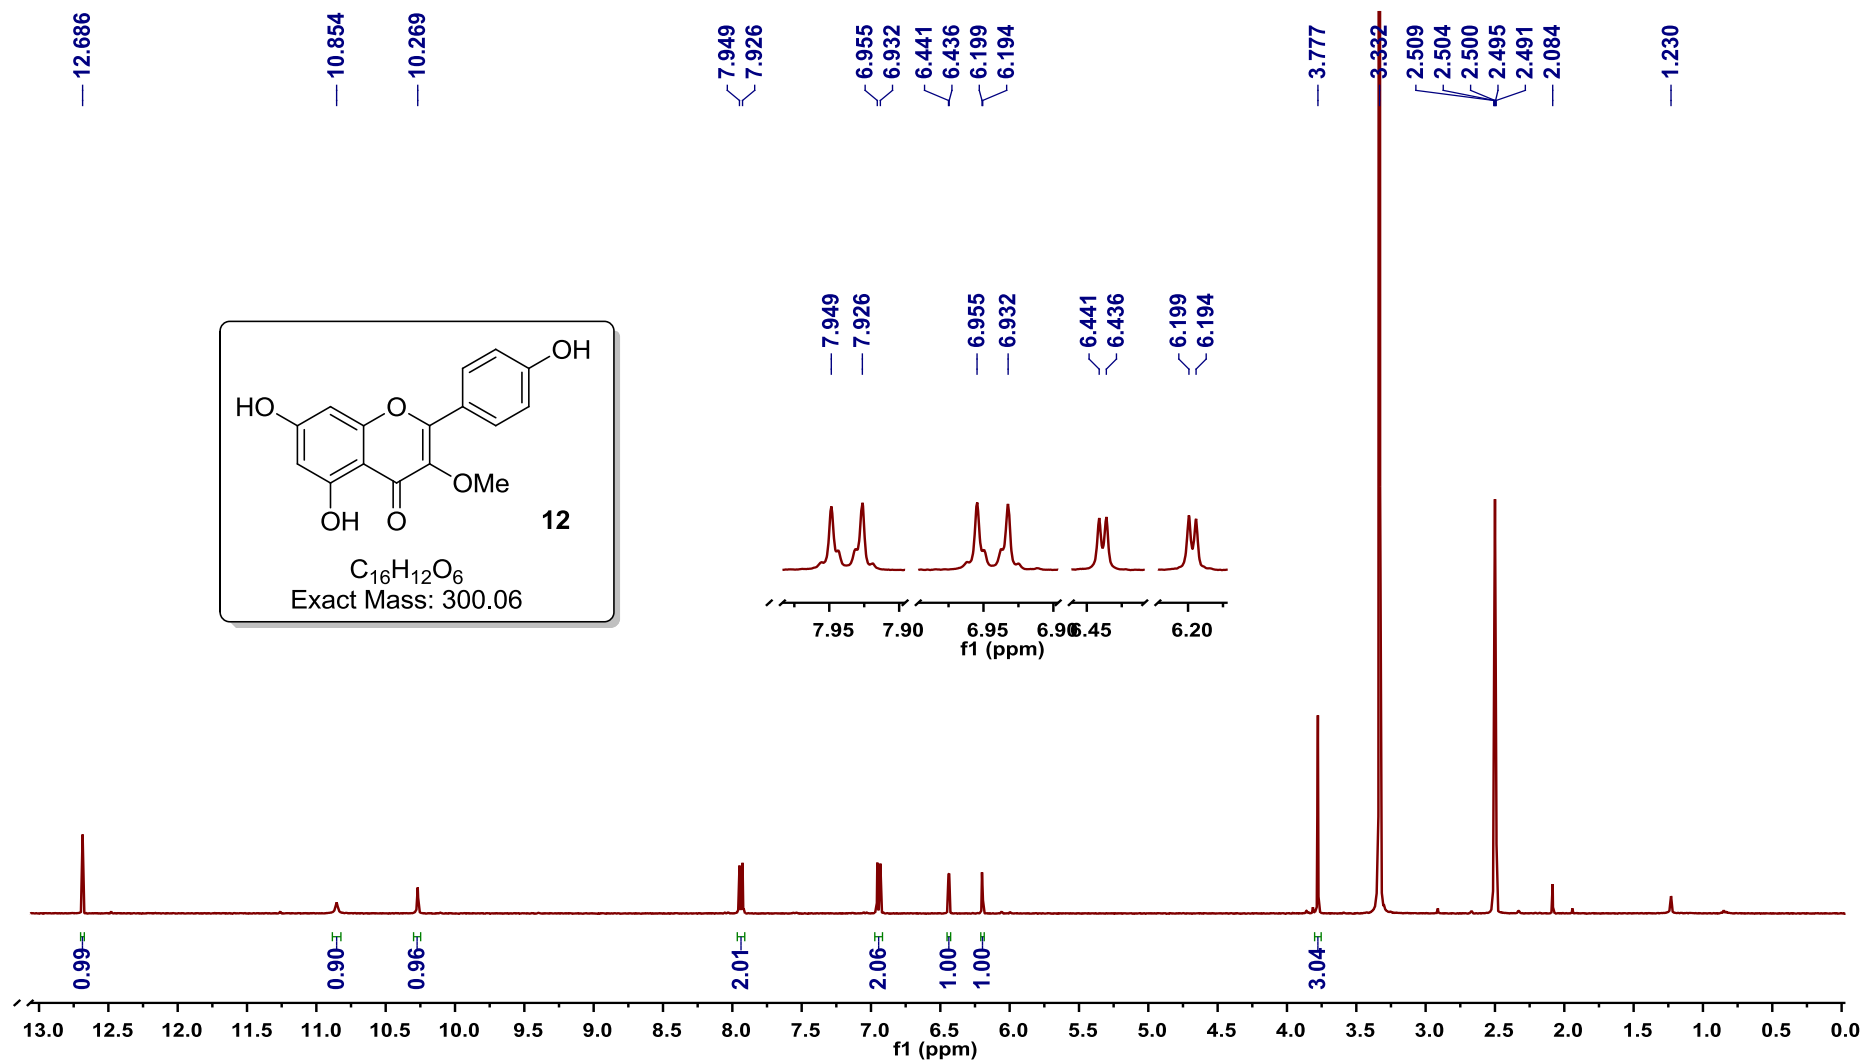

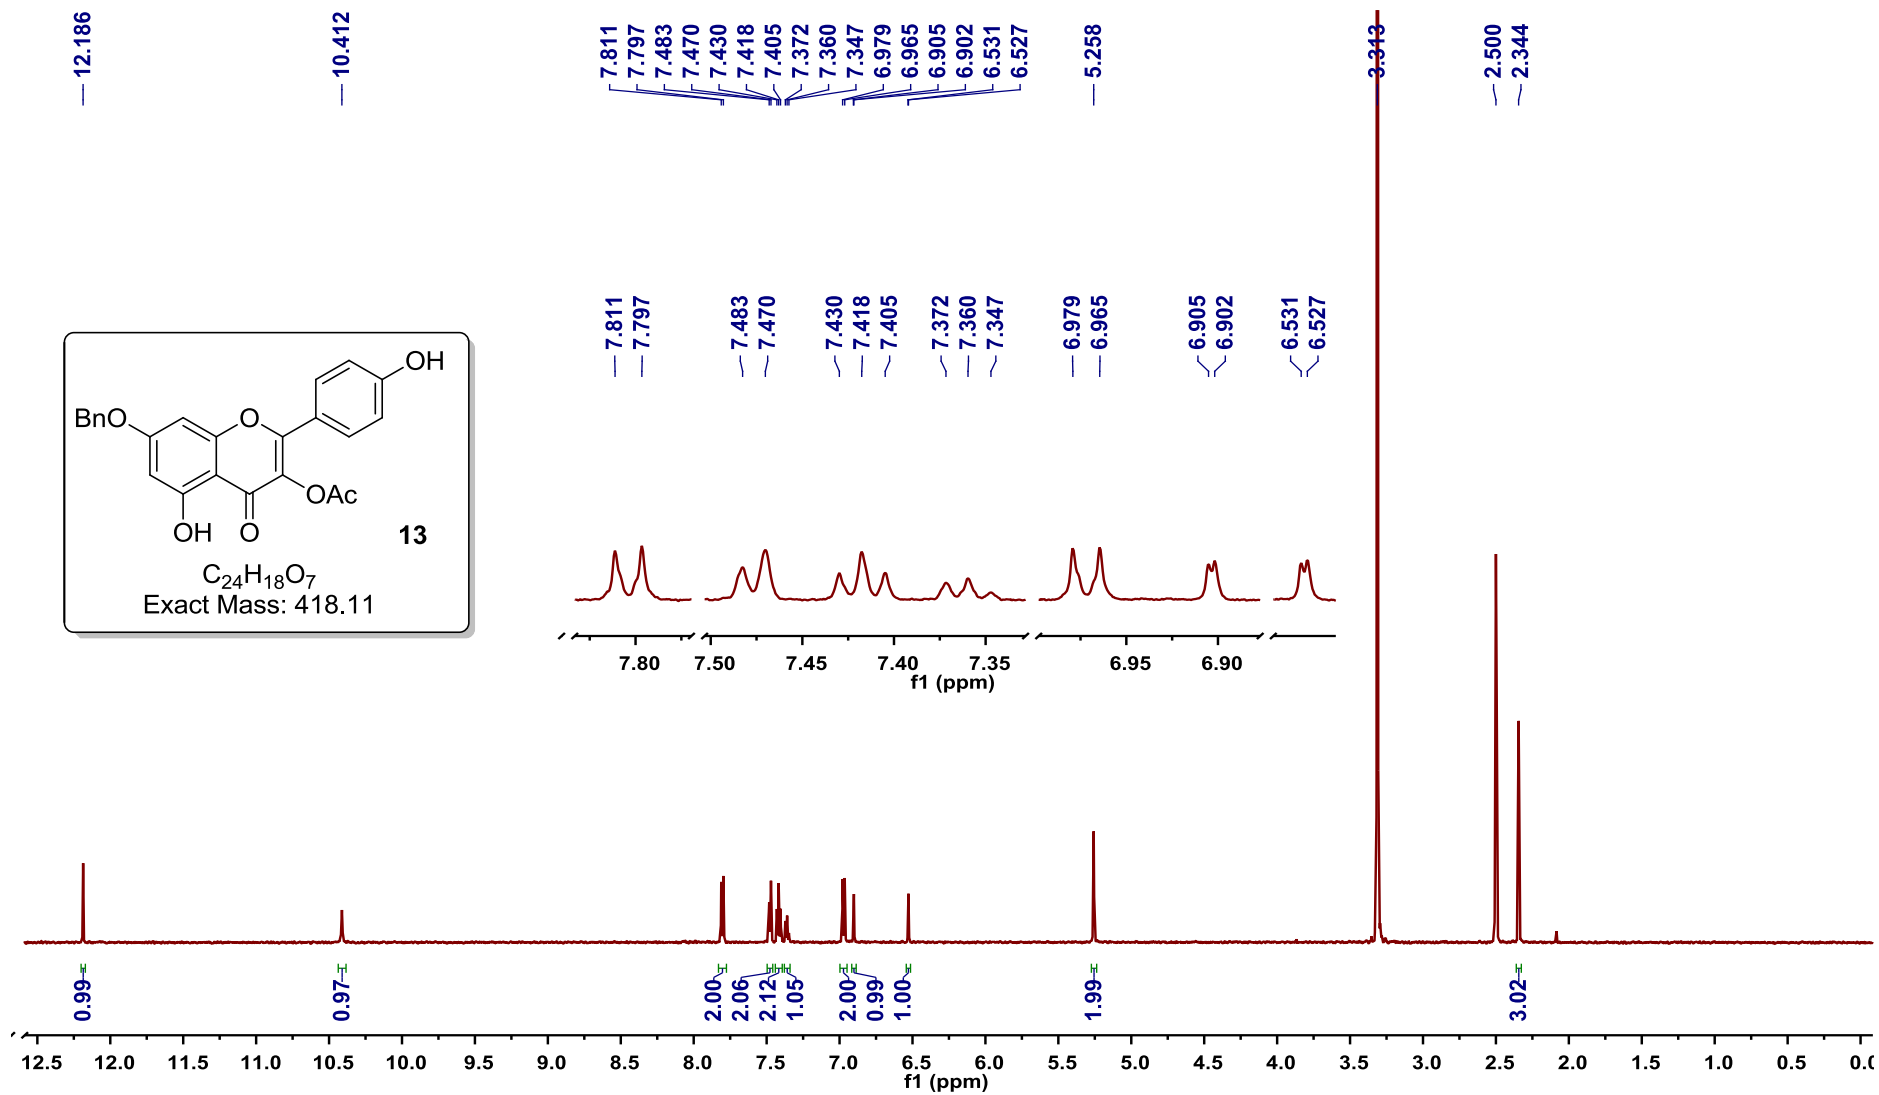

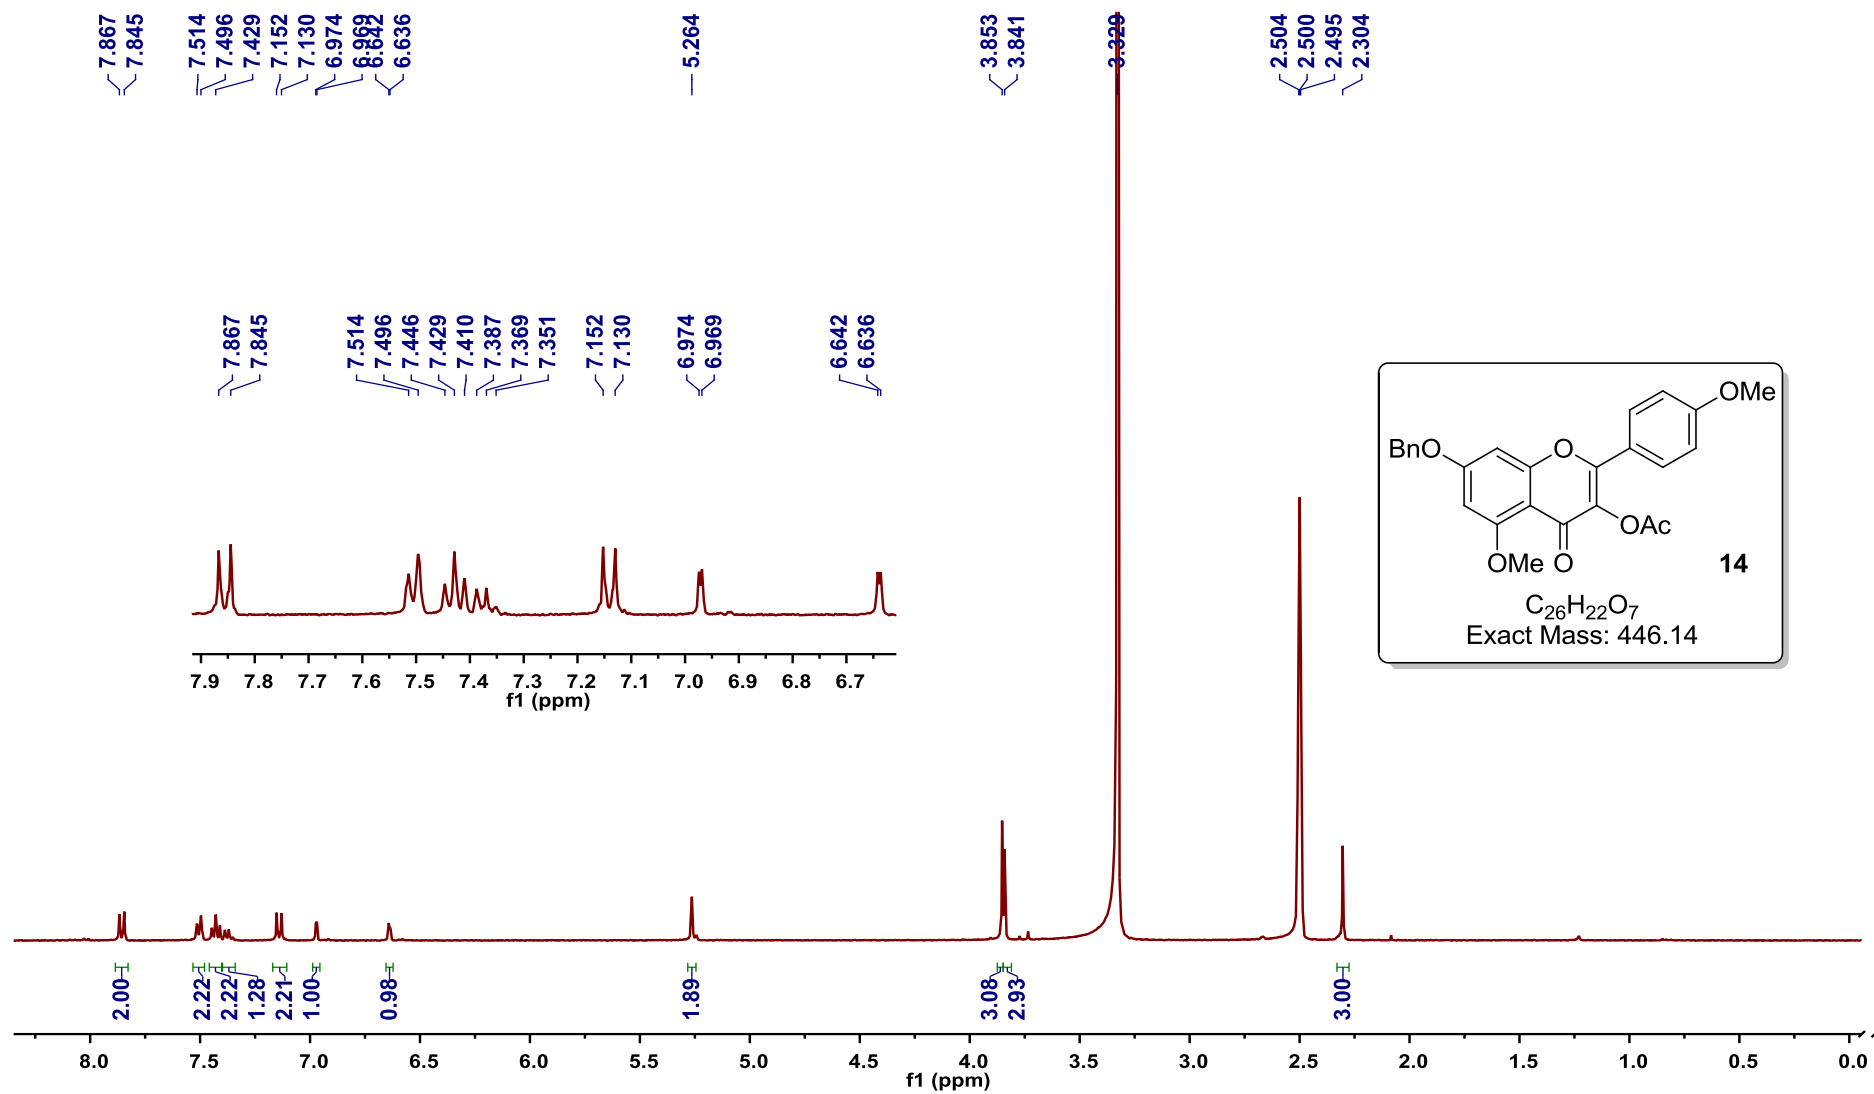

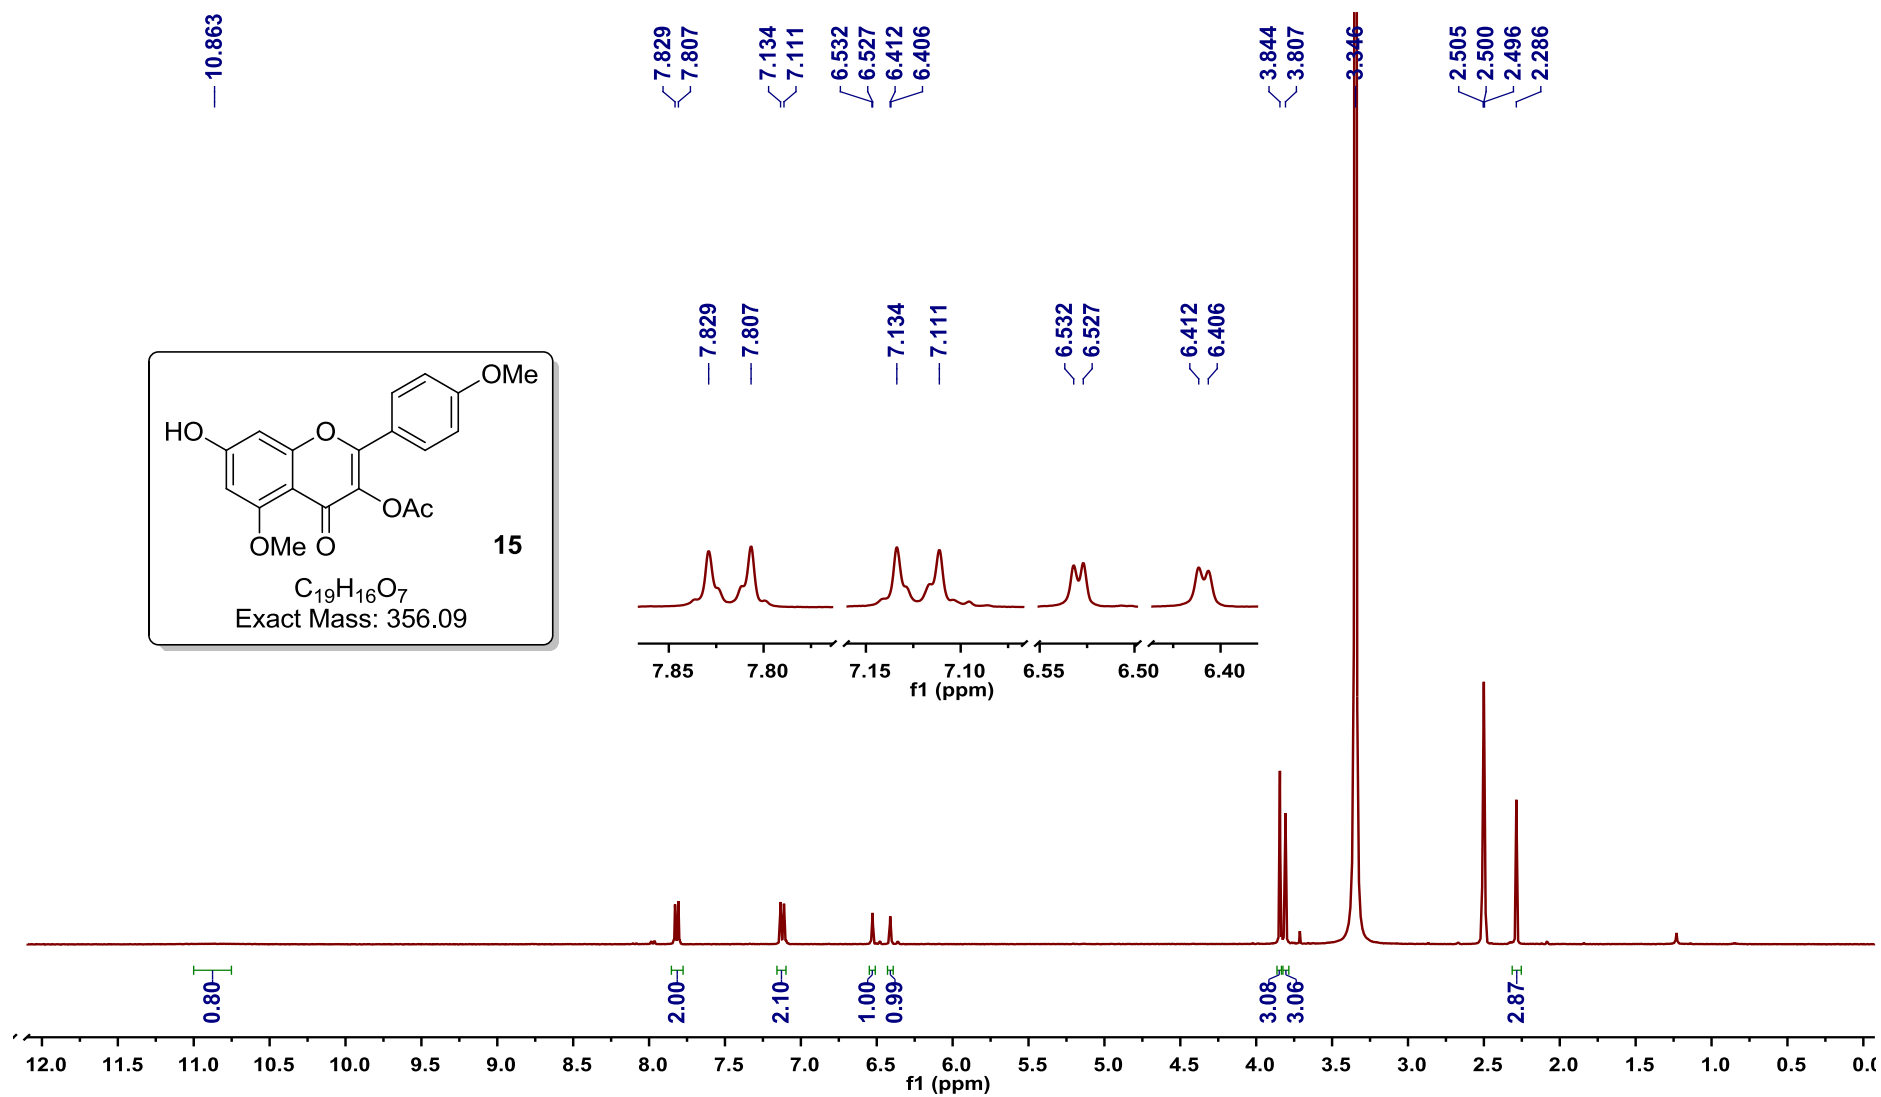

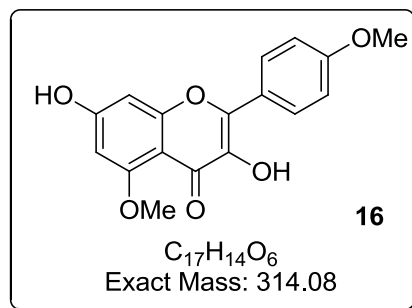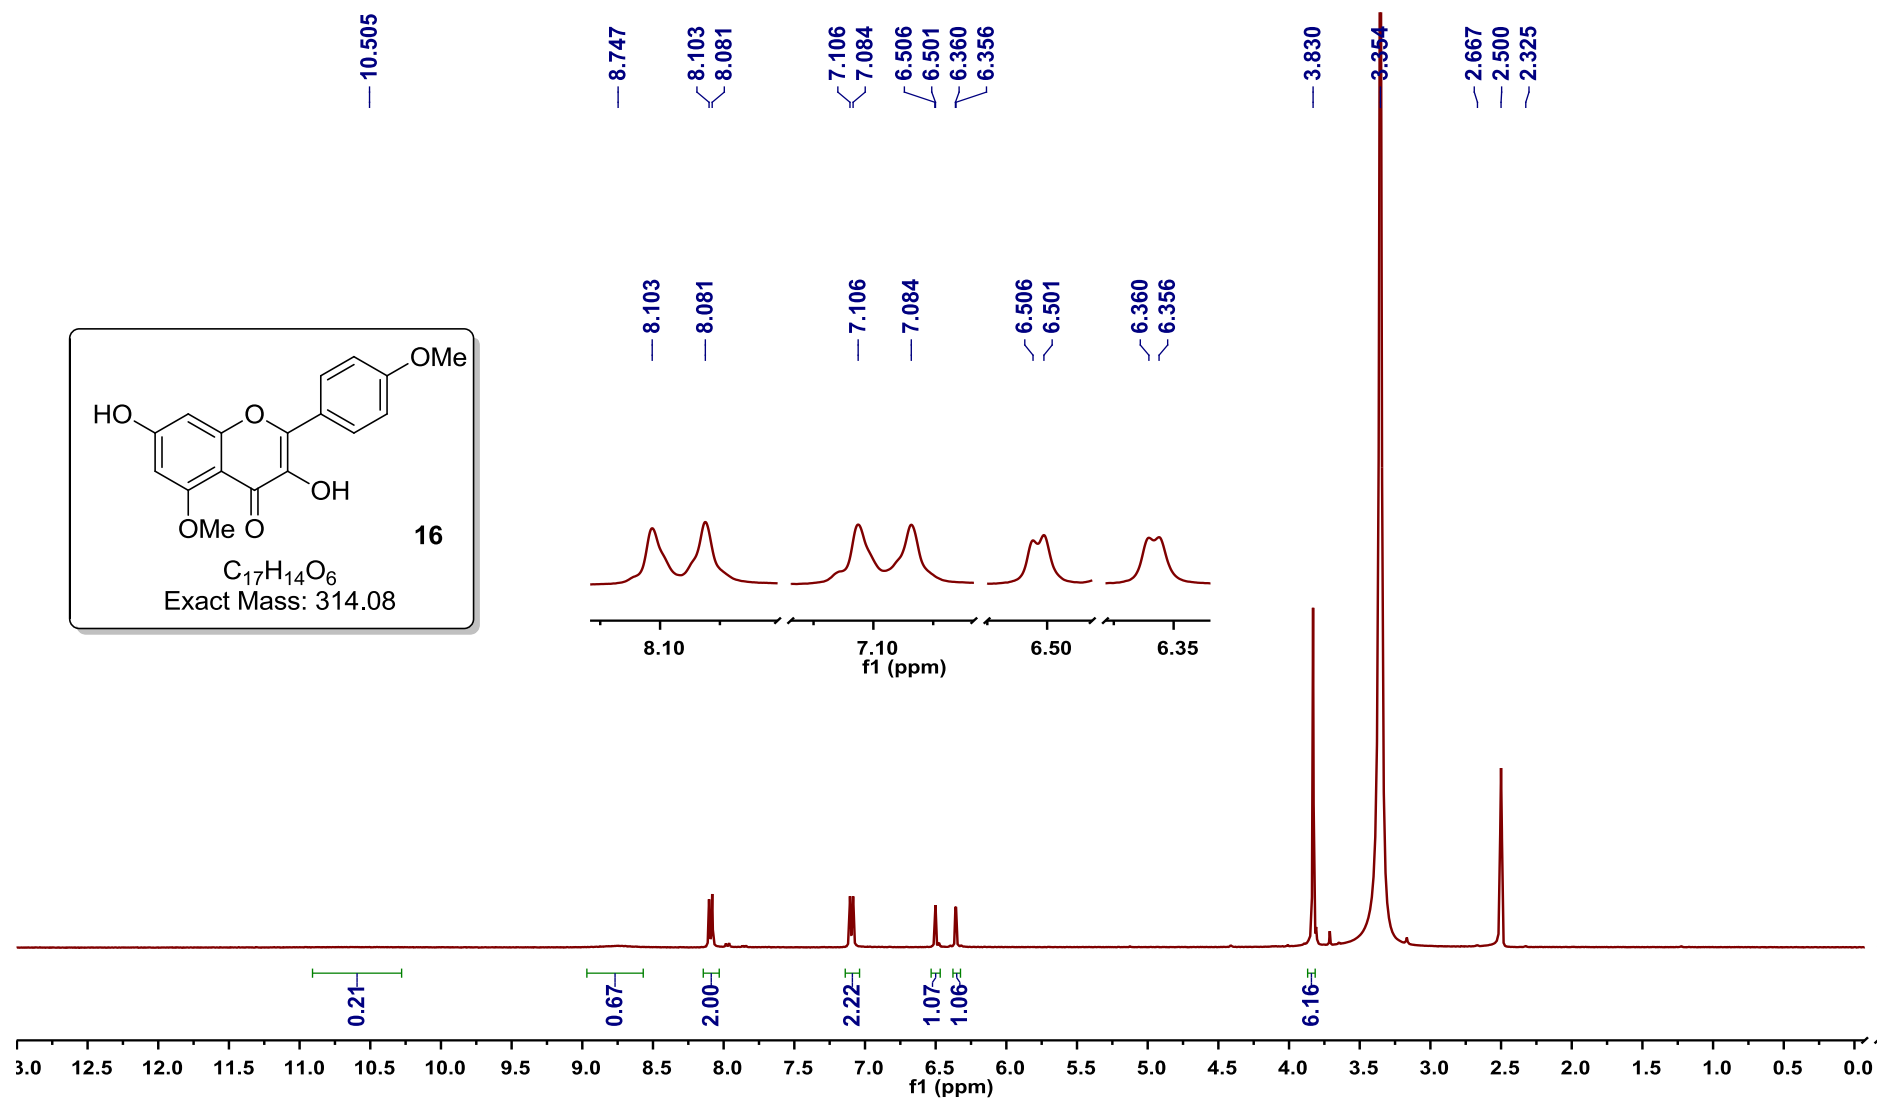

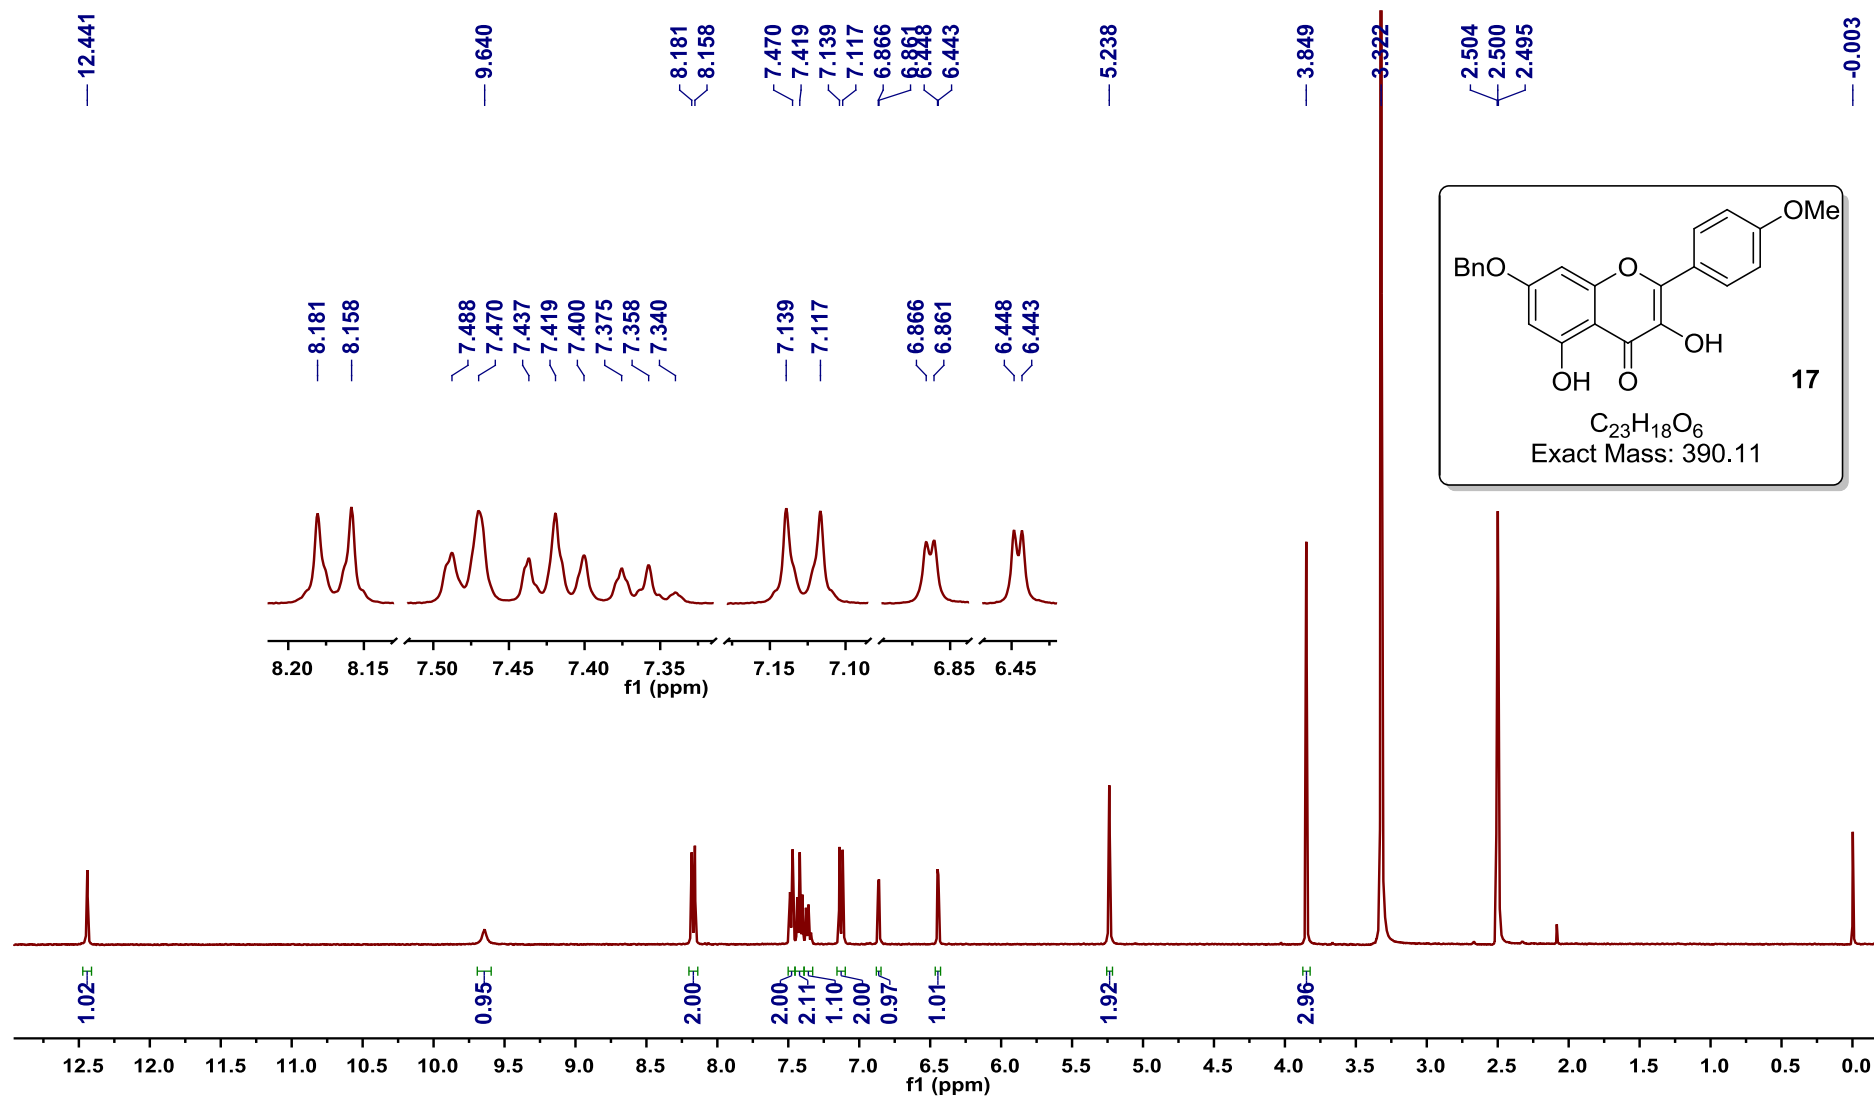

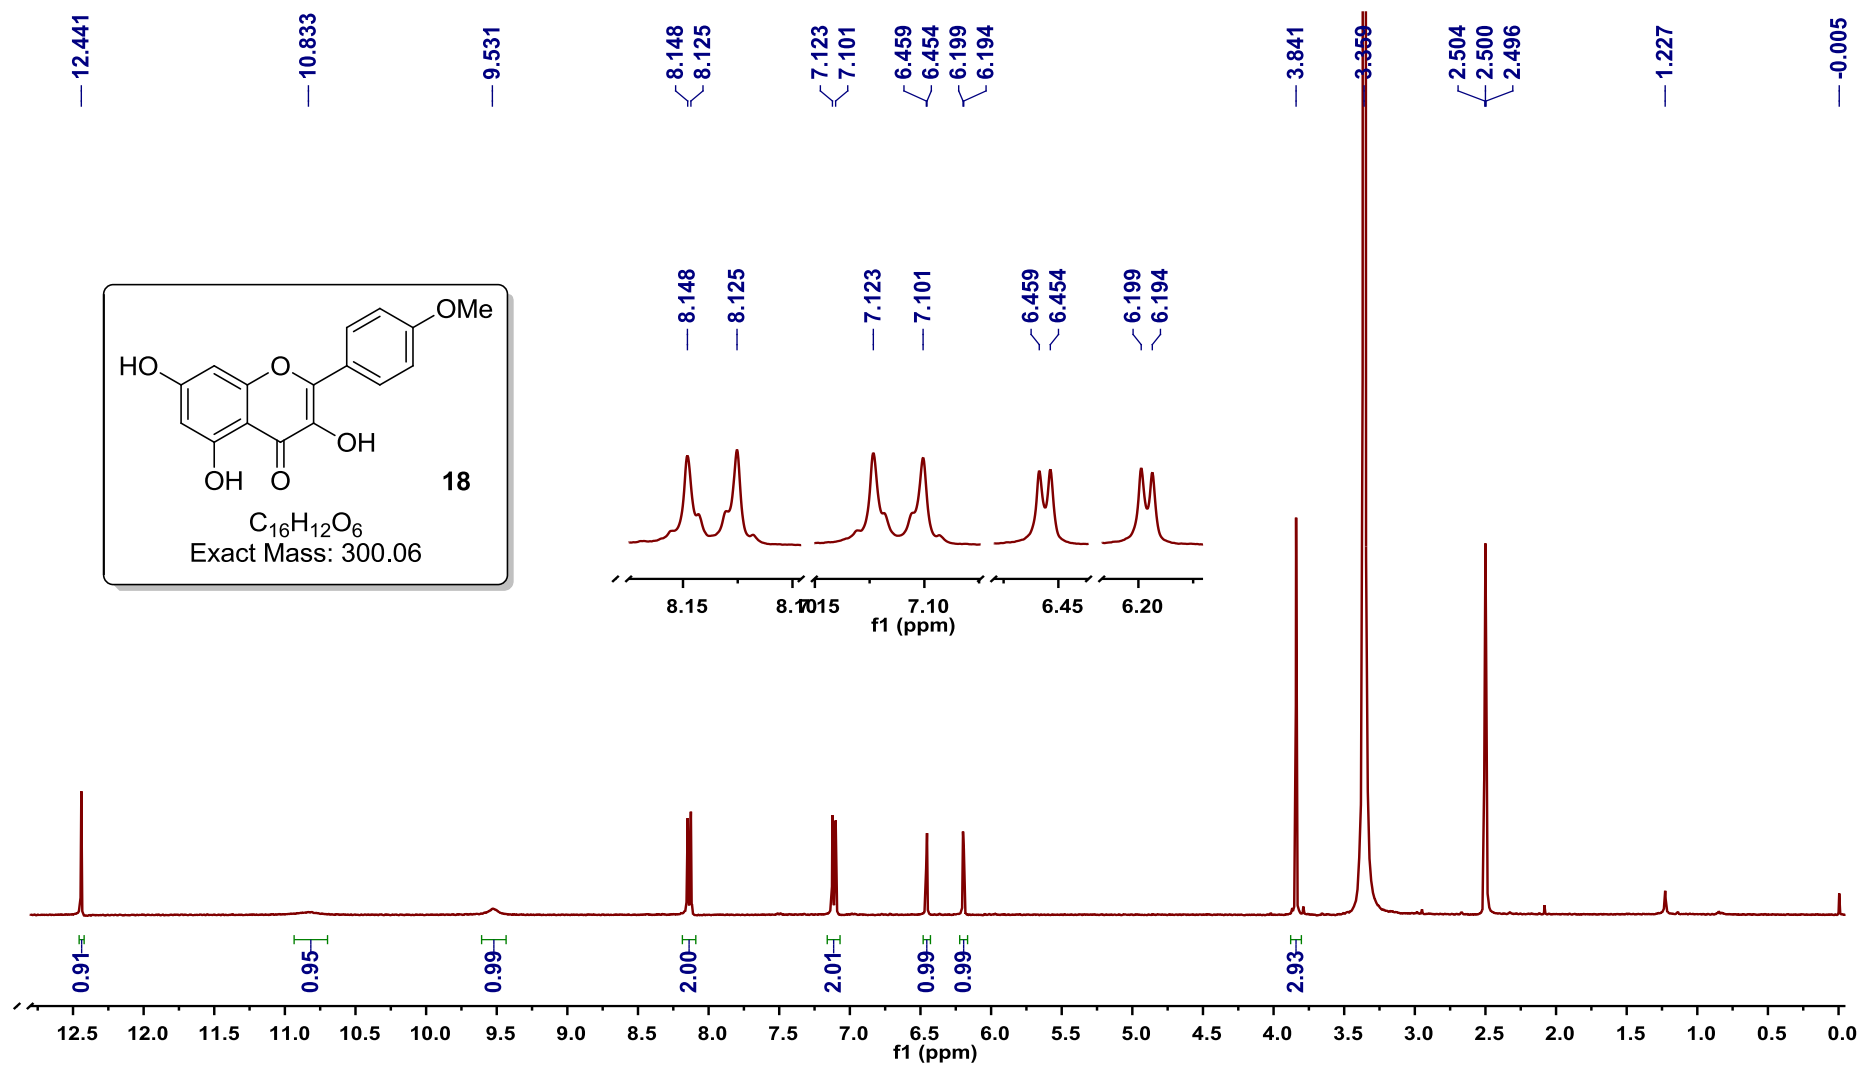

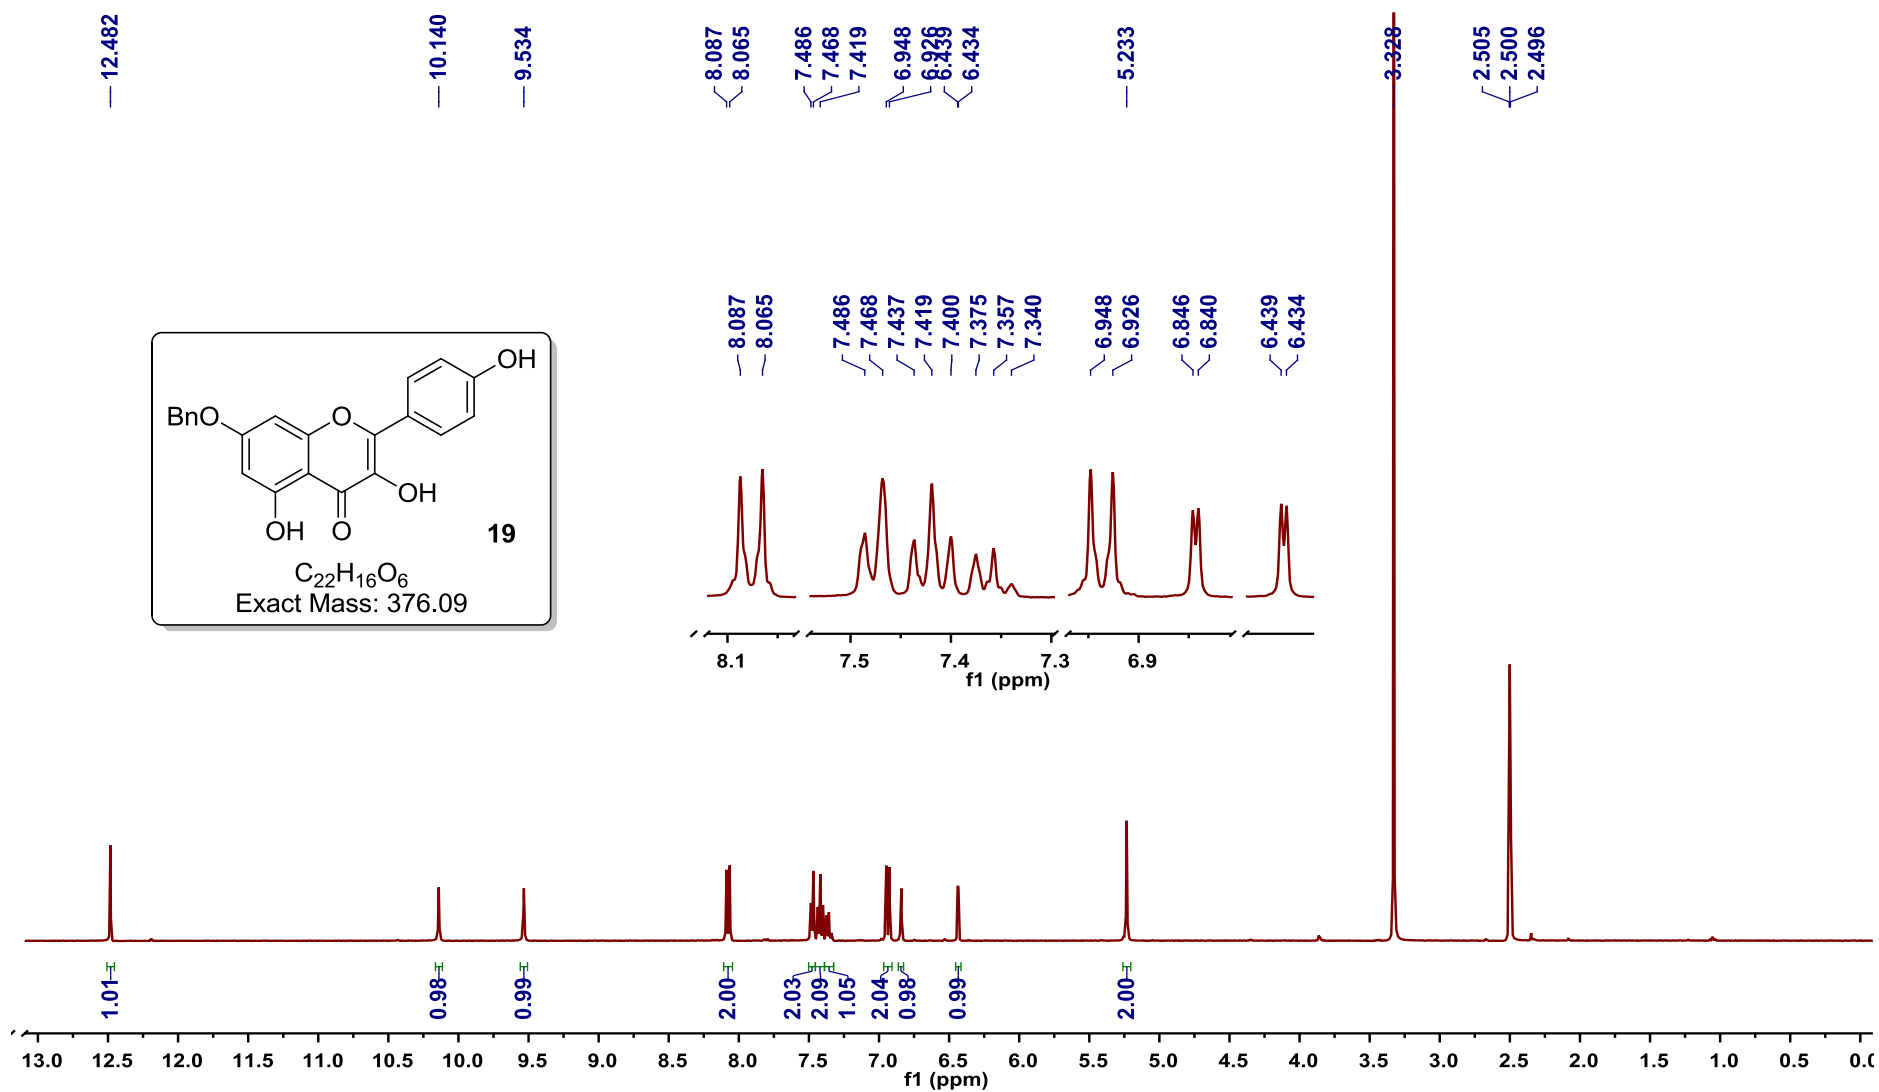



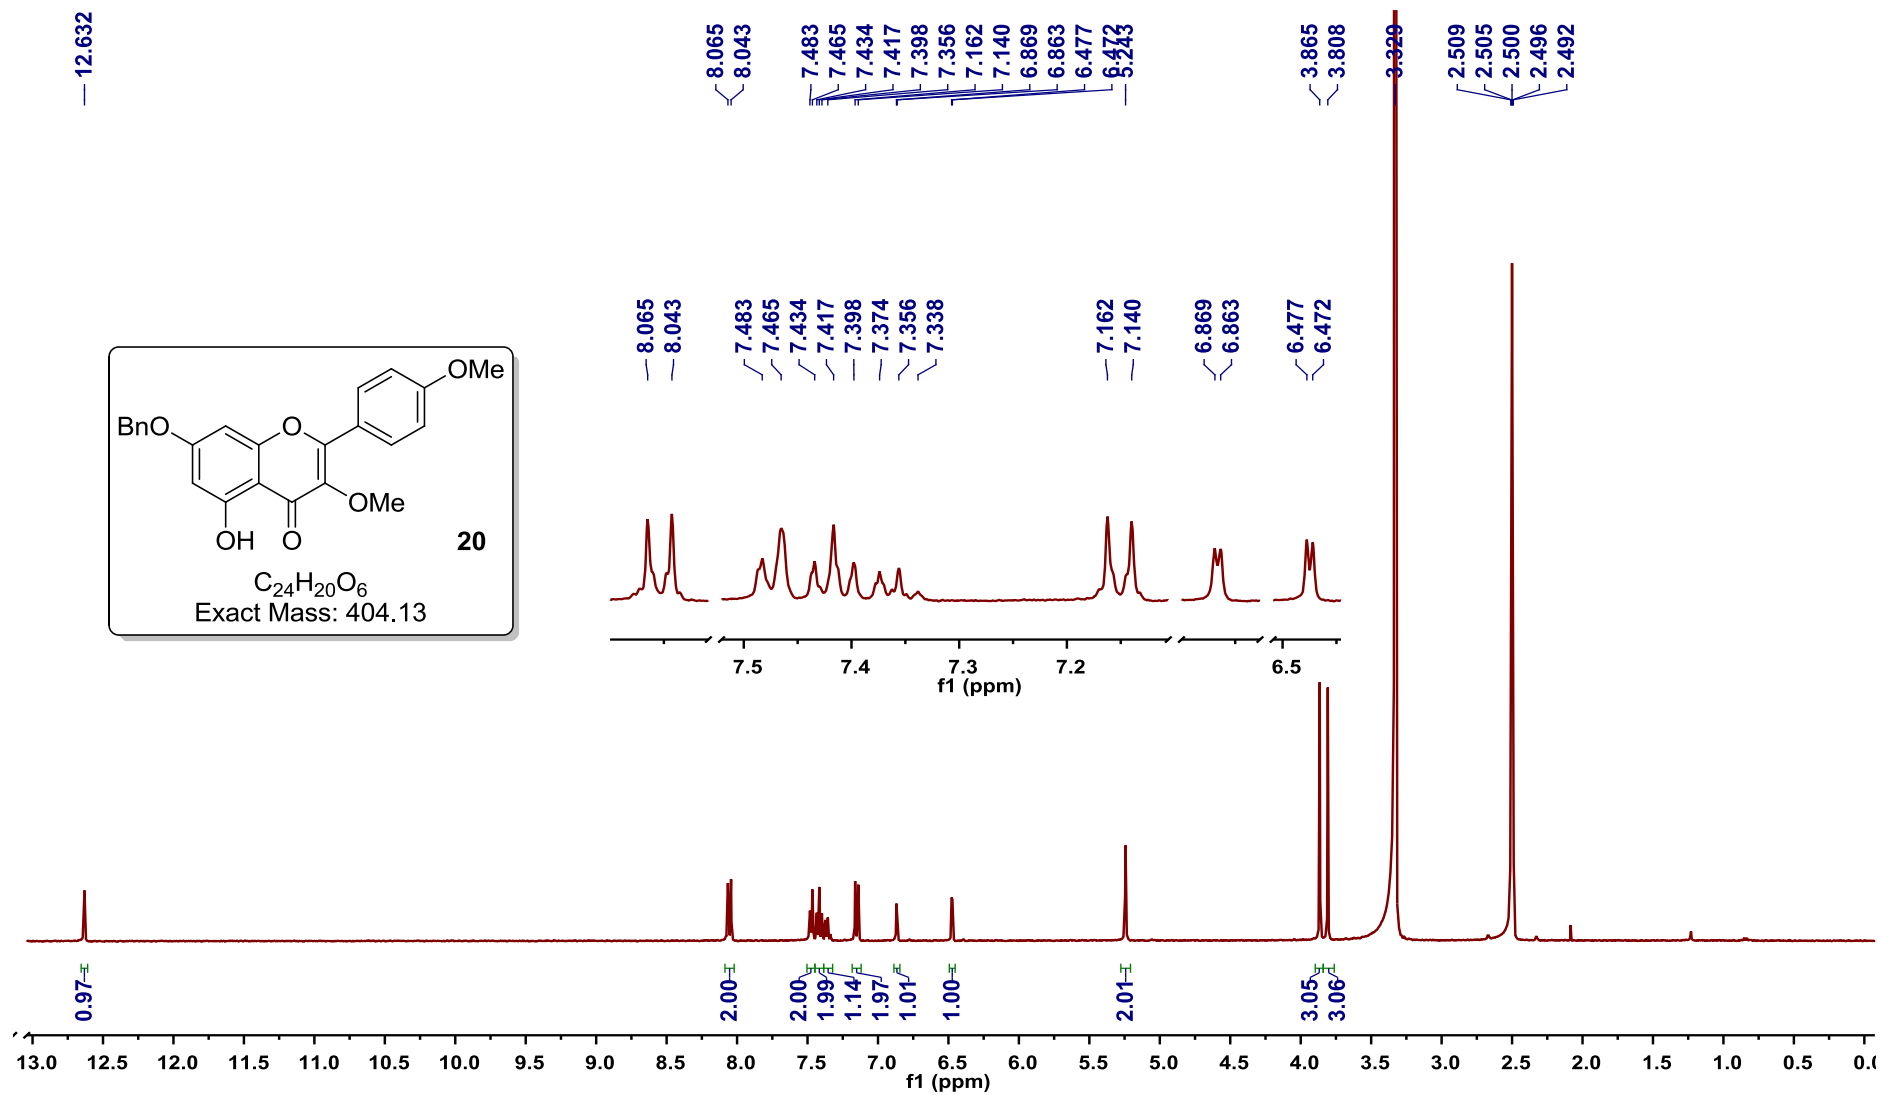

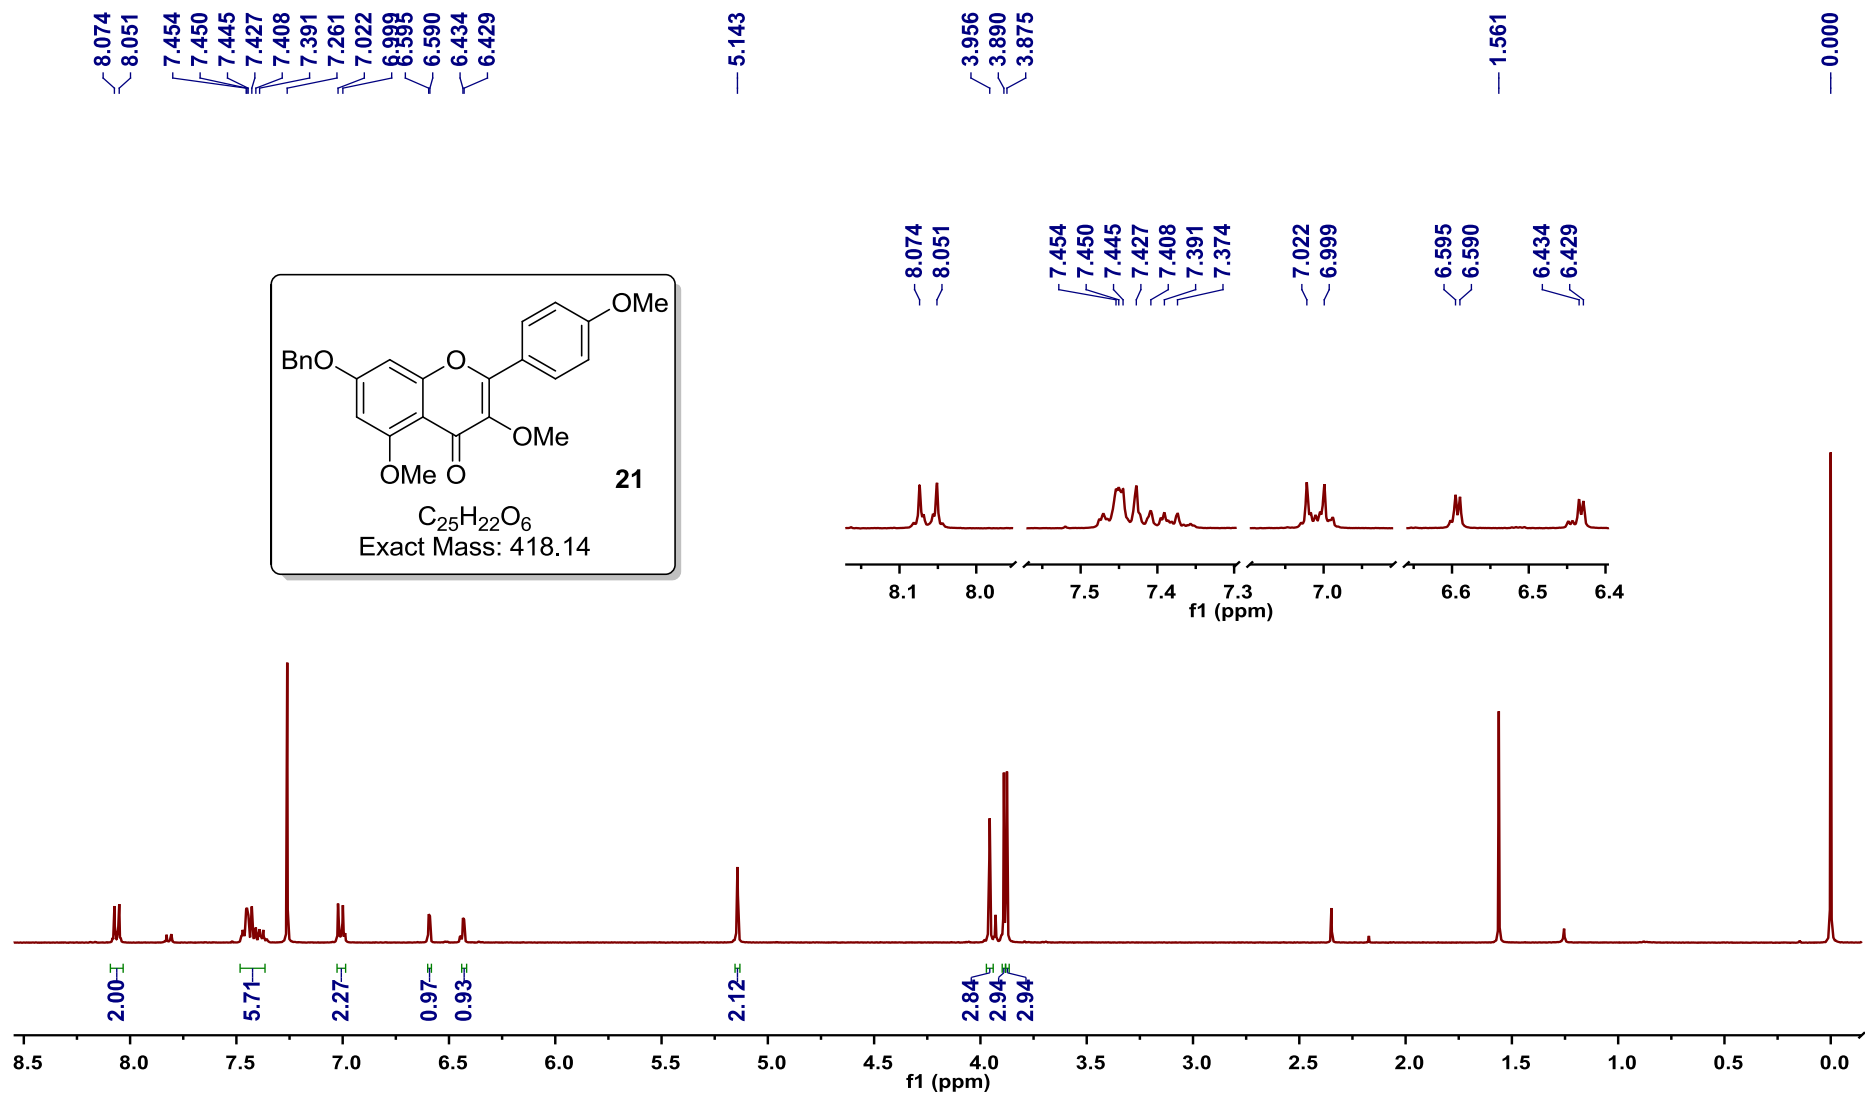

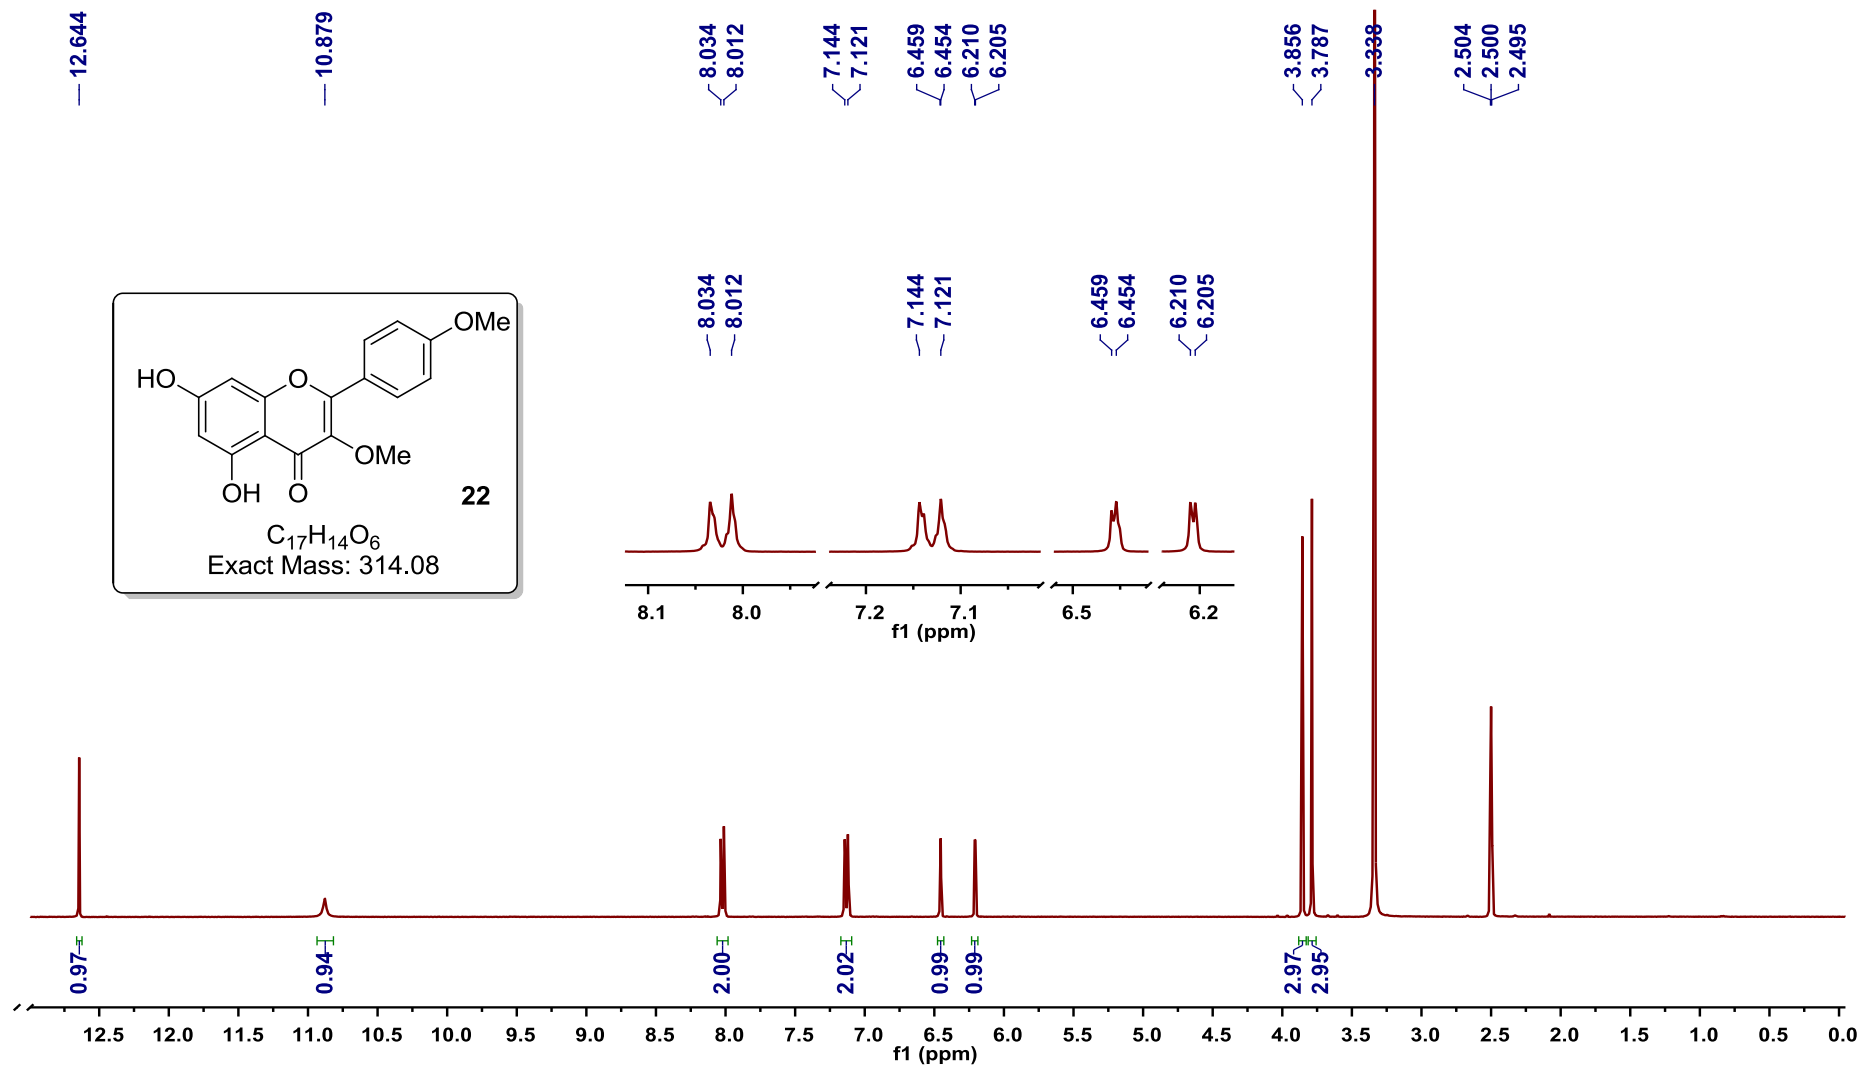

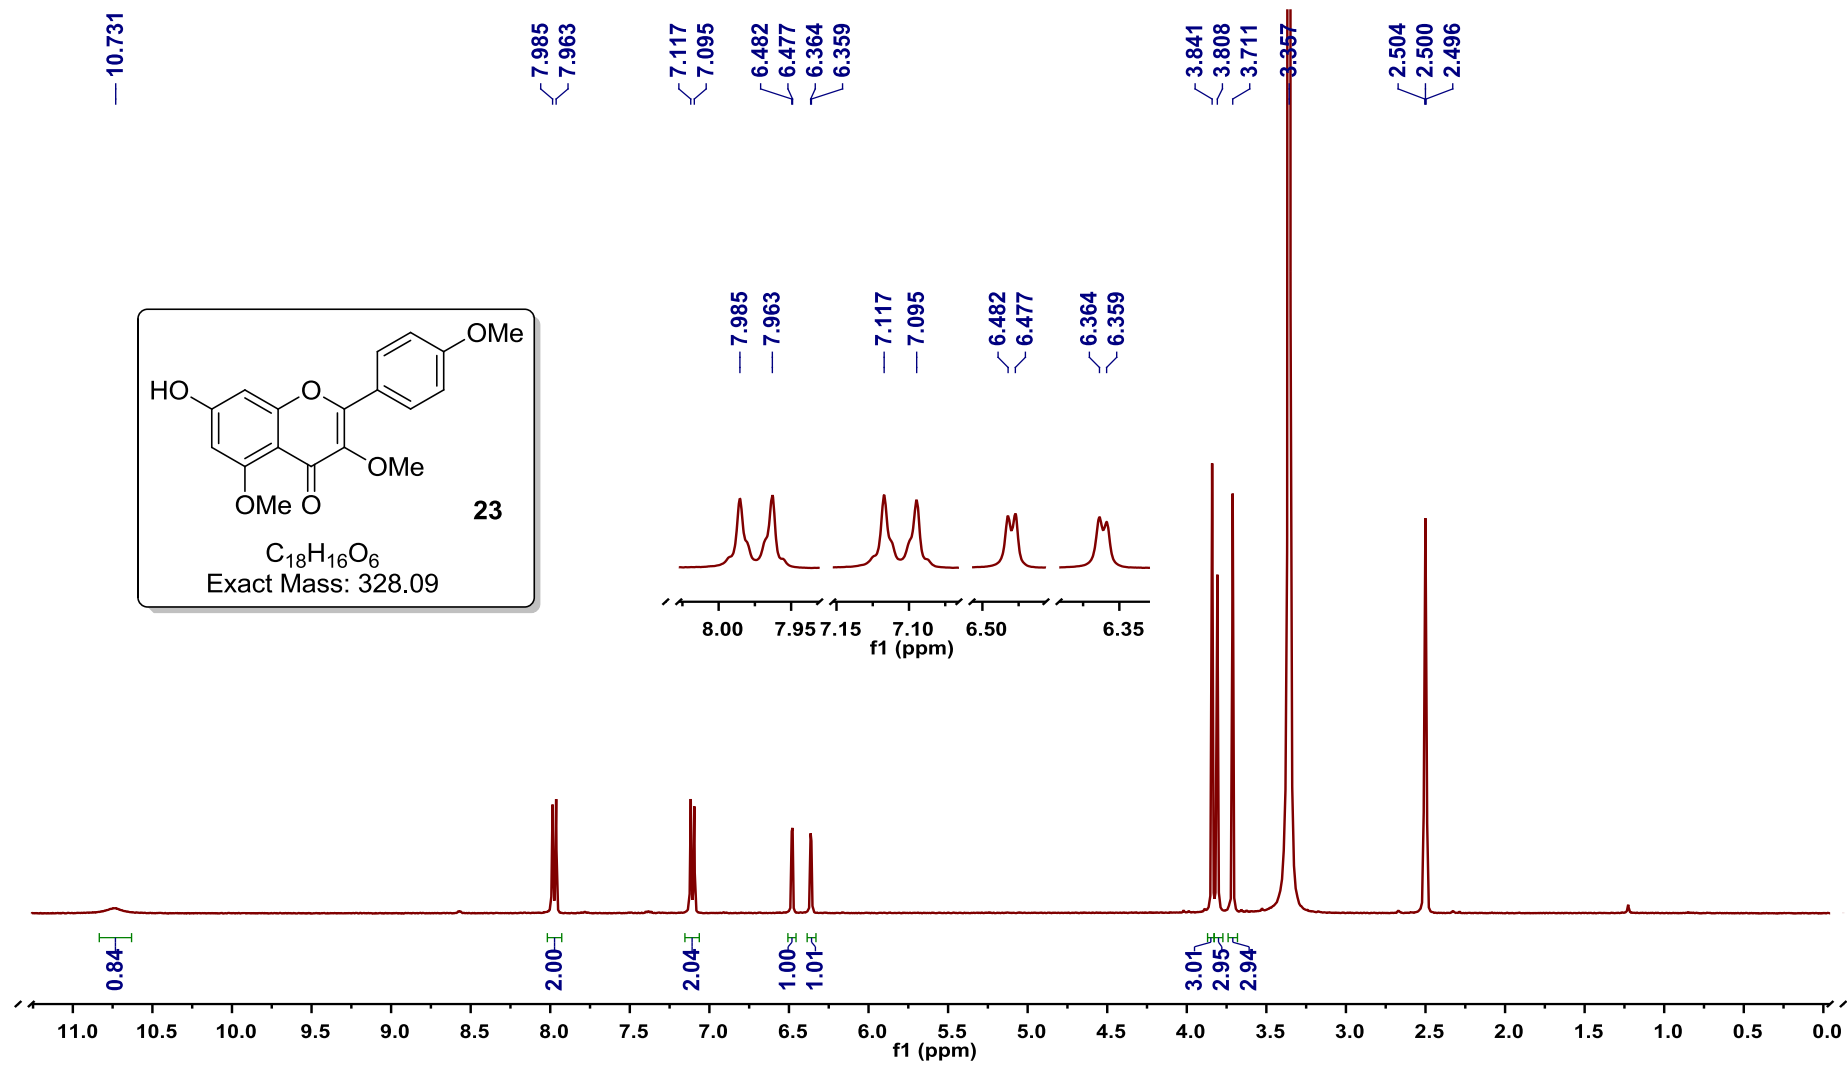

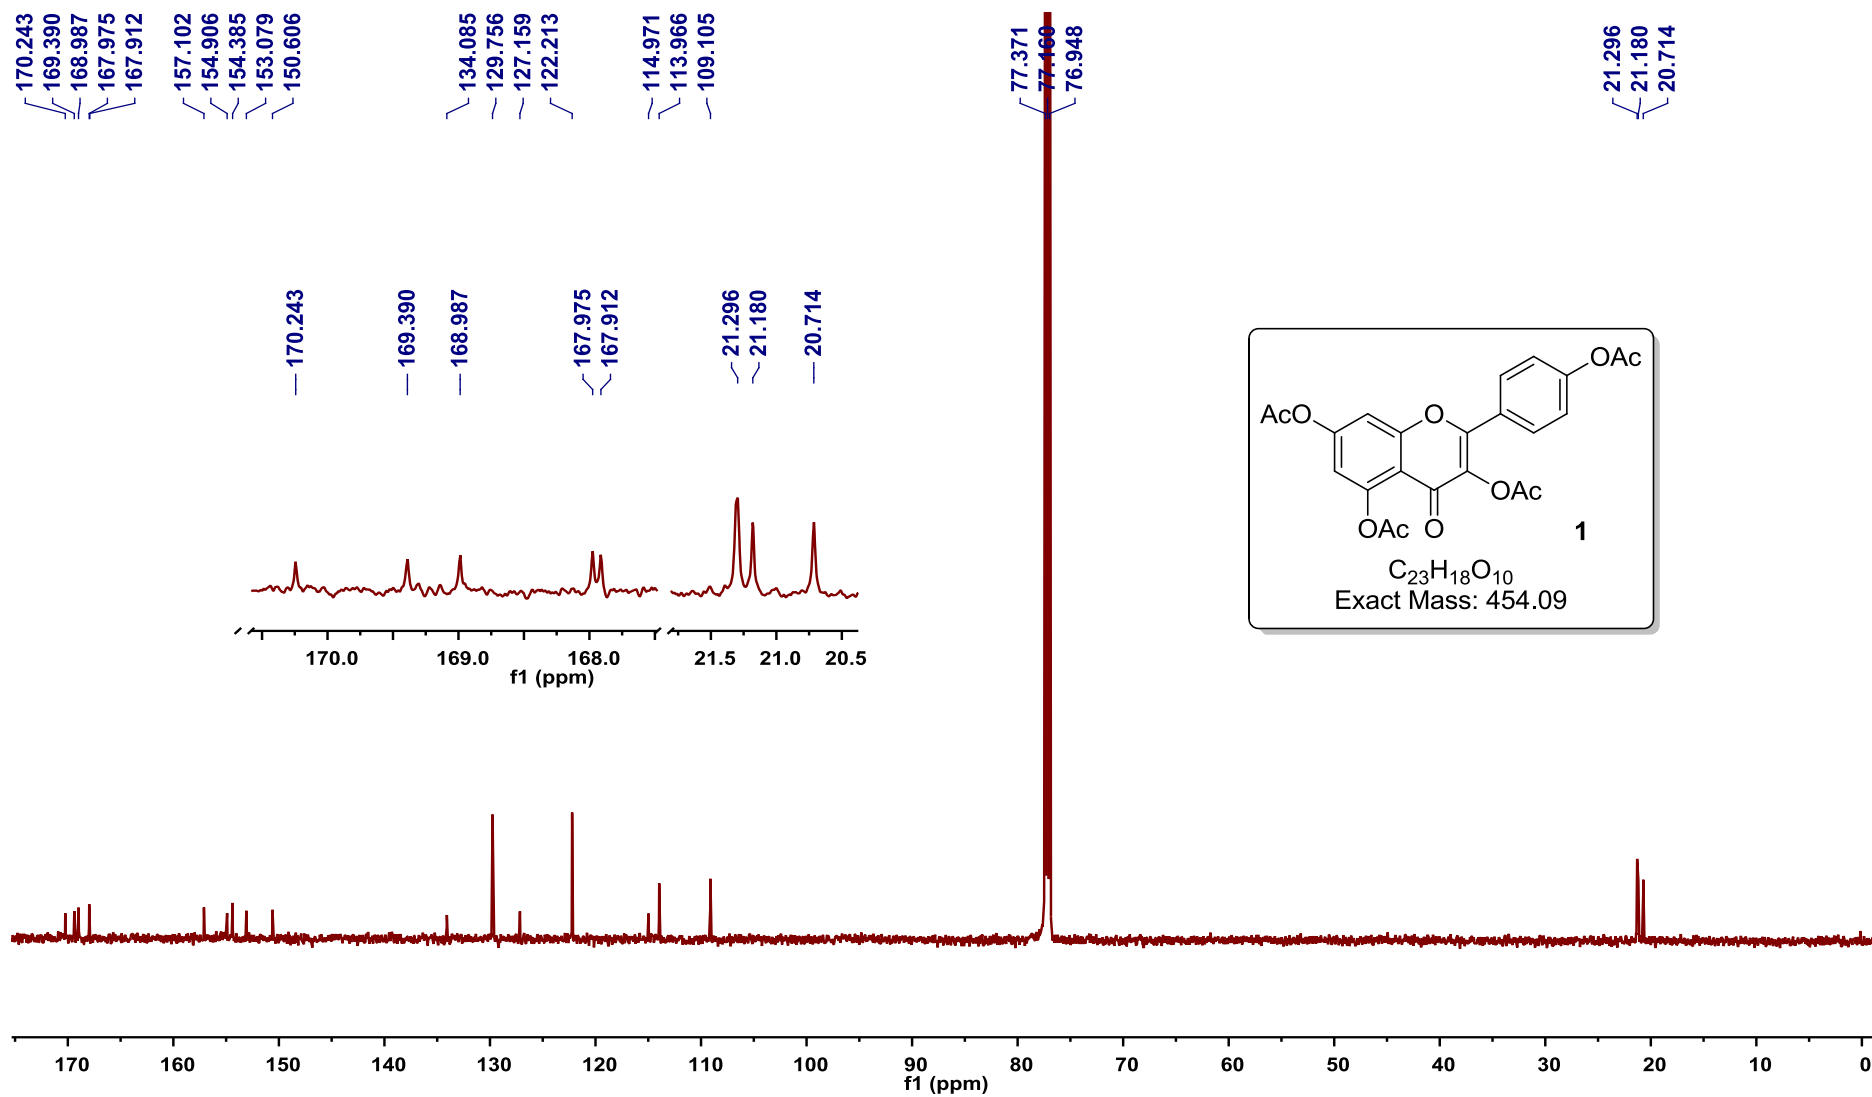

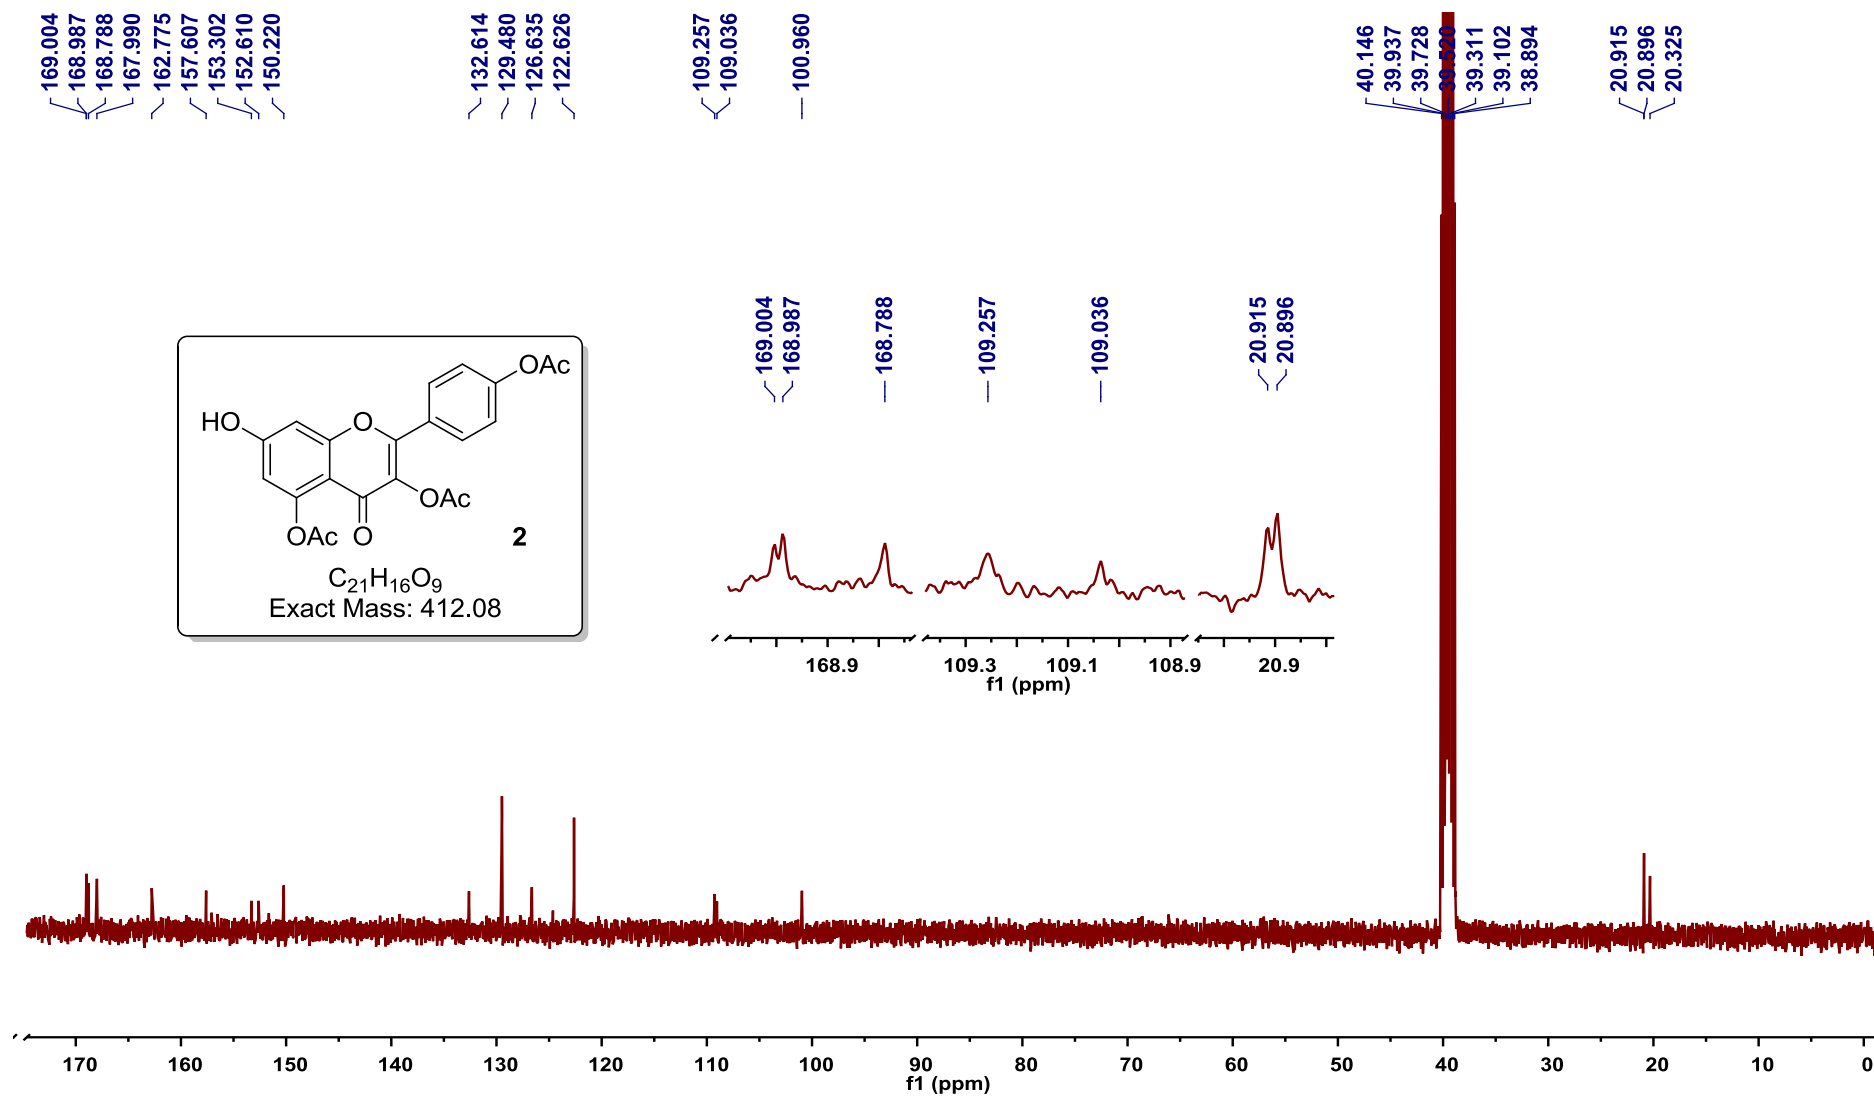

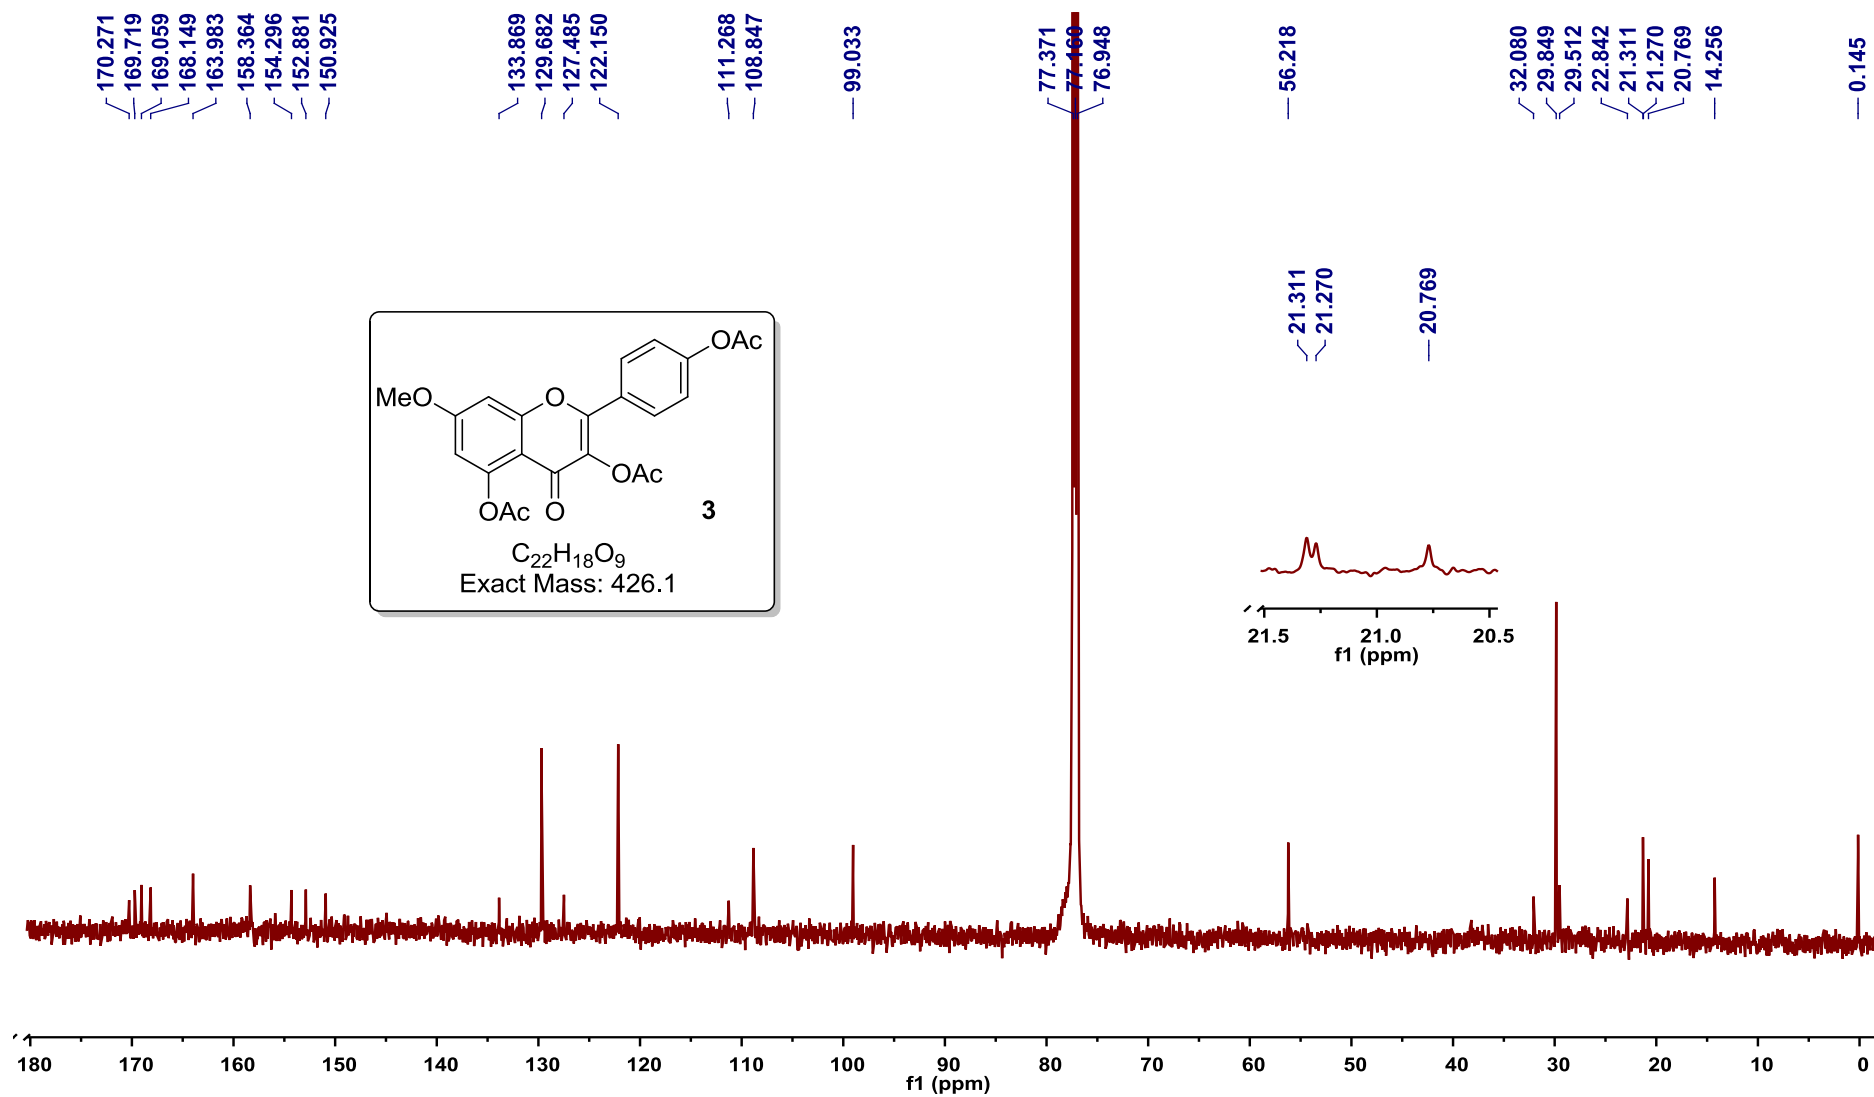

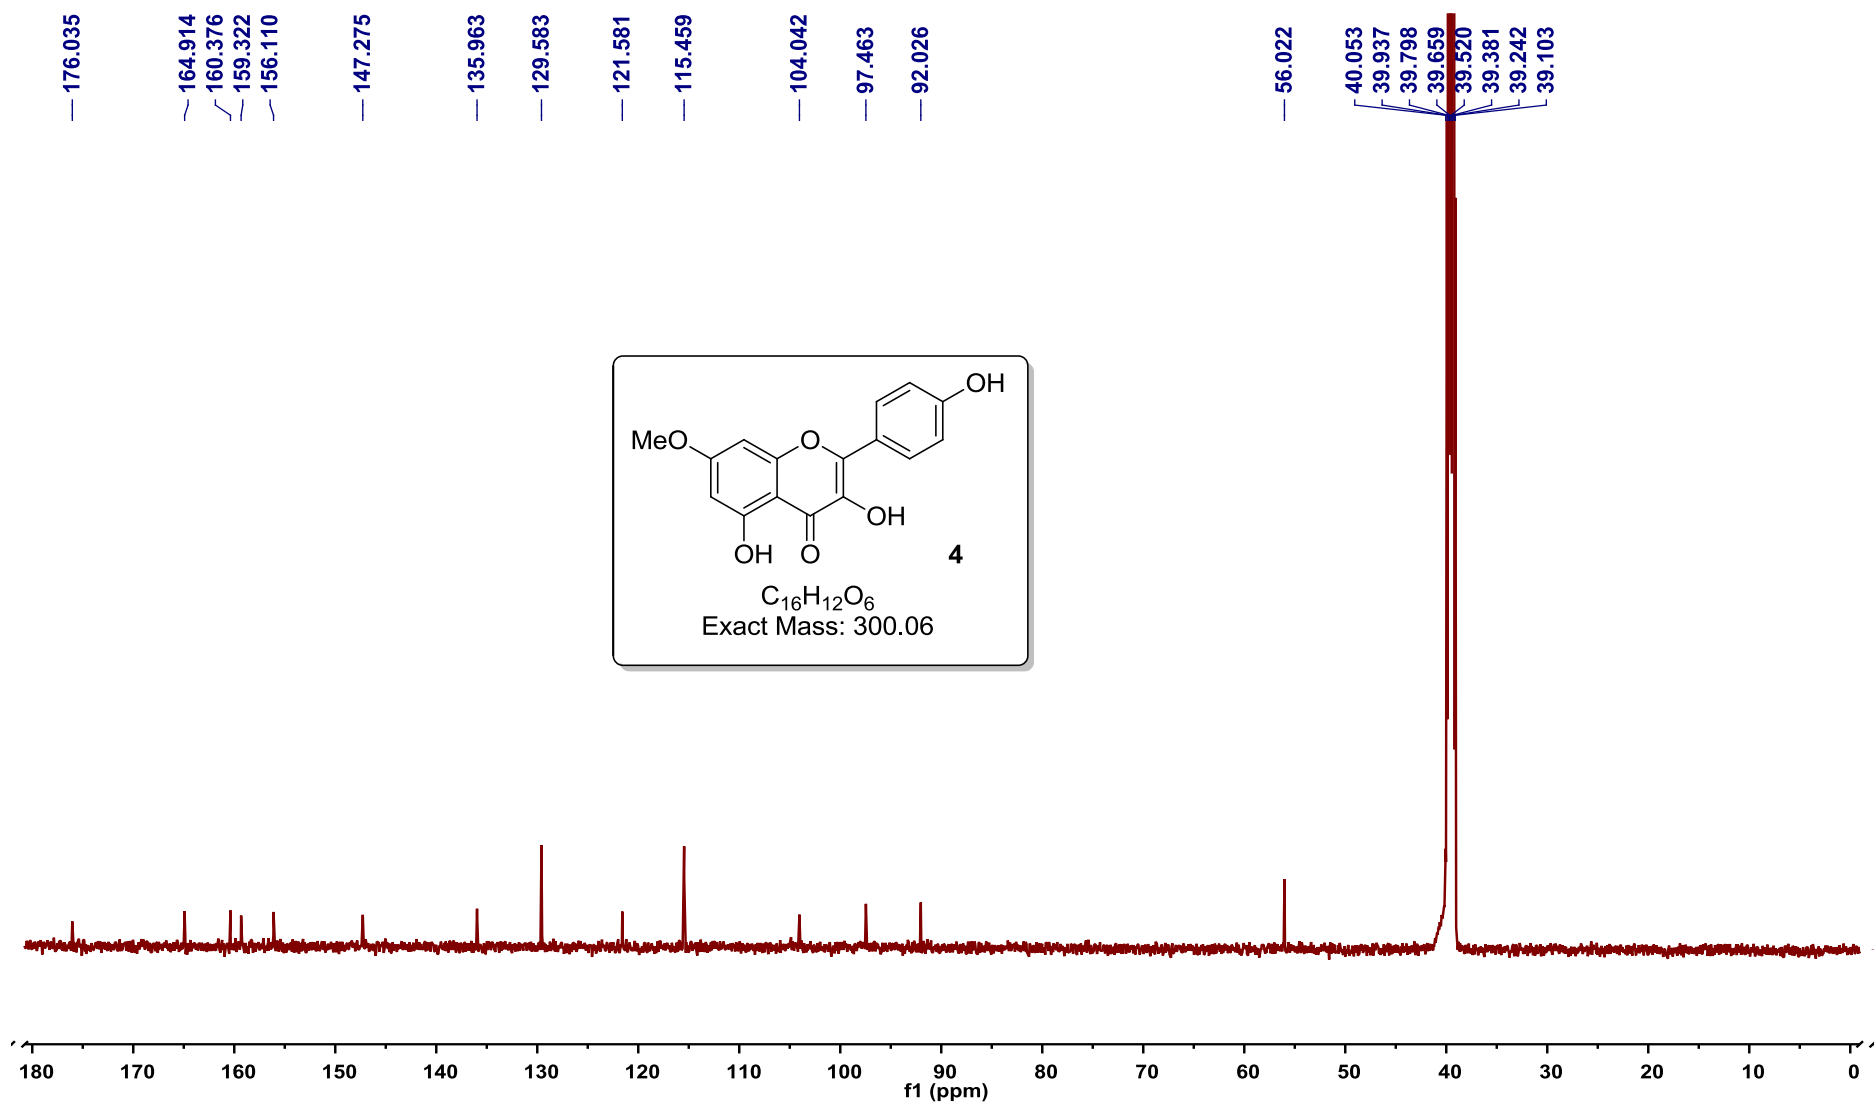



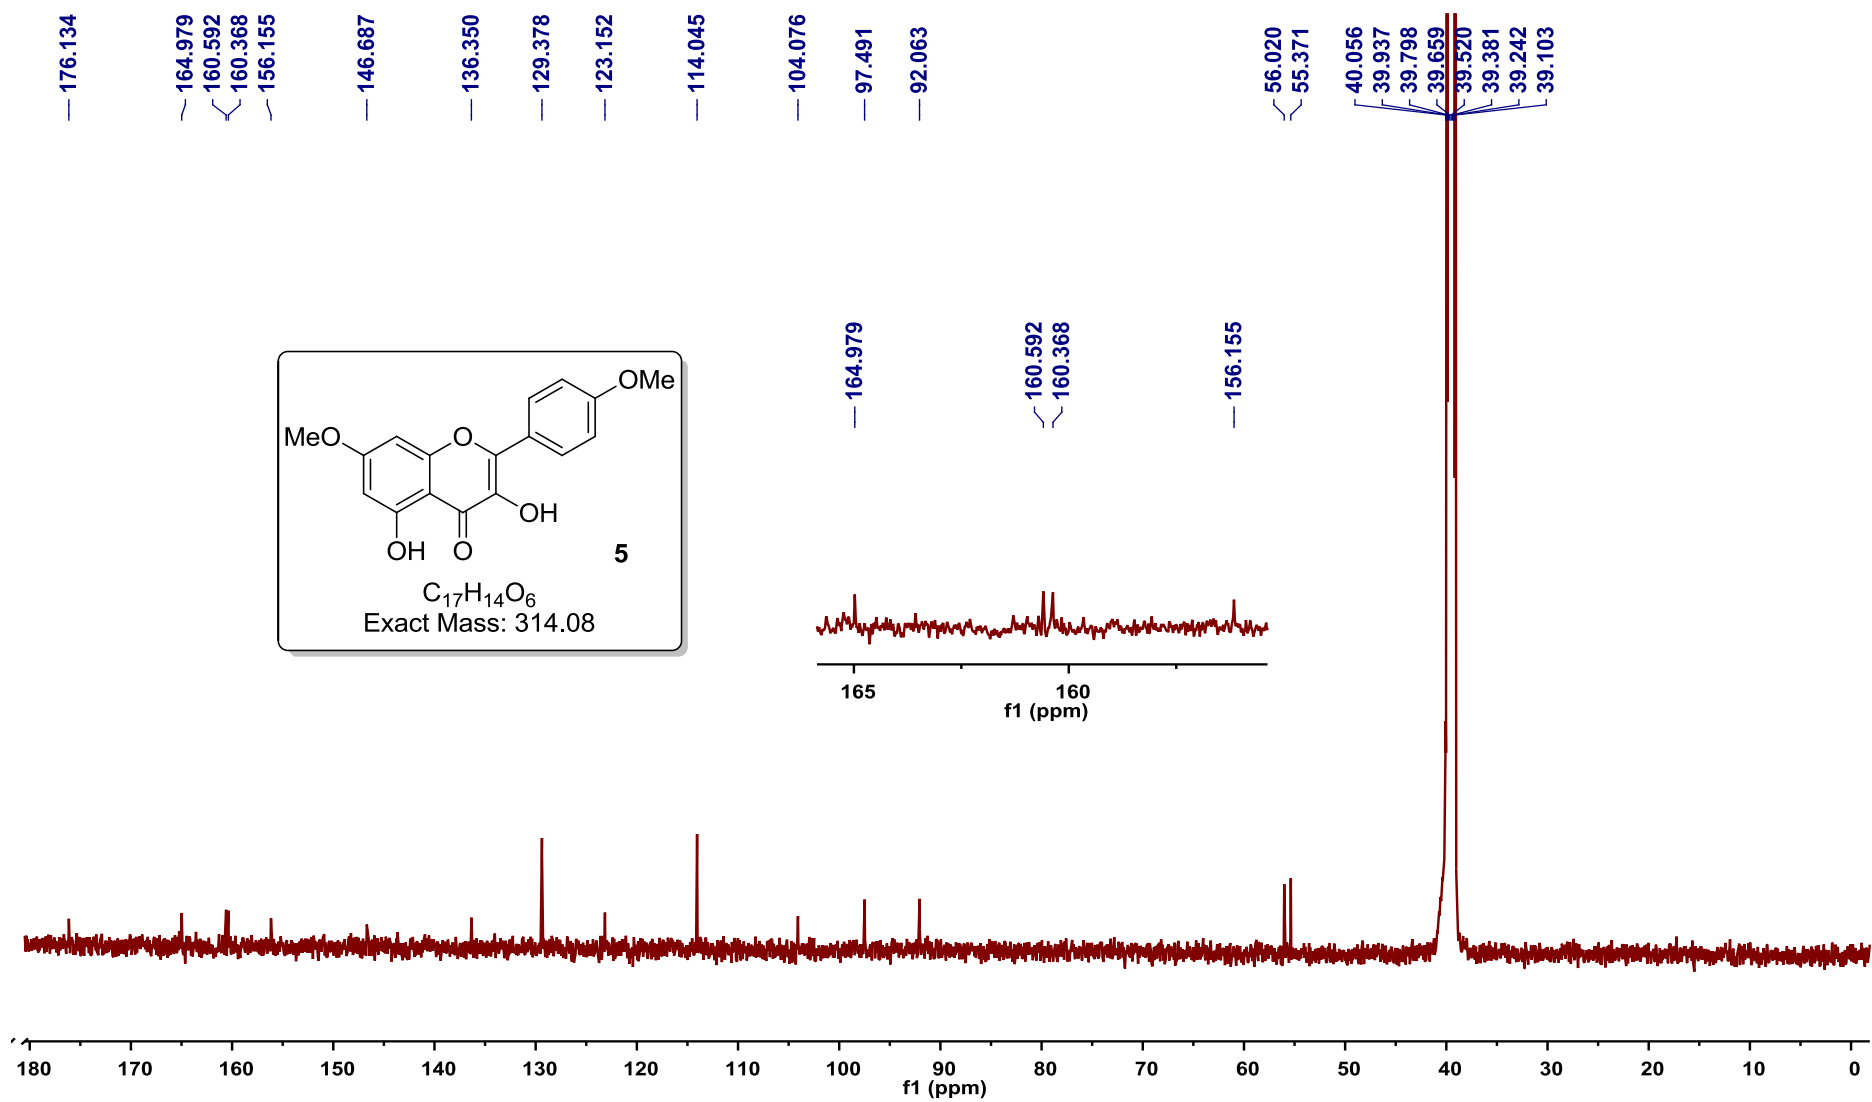

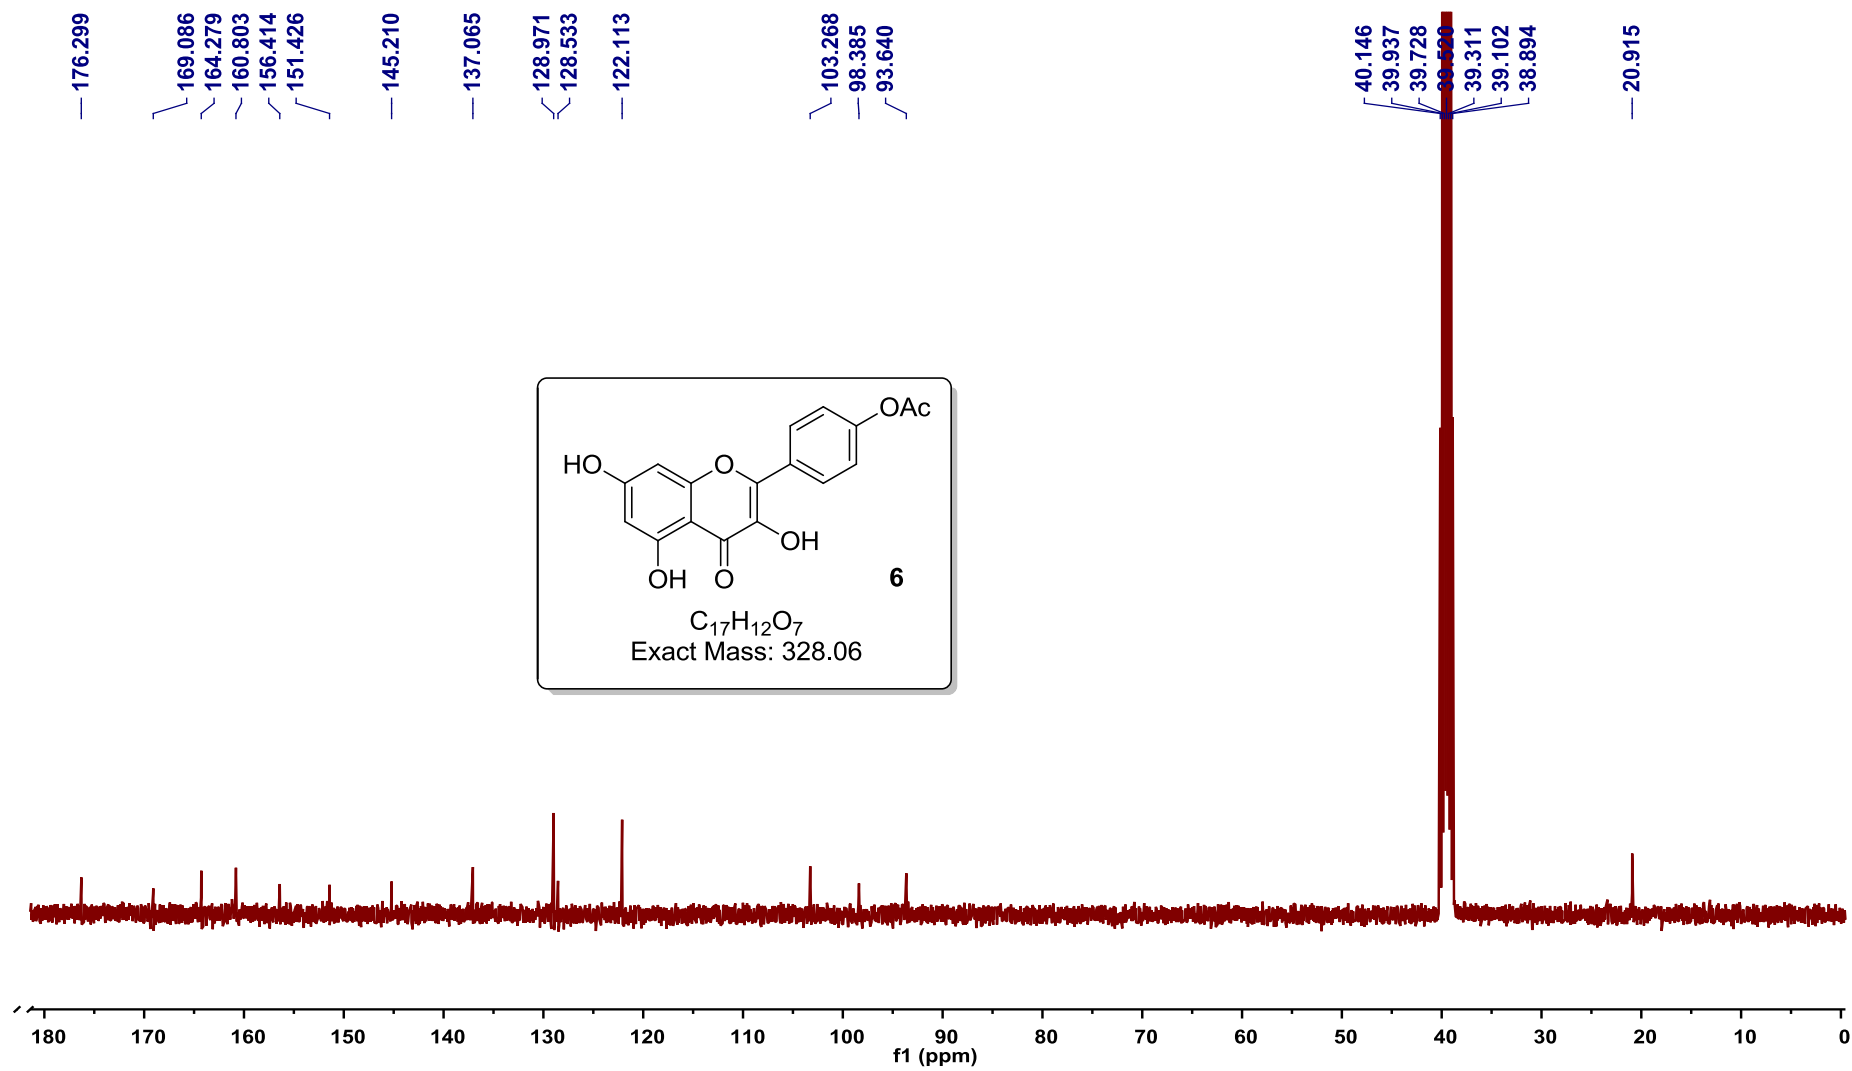

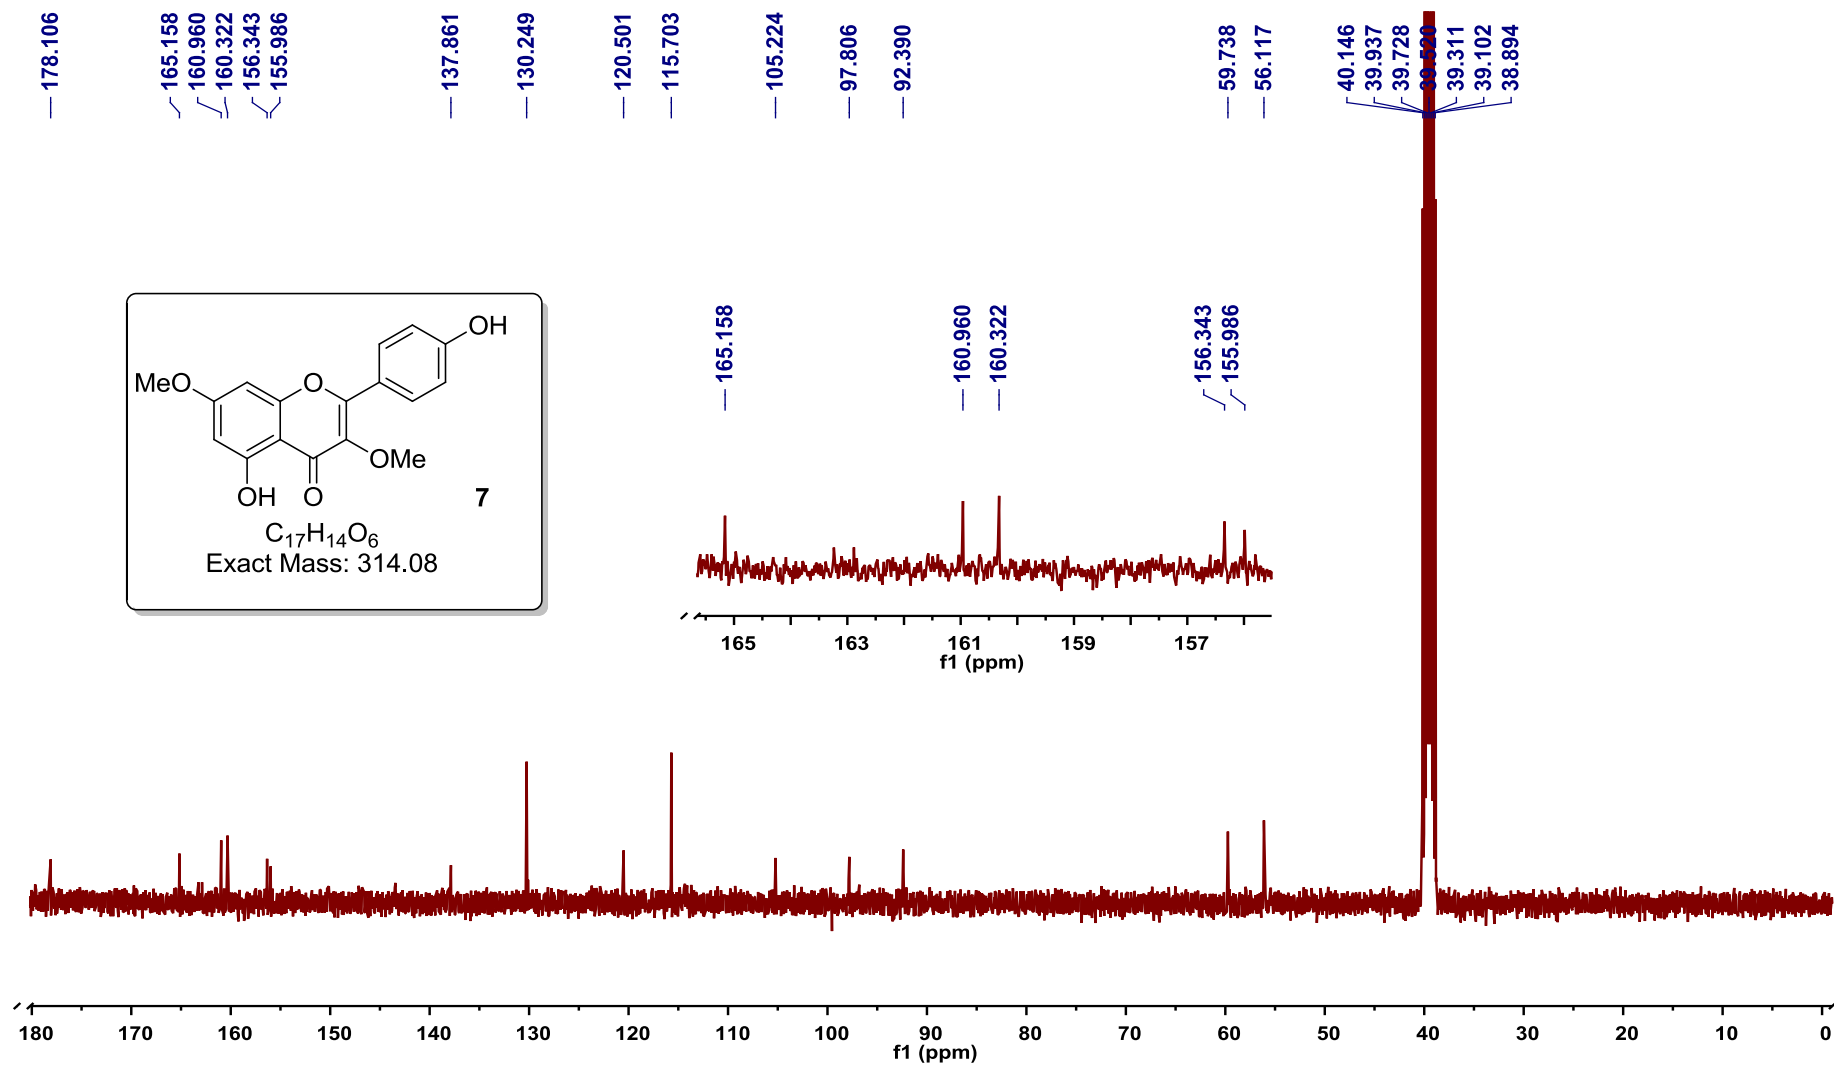

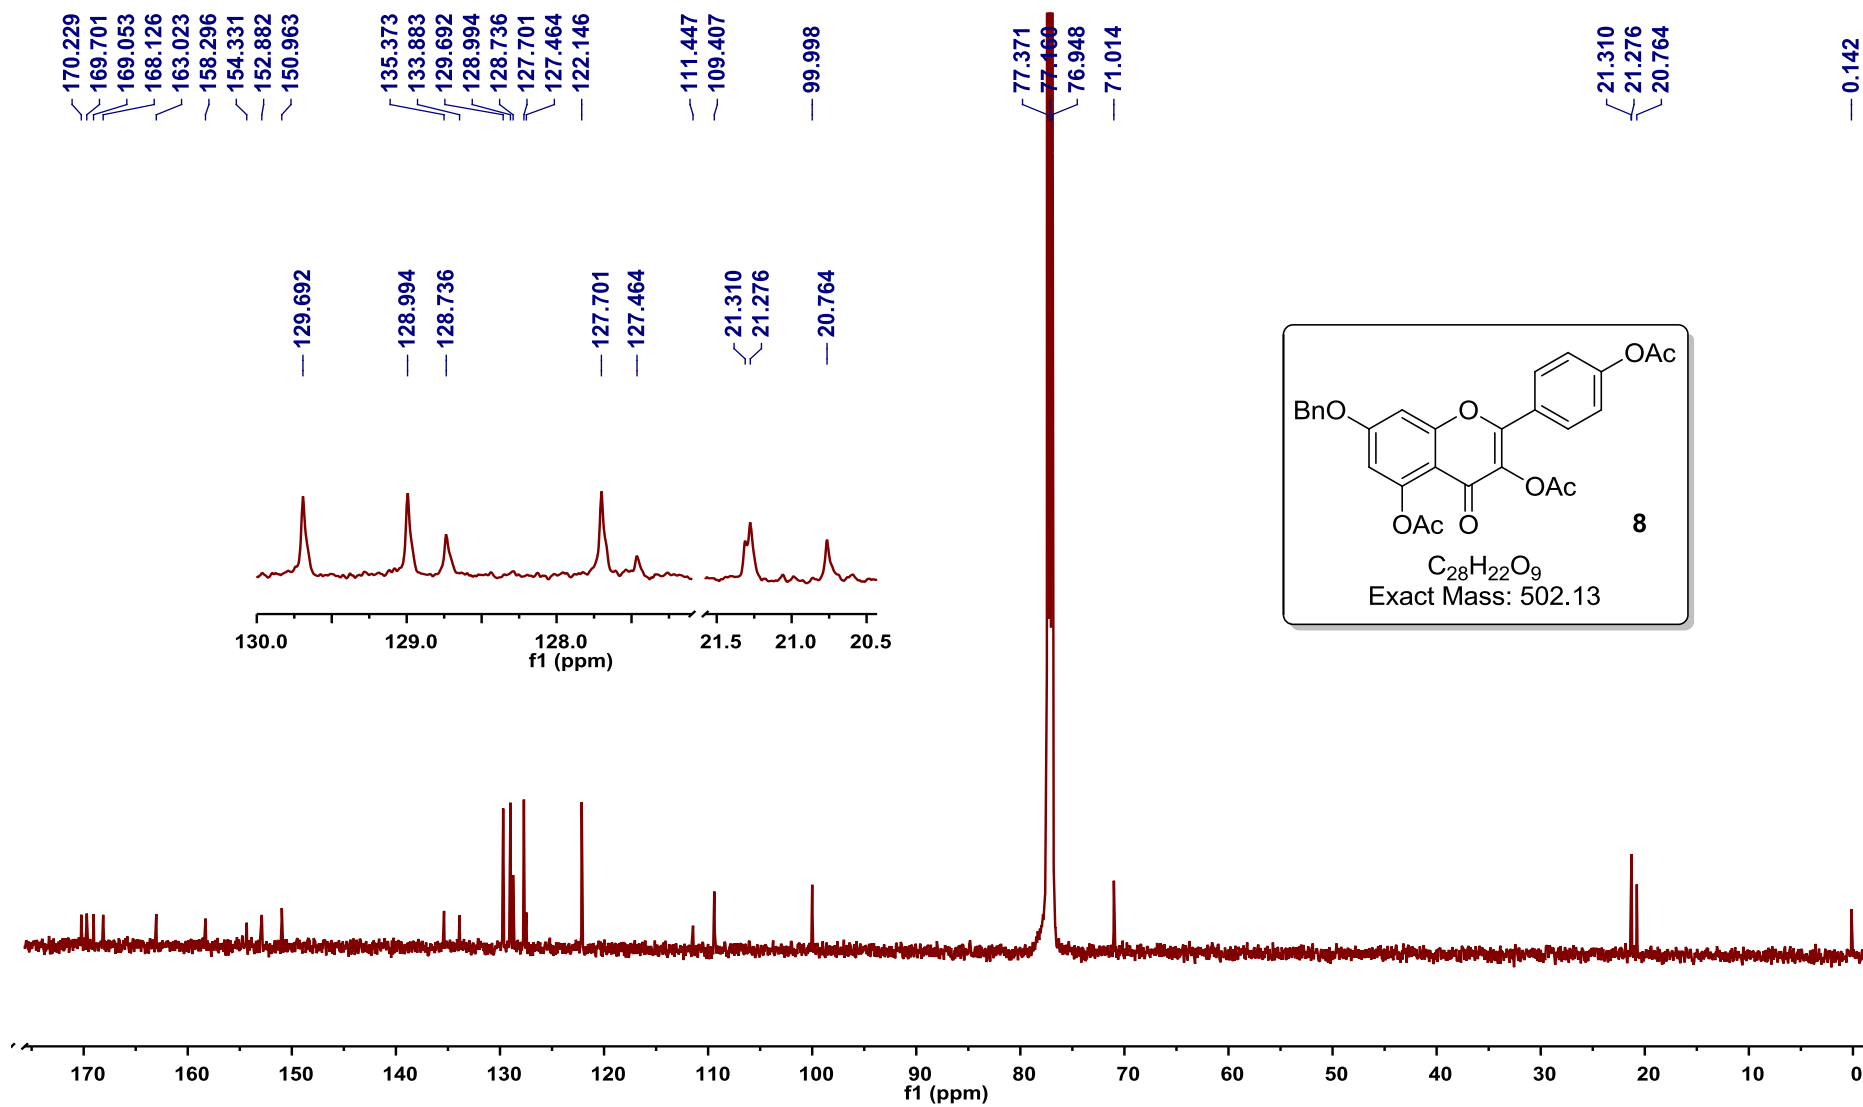

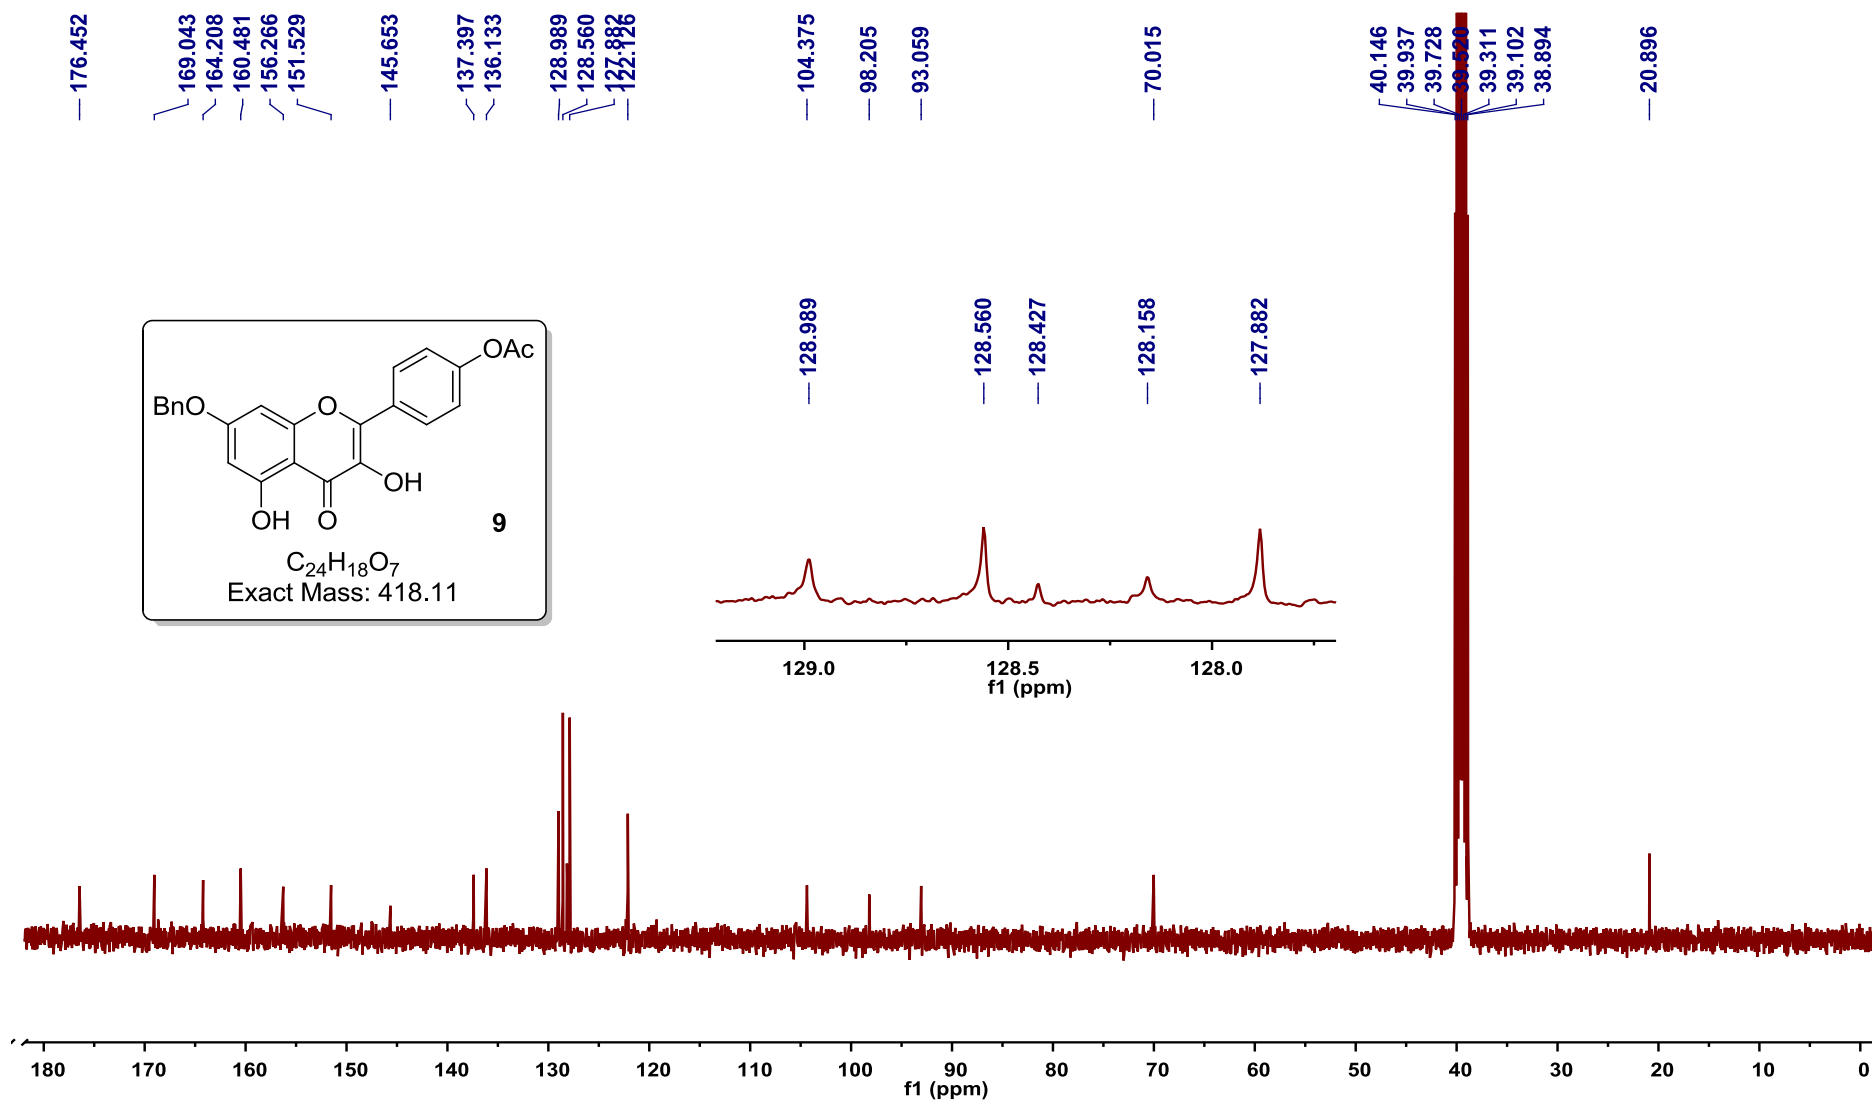

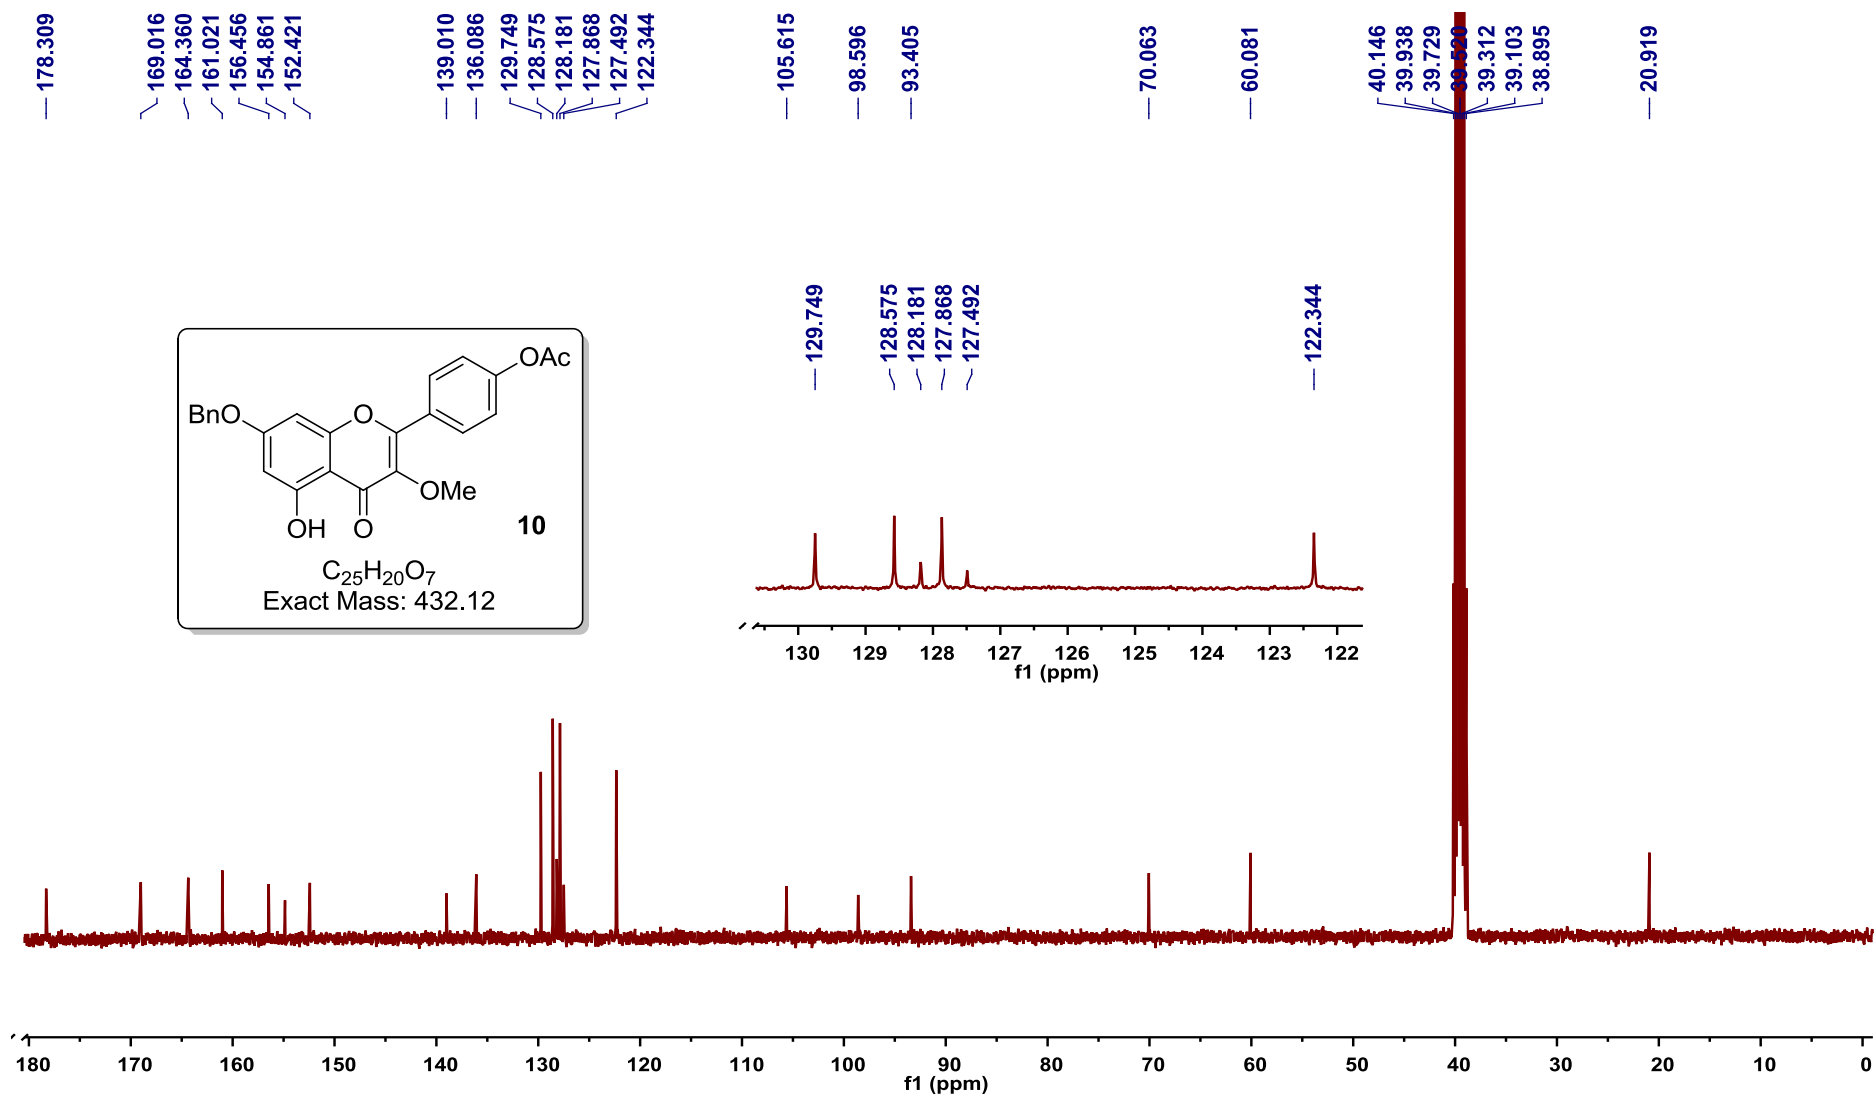

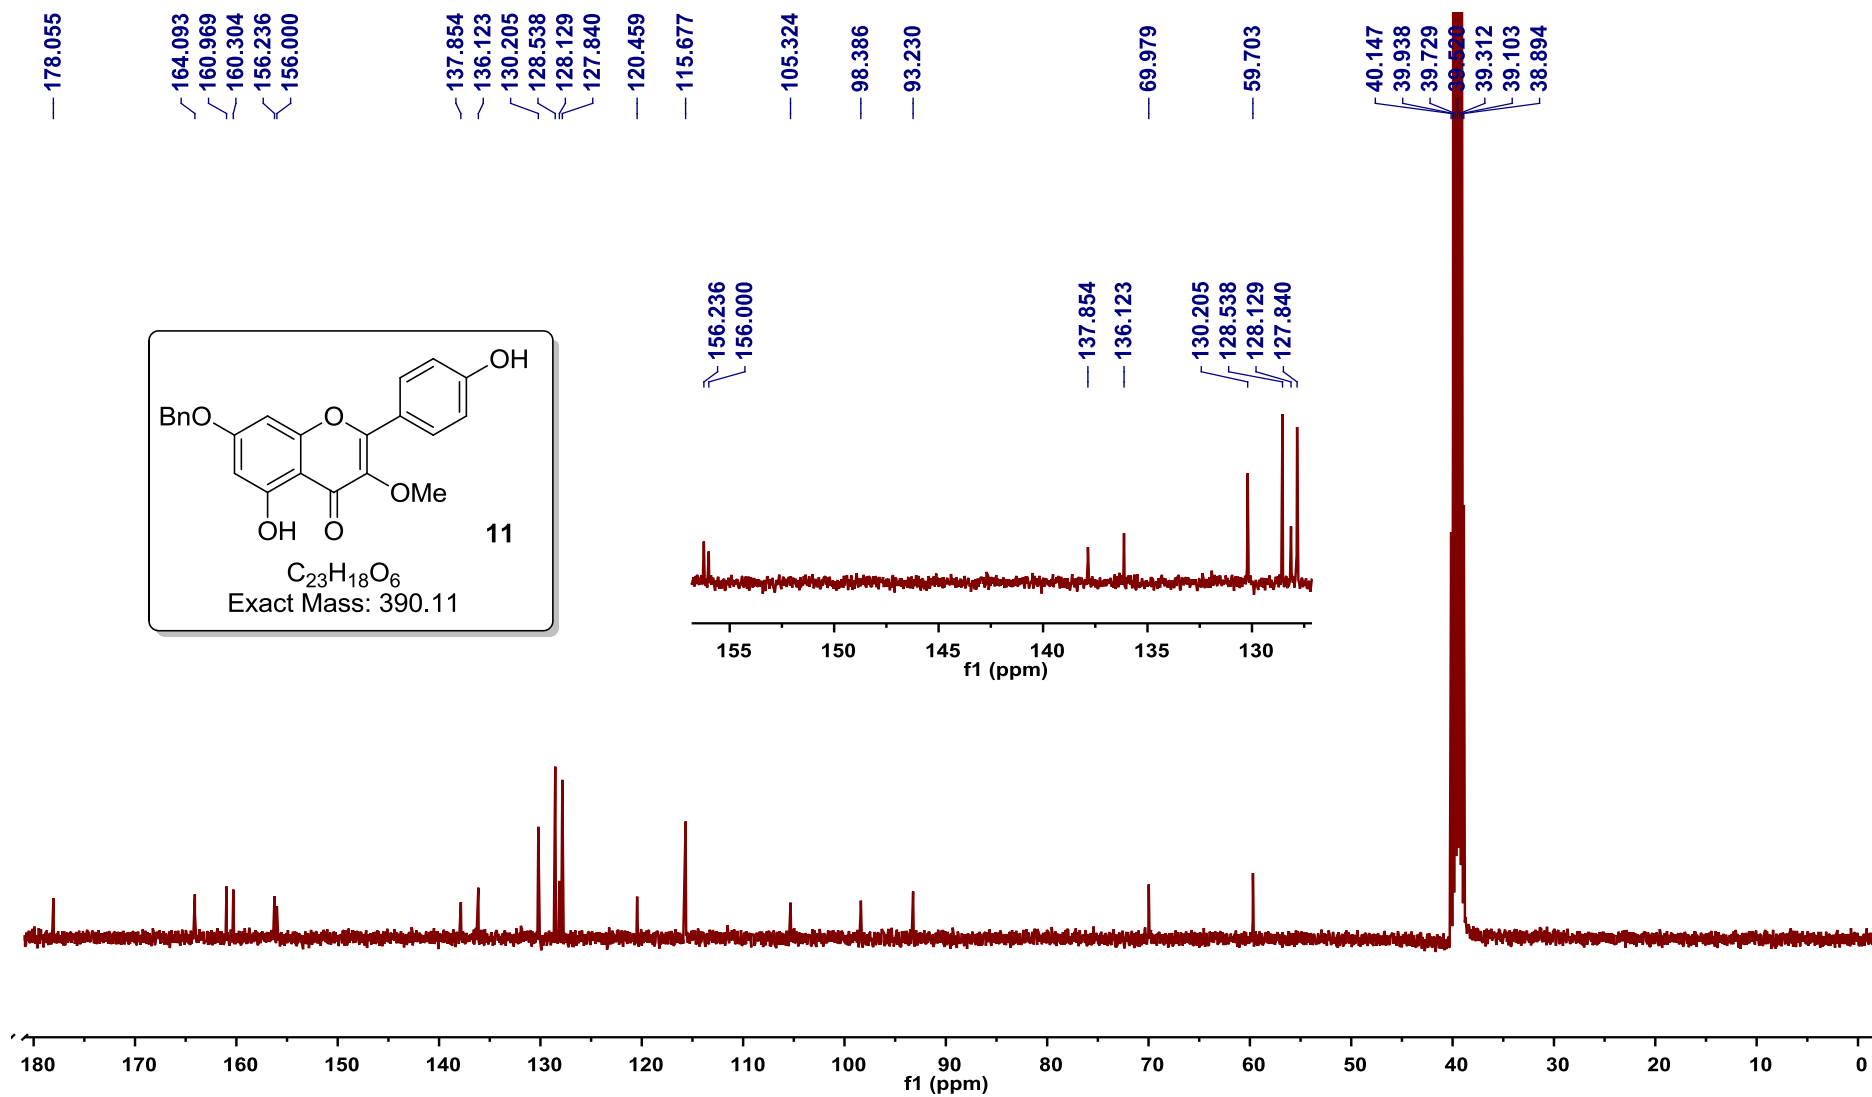

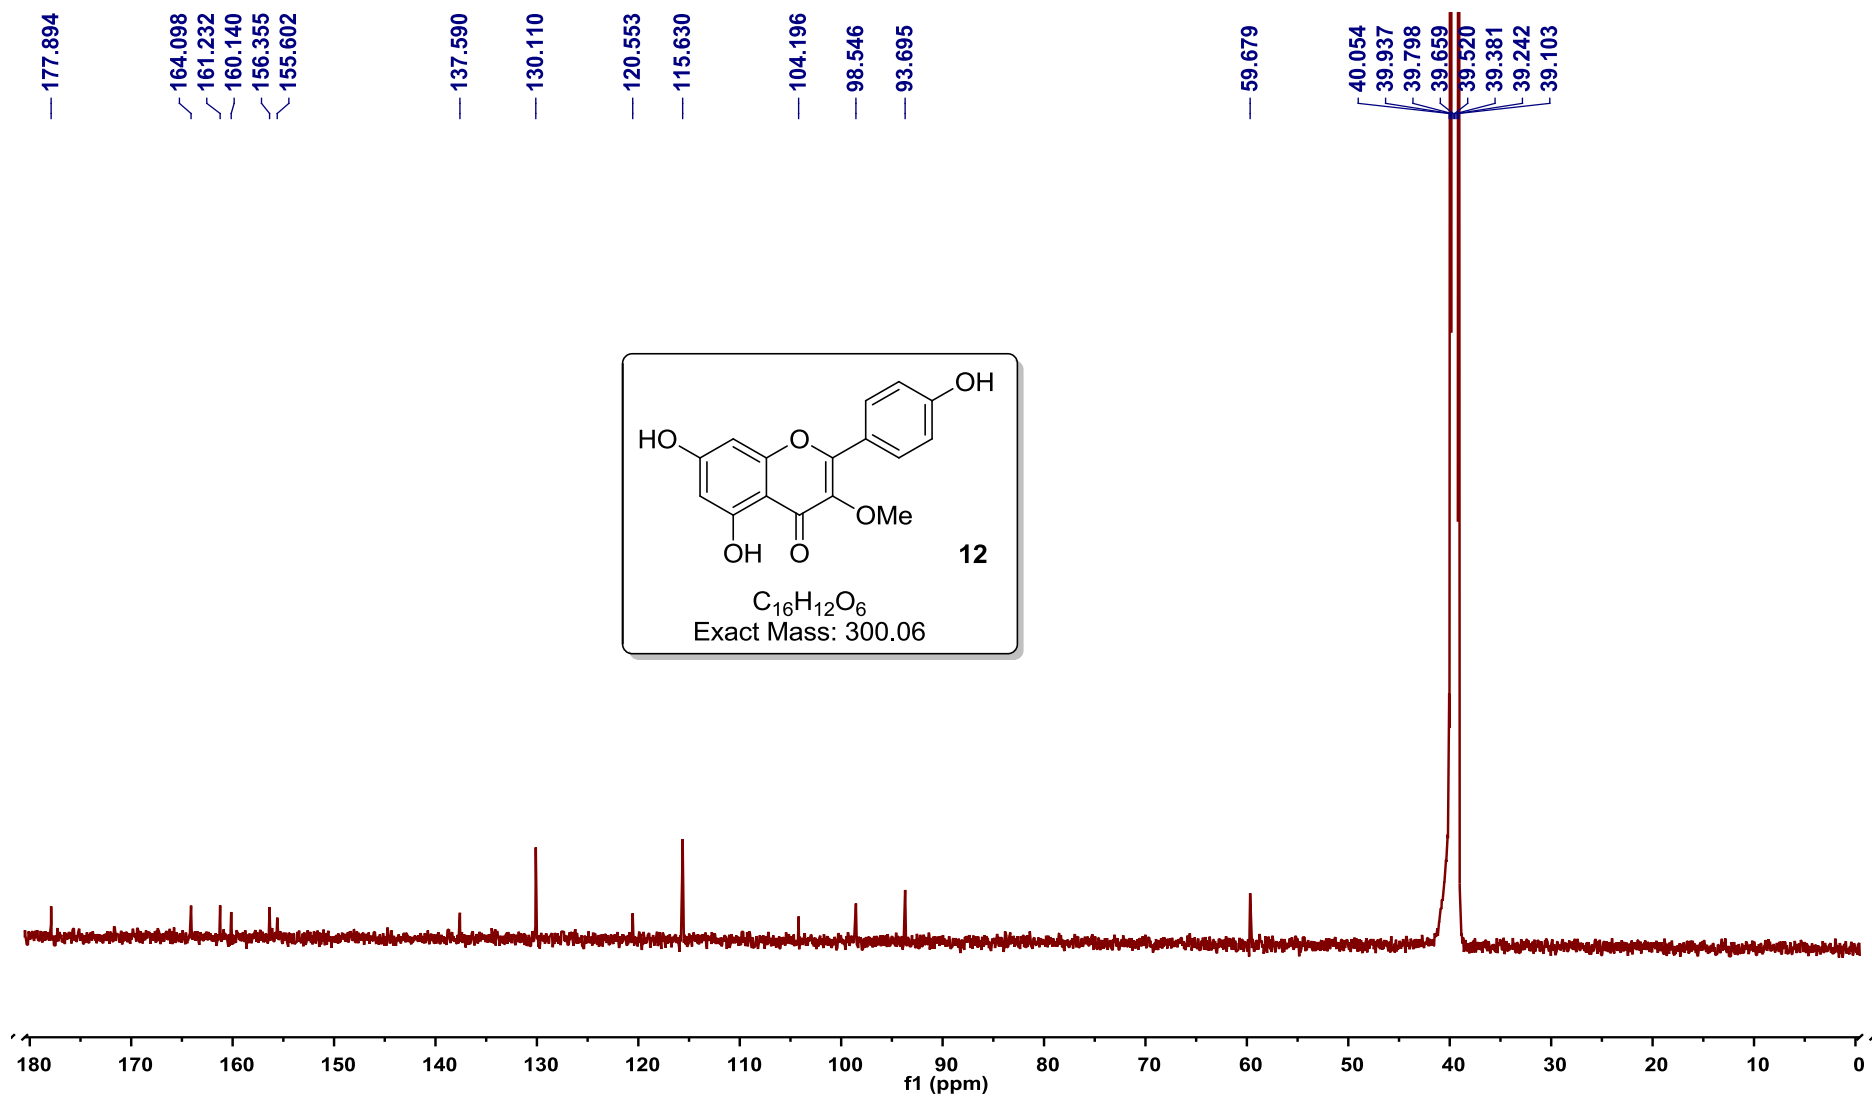



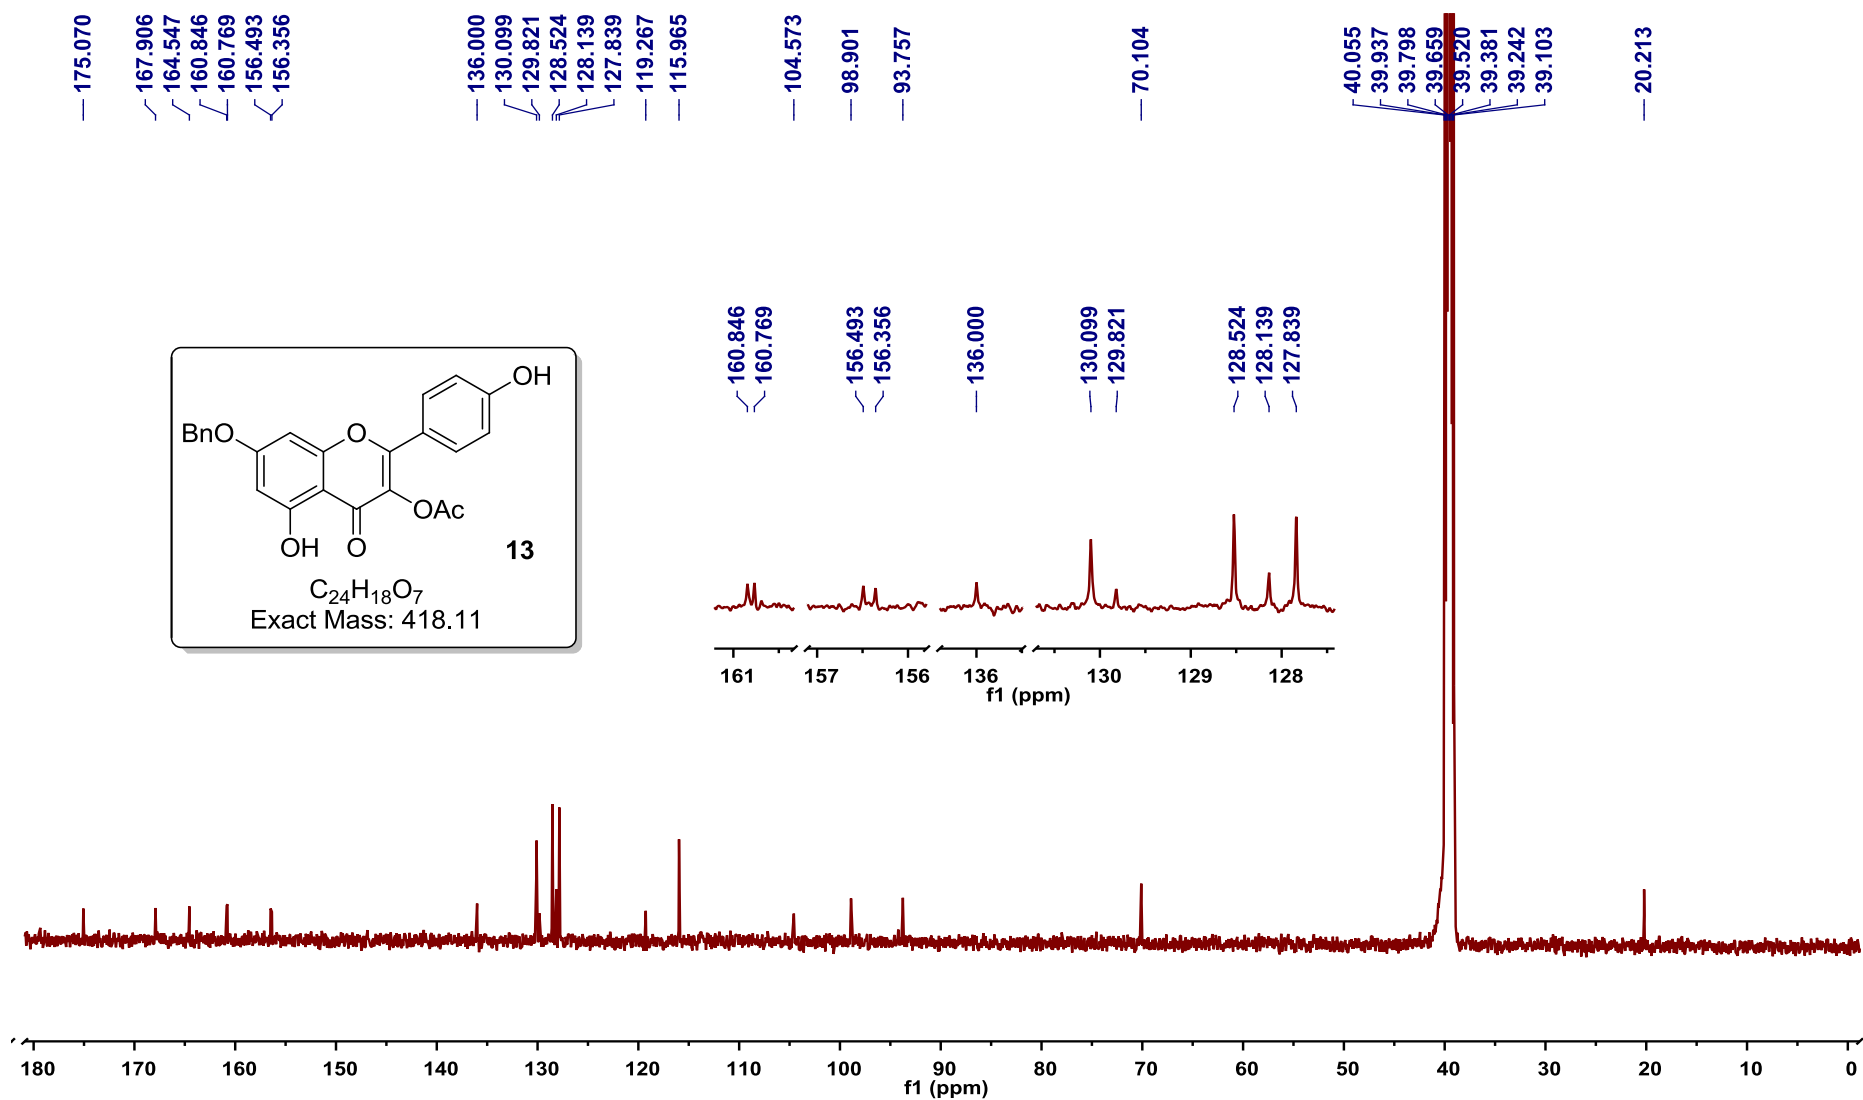

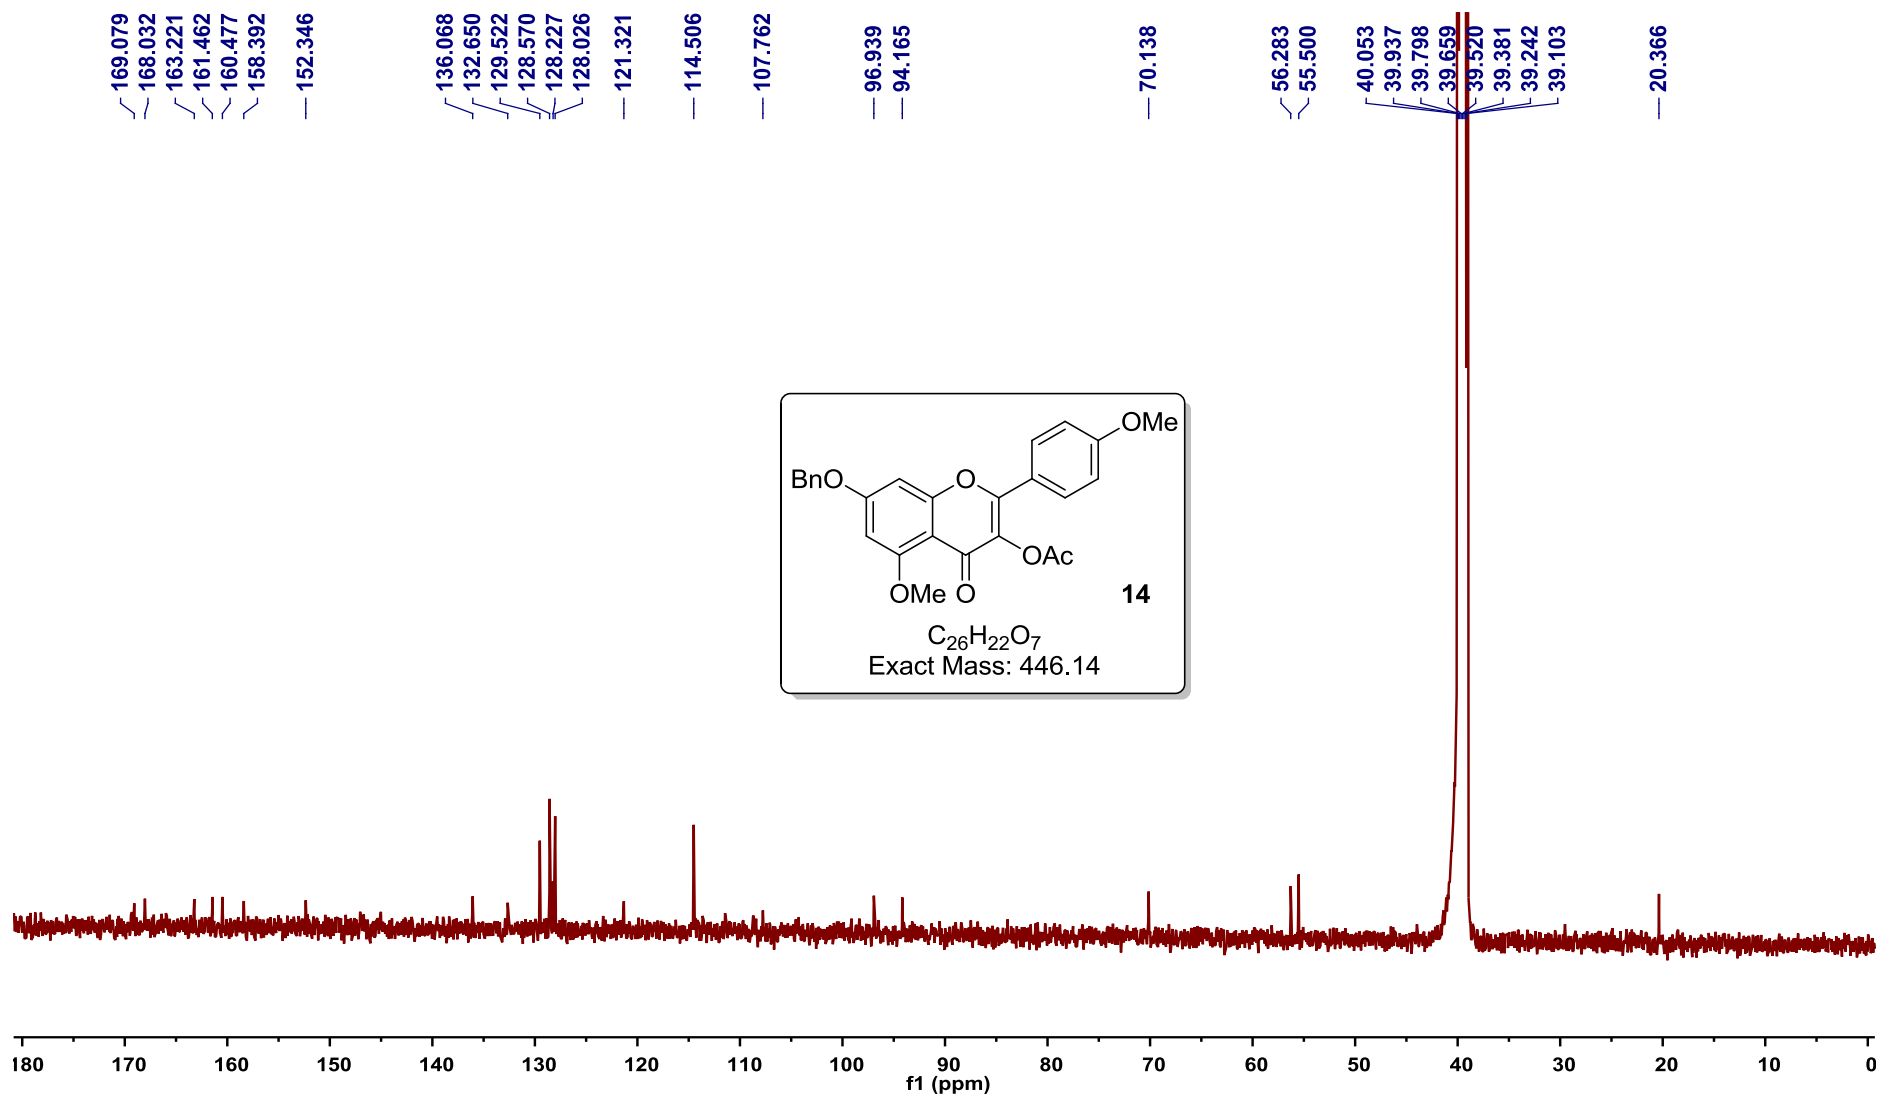

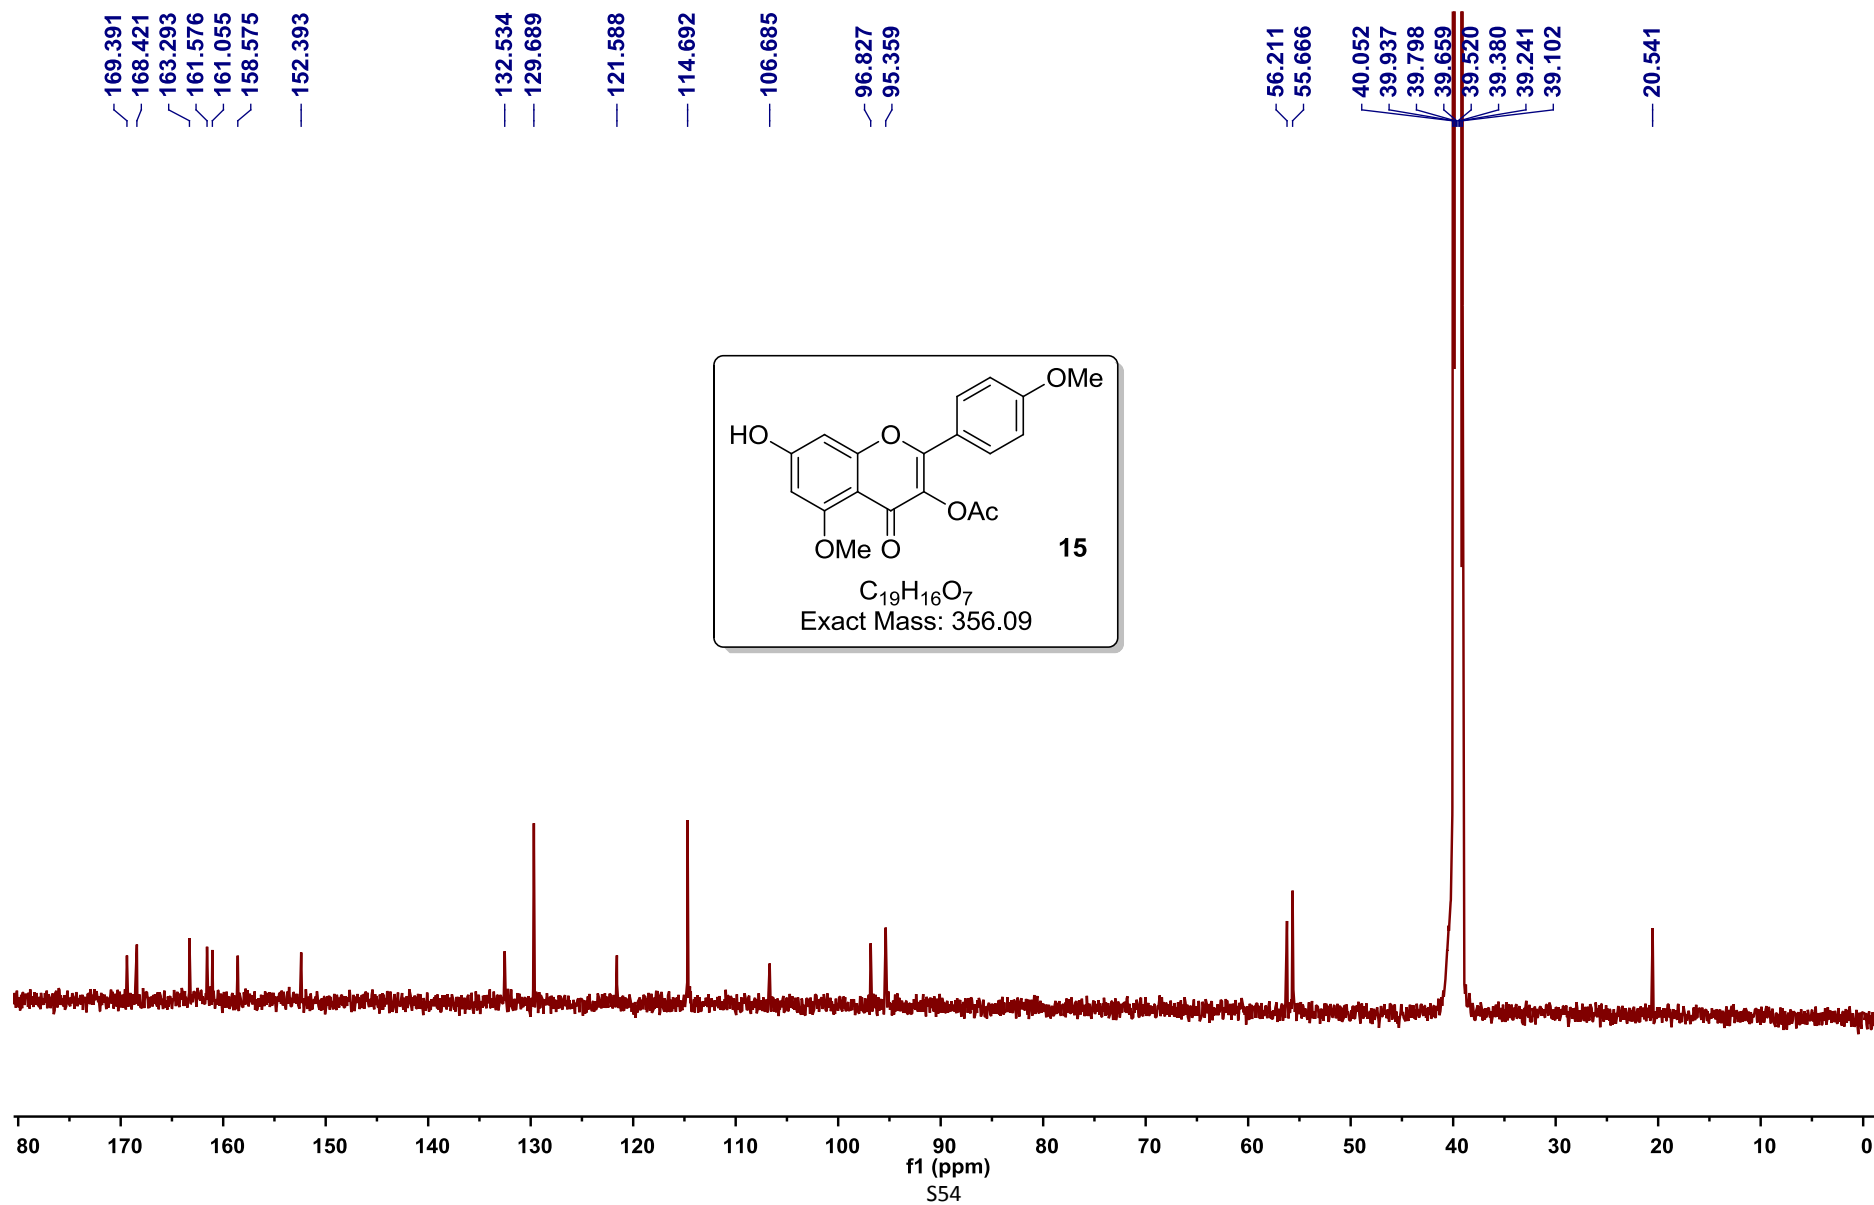

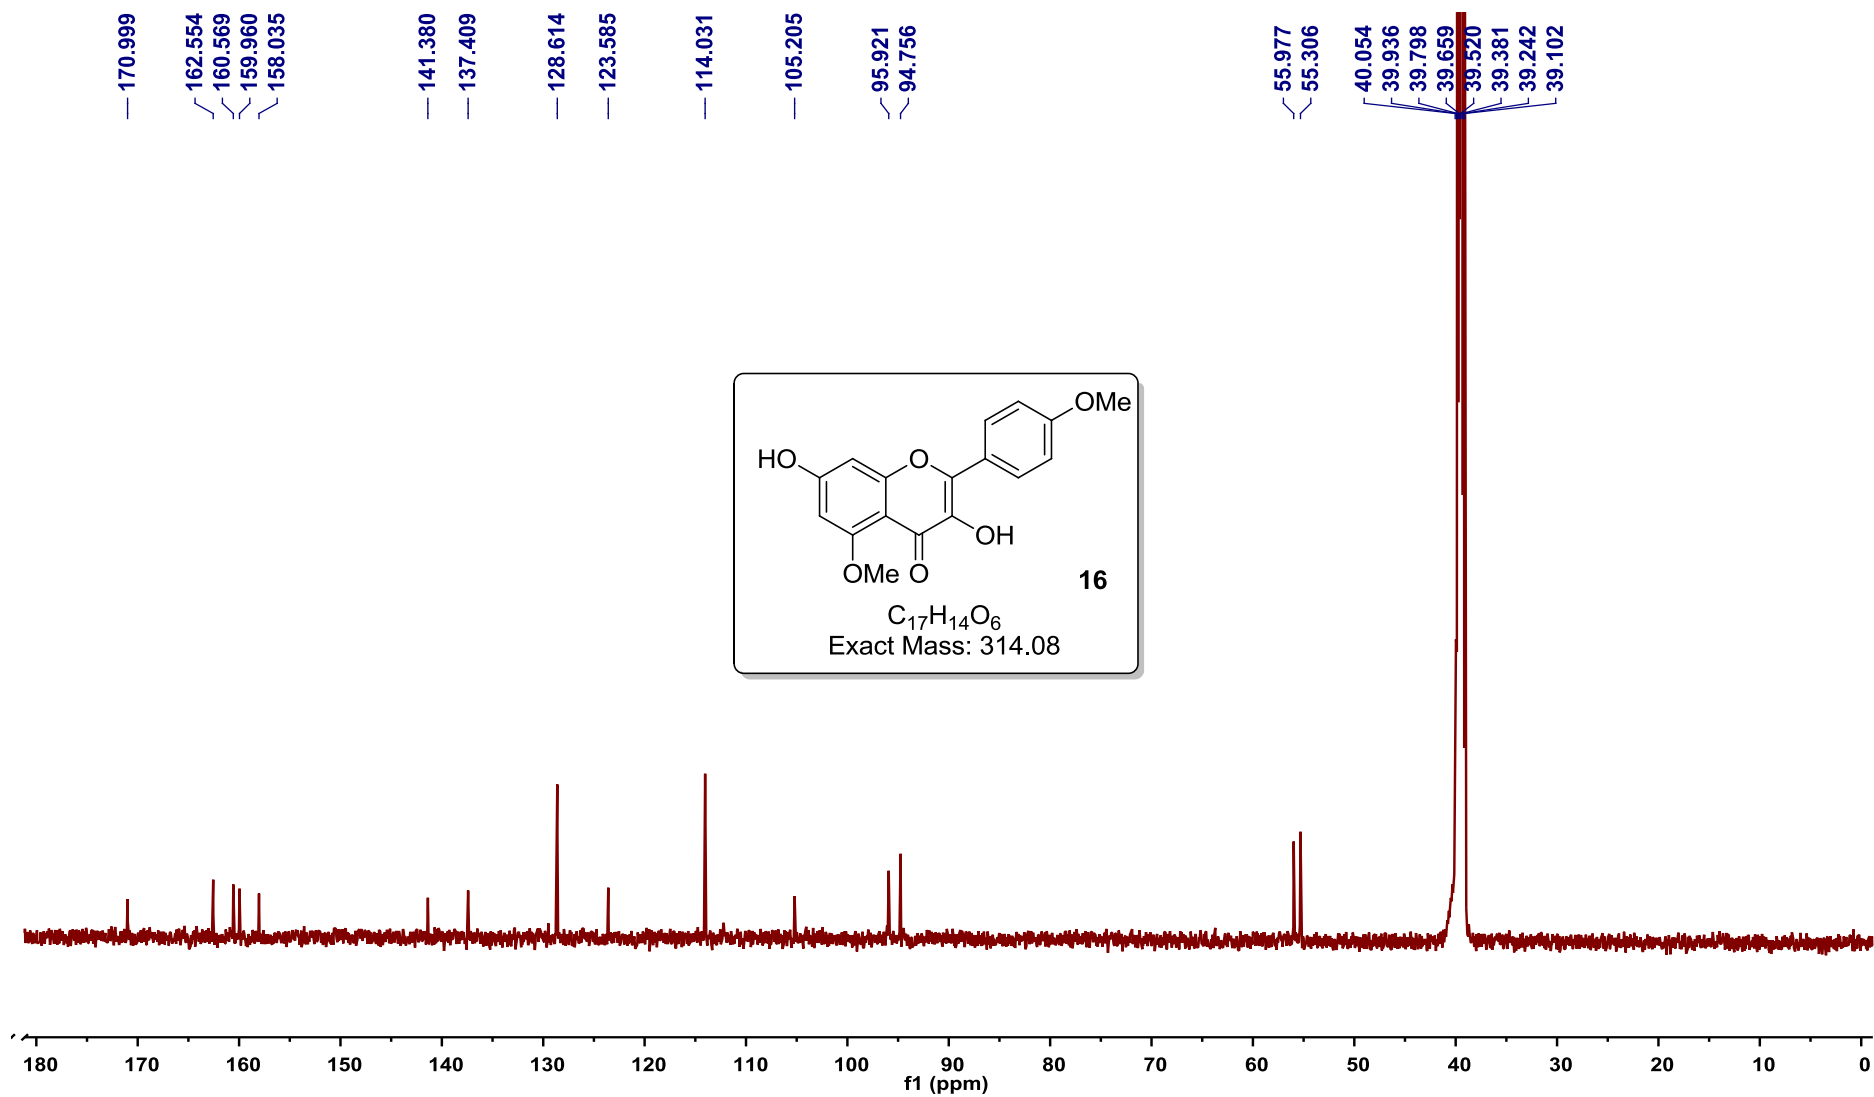

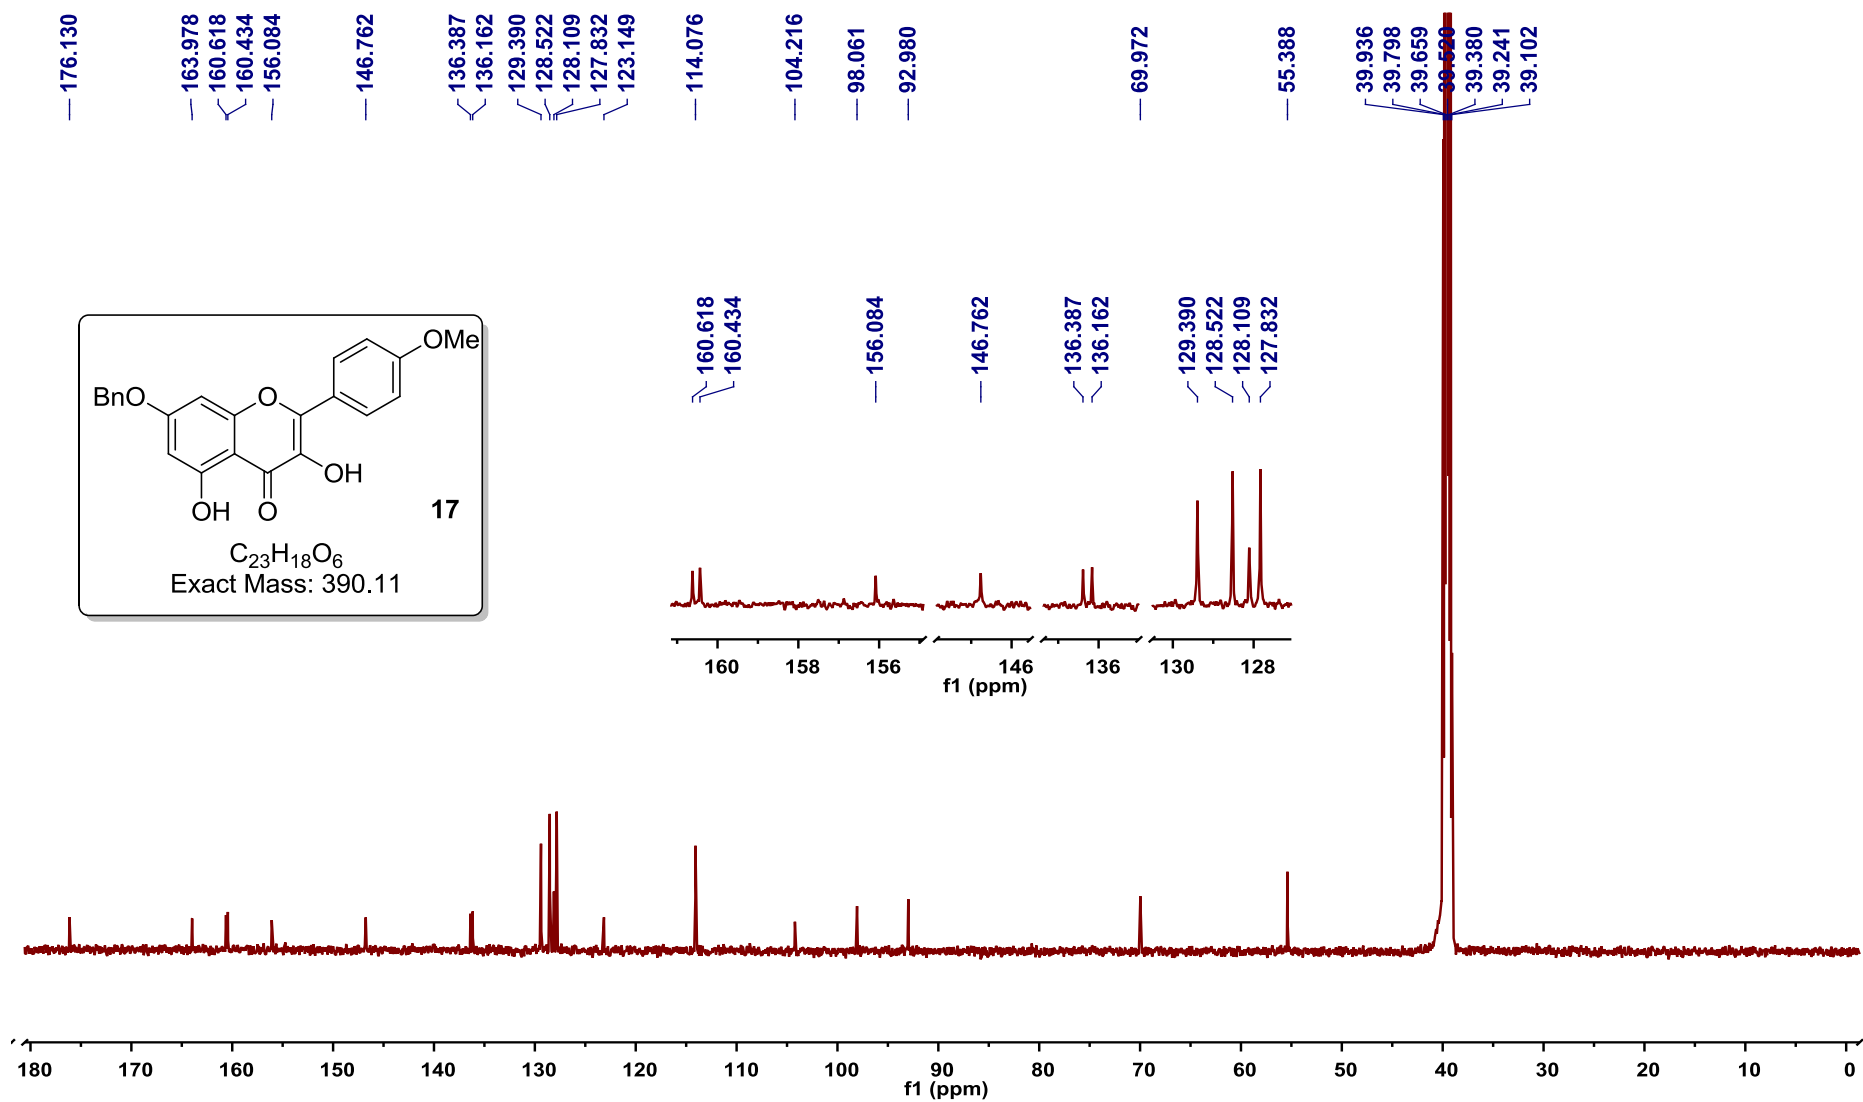

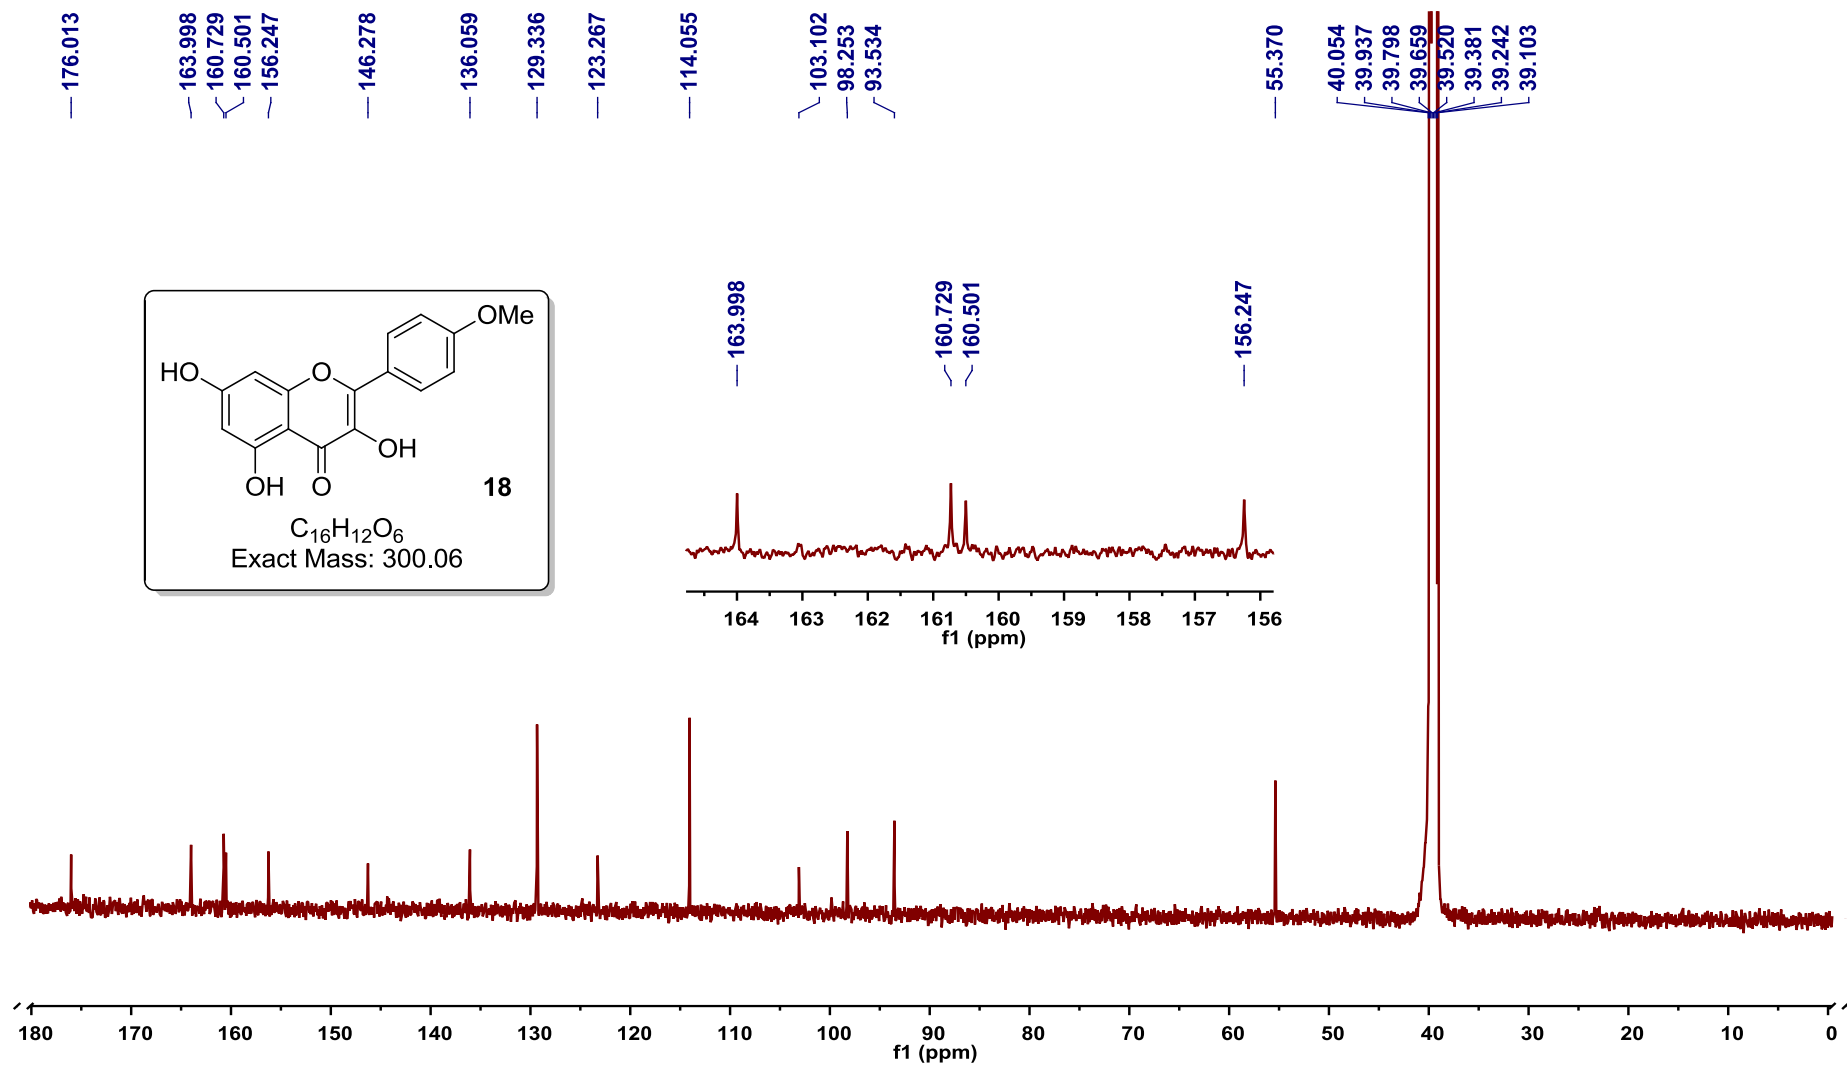

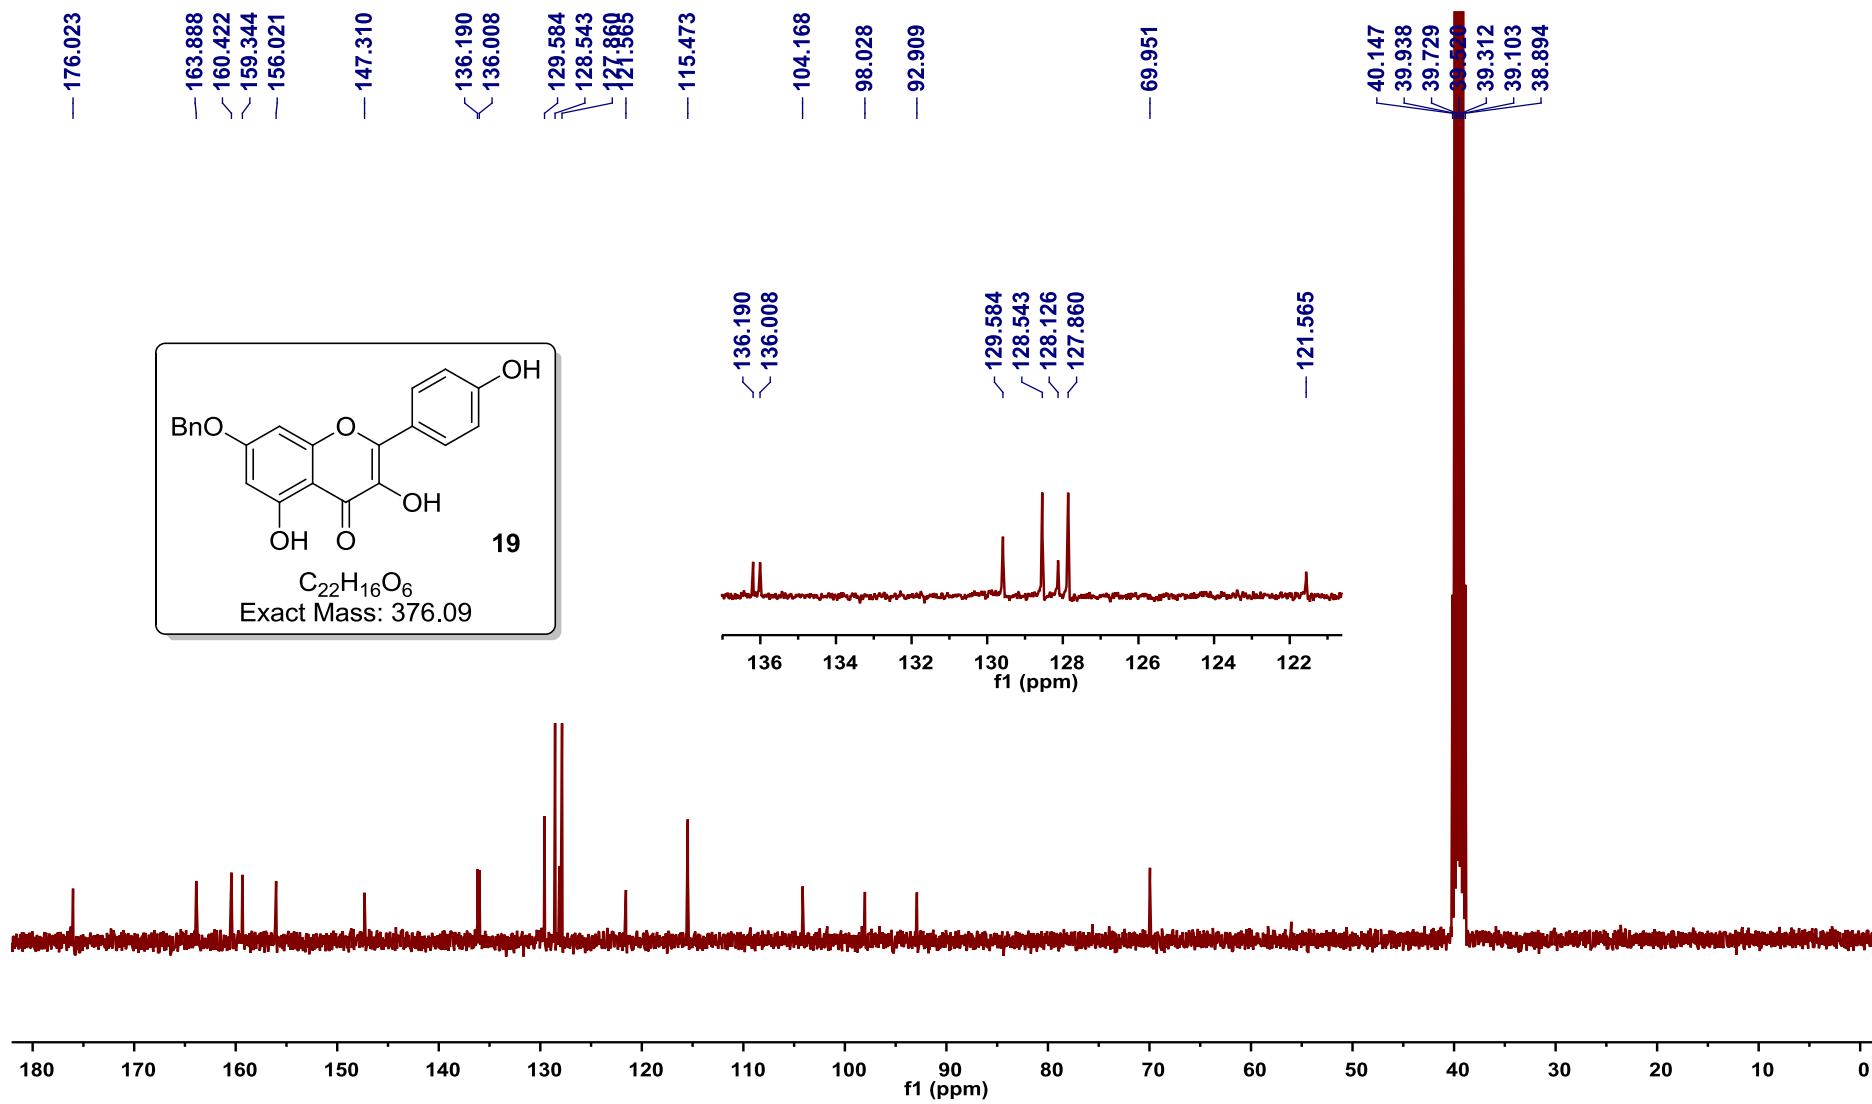

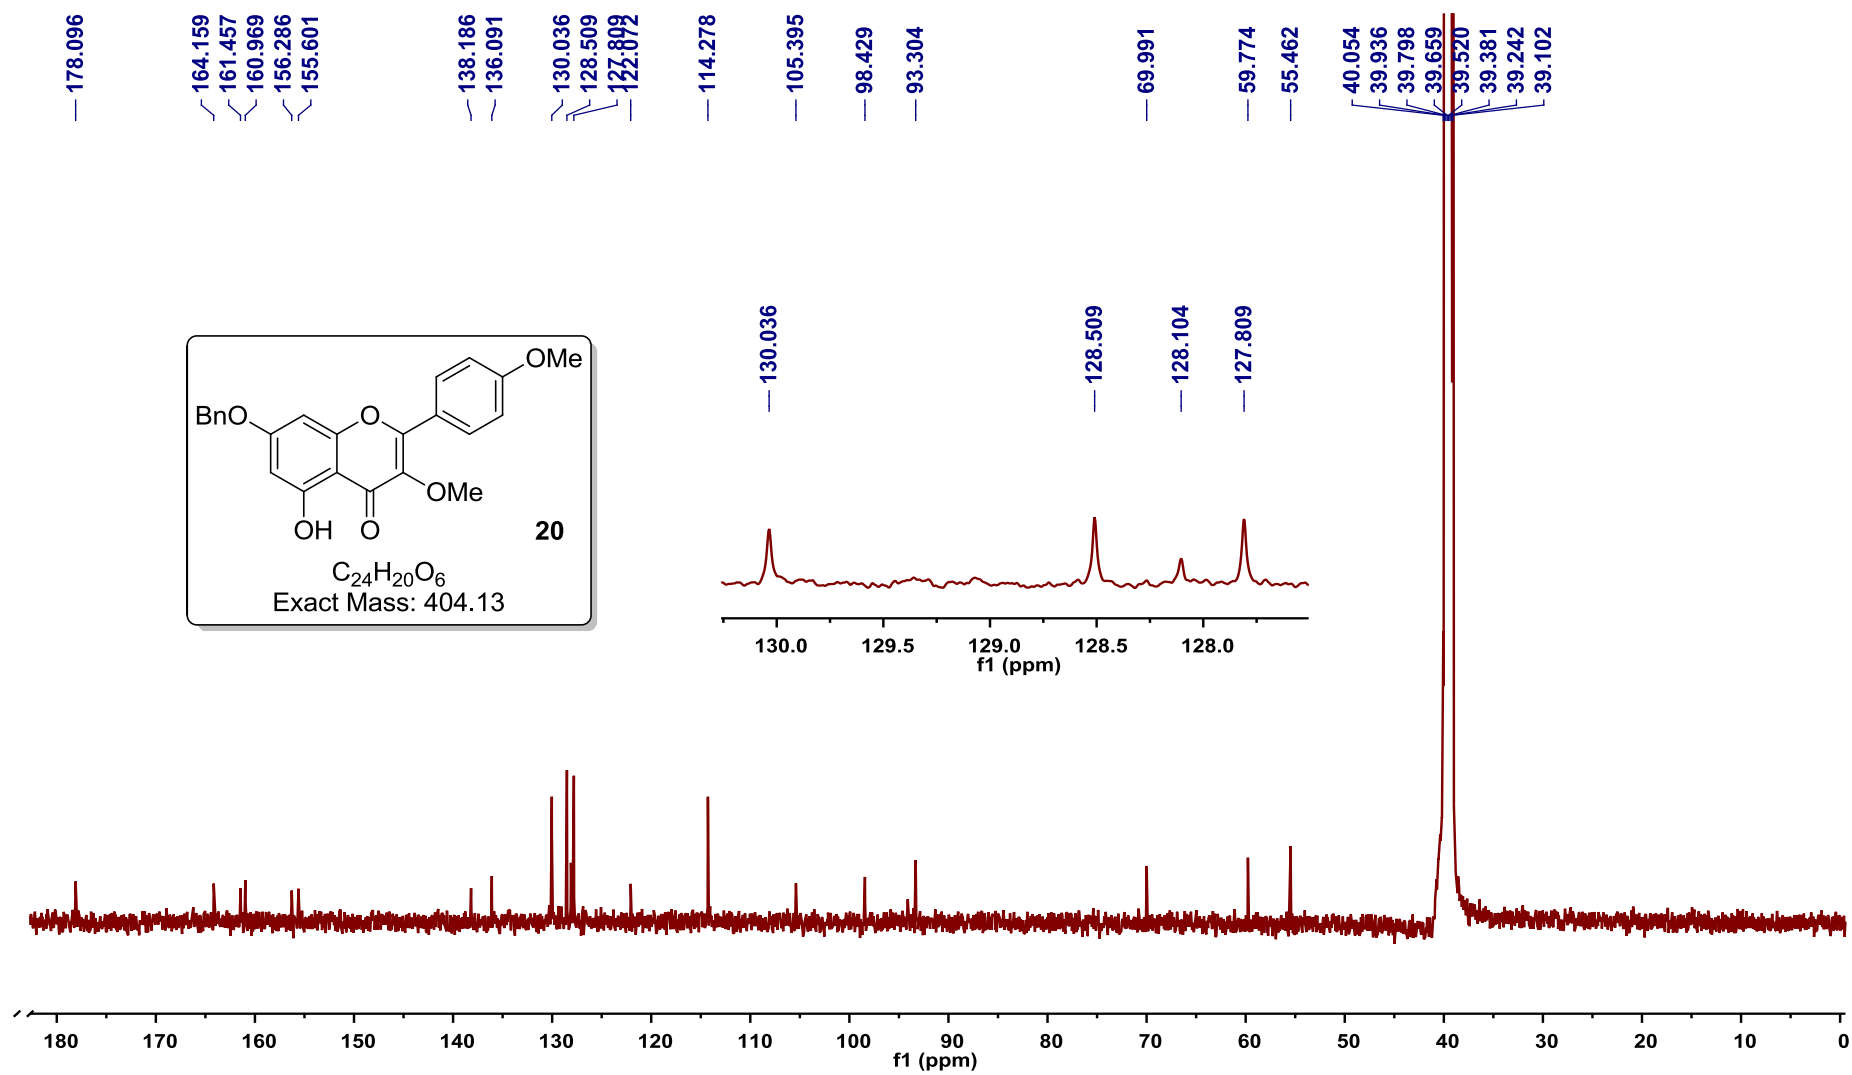



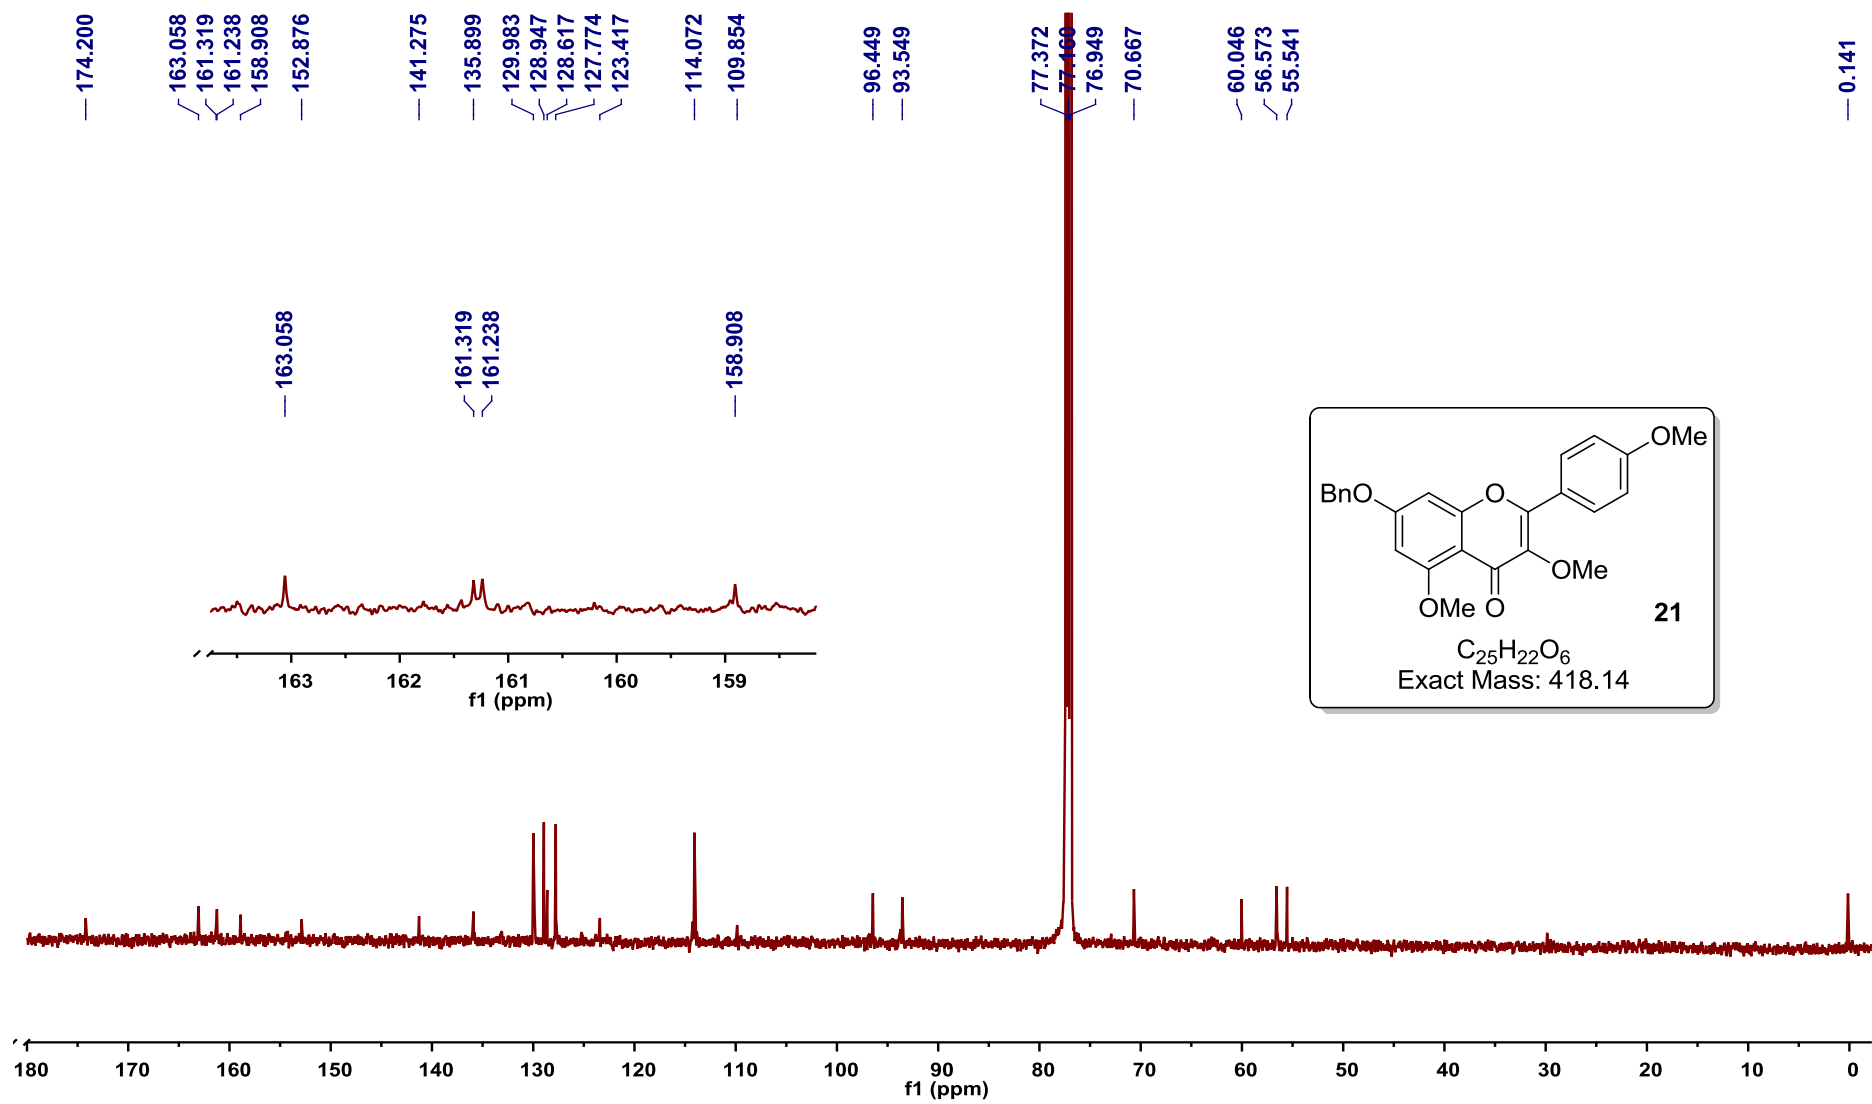

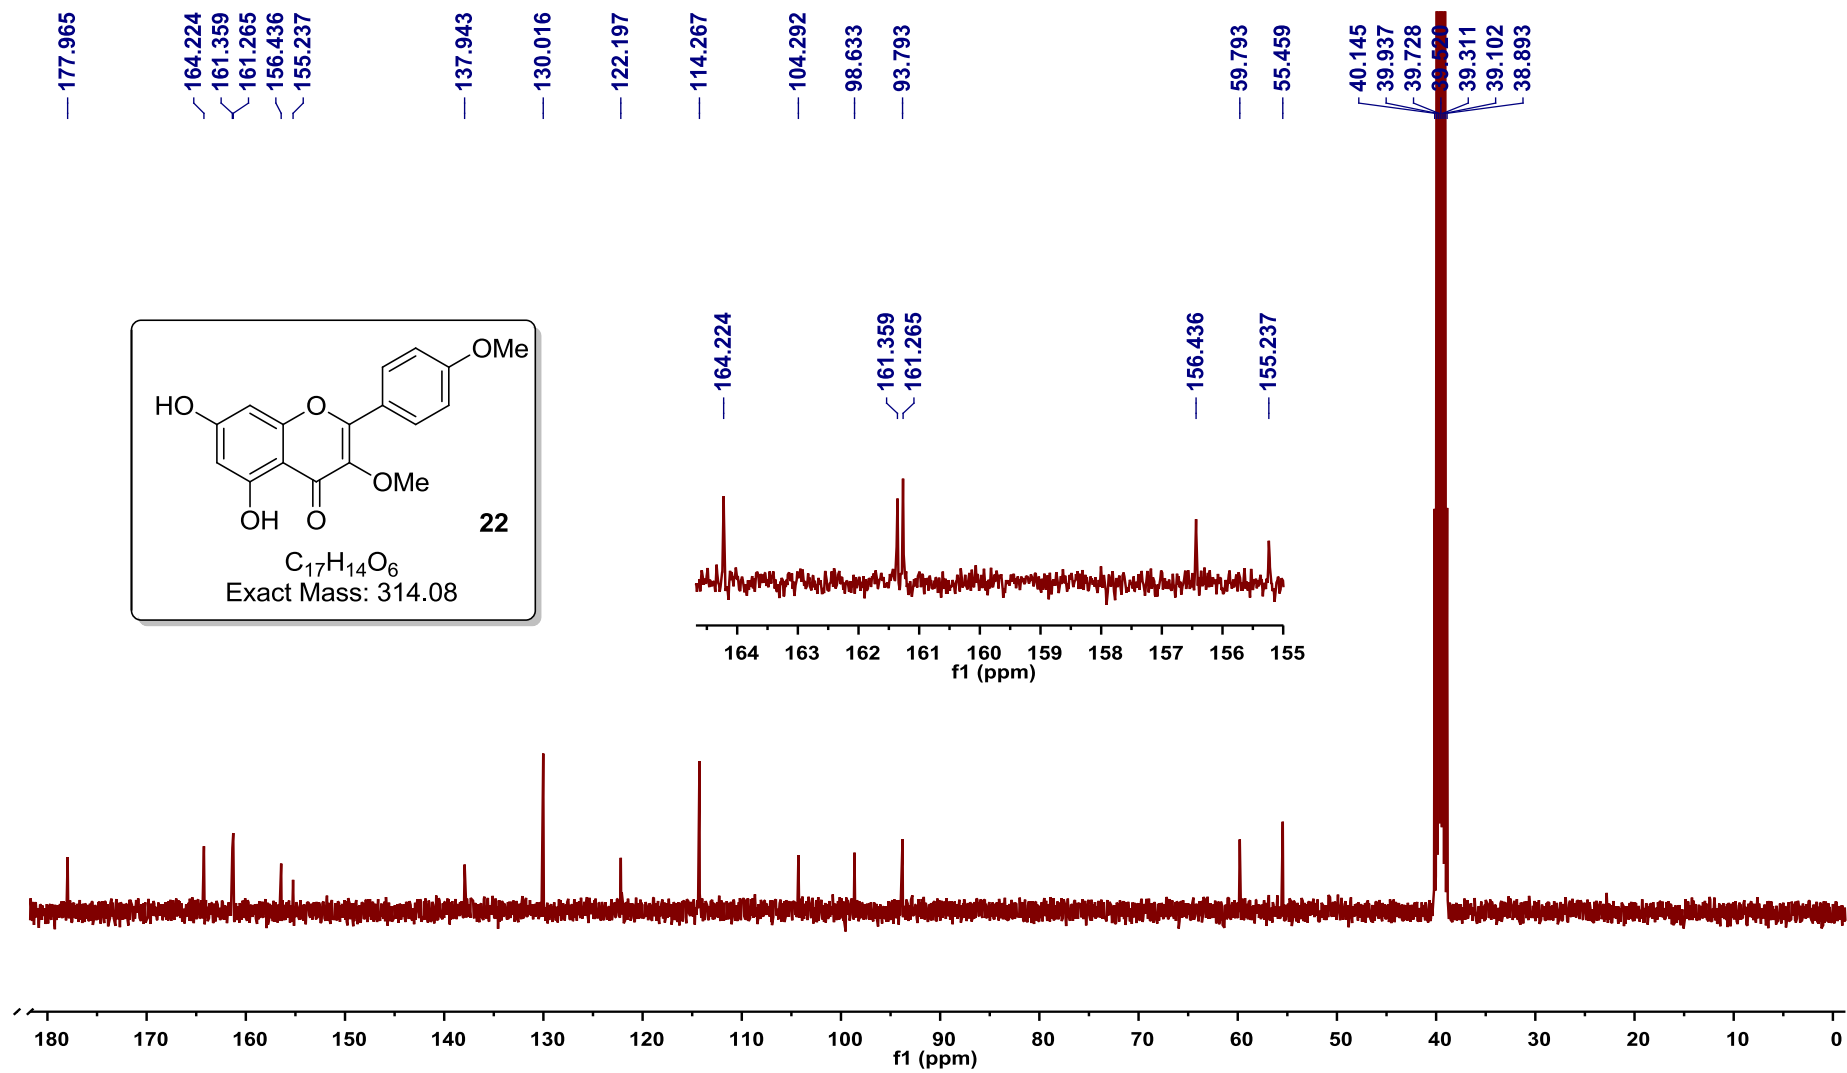

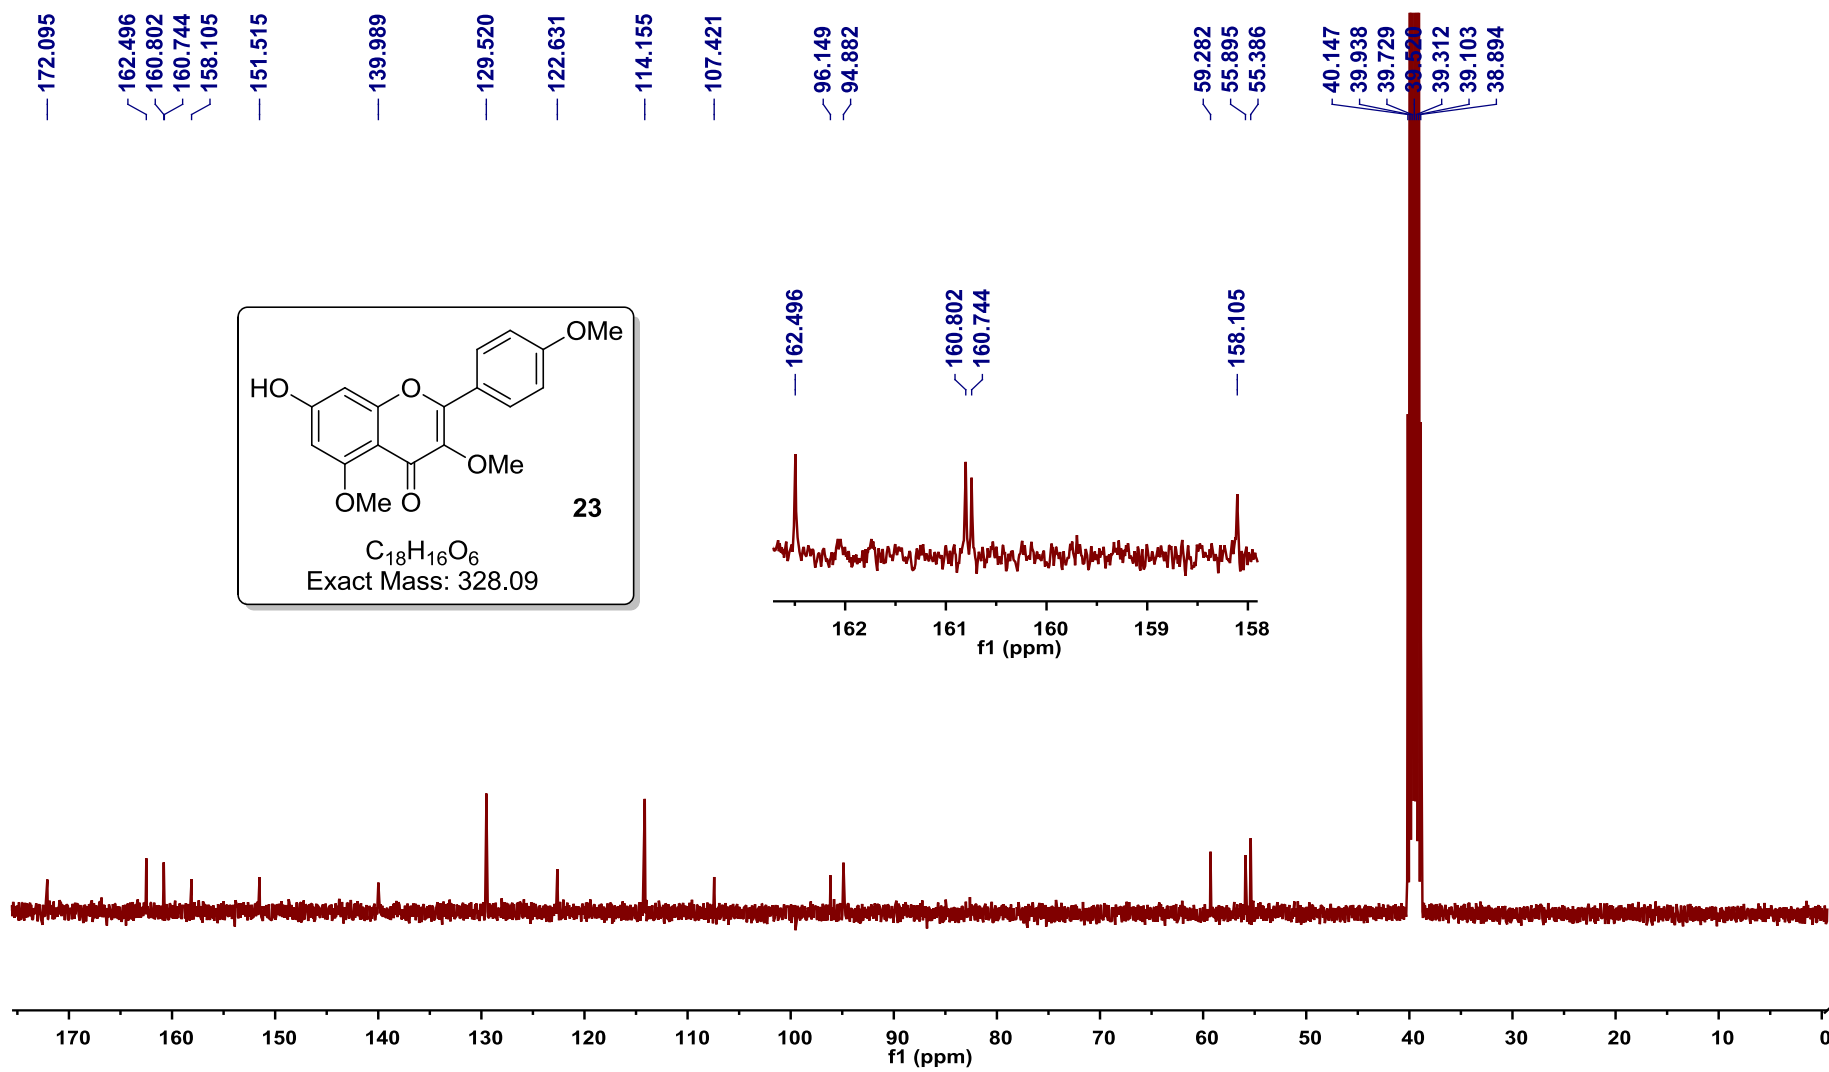

# Mass Spectrum SmartFormula Report

## Analysis Info

Analysis Name D:\Data\USER-2013\MEI-454-1.d  
 Method WU\_tune\_low\_20121222.m  
 Sample Name MEI-454-1  
 Comment

Acquisition Date 1/15/2013 5:07:00 PM

Operator Ma  
 Instrument / Ser# micrOTOF-Q II 10203

## Acquisition Parameter

|             |          |                       |           |                  |           |
|-------------|----------|-----------------------|-----------|------------------|-----------|
| Source Type | ESI      | Ion Polarity          | Positive  | Set Nebulizer    | 0.3 Bar   |
| Focus       | Active   | Set Capillary         | 4500 V    | Set Dry Heater   | 180 °C    |
| Scan Begin  | 50 m/z   | Set End Plate Offset  | -500 V    | Set Dry Gas      | 4.0 l/min |
| Scan End    | 3000 m/z | Set Collision Cell RF | 150.0 Vpp | Set Divert Valve | Source    |

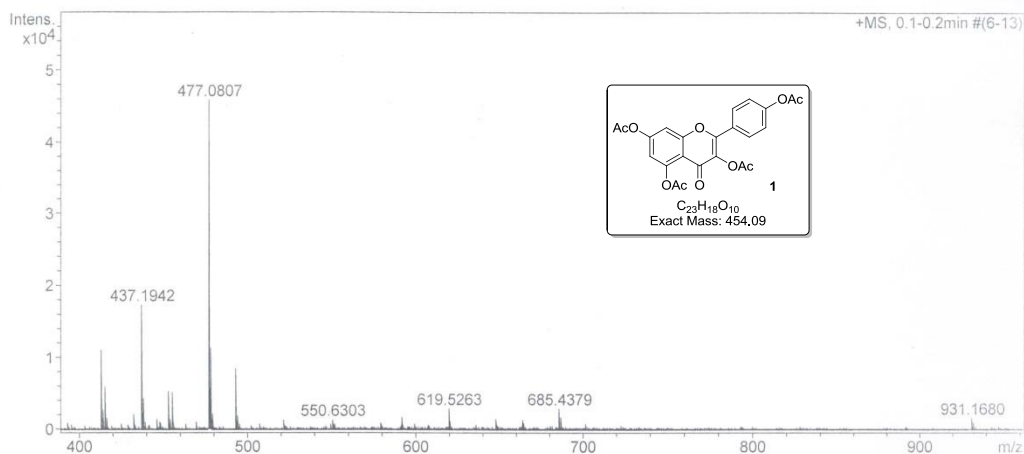

| Meas.<br>m/z | # | Formula                                           | Score  | m/z      | err<br>[ppm] | Mea<br>n err<br>[ppm] | mSi<br>gm<br>a | rdb  | e <sup>-</sup><br>Conf | N-<br>Rul<br>e |
|--------------|---|---------------------------------------------------|--------|----------|--------------|-----------------------|----------------|------|------------------------|----------------|
| 477.0807     | 1 | C <sub>23</sub> H <sub>18</sub> NaO <sub>10</sub> | 100.00 | 477.0792 | -3.2         | -3.1                  | 3.5            | 14.5 | even                   | ok             |

# Mass Spectrum SmartFormula Report

## Analysis Info

Analysis Name D:\Data\USER-2014\MEI412+.d  
Method WU\_tune\_low\_20121222.m  
Sample Name MEI412+  
Comment

Acquisition Date 3/19/2014 3:14:49 PM

Operator Ma  
Instrument / Ser# micrOTOF-Q II 10203

## Acquisition Parameter

|             |            |                       |           |                  |           |
|-------------|------------|-----------------------|-----------|------------------|-----------|
| Source Type | ESI        | Ion Polarity          | Positive  | Set Nebulizer    | 0.4 Bar   |
| Focus       | Not active | Set Capillary         | 4500 V    | Set Dry Heater   | 180 °C    |
| Scan Begin  | 50 m/z     | Set End Plate Offset  | -500 V    | Set Dry Gas      | 3.0 l/min |
| Scan End    | 3000 m/z   | Set Collision Cell RF | 150.0 Vpp | Set Divert Valve | Source    |

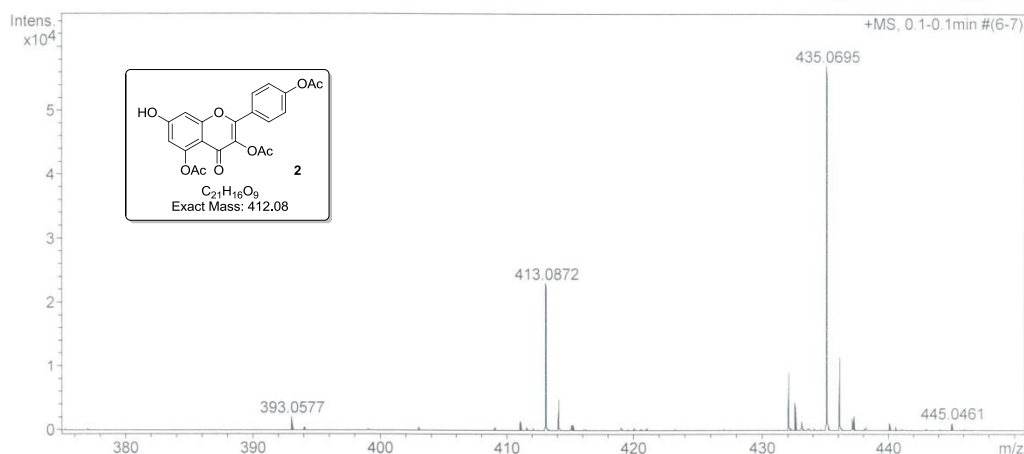

| Meas.<br>m/z | # | Formula                                                       | Score  | m/z      | err<br>[ppm] | Mean<br>err<br>[ppm] | mSig<br>ma | rdb  | e <sup>-</sup><br>Conf | N-<br>Rule |
|--------------|---|---------------------------------------------------------------|--------|----------|--------------|----------------------|------------|------|------------------------|------------|
| 413.0872     | 1 | C <sub>21</sub> H <sub>17</sub> O <sub>9</sub>                | 100.00 | 413.0867 | -1.3         | -0.6                 | 9.5        | 13.5 | even                   | ok         |
| 413.0884     | 1 | C <sub>22</sub> H <sub>13</sub> N <sub>4</sub> O <sub>5</sub> |        | 413.0880 | -0.9         |                      | n.a.       | 18.5 | even                   | ok         |
| 435.0695     | 1 | C <sub>21</sub> H <sub>16</sub> NaO <sub>9</sub>              | 100.00 | 435.0687 | -2.0         | -1.3                 | 14.9       | 13.5 | even                   | ok         |

## Mass Spectrum SmartFormula Report

### Analysis Info

Analysis Name D:\Data\USER-2014\mei83008.d  
 Method WU\_tune\_low\_20121222.m  
 Sample Name mei83008  
 Comment

Acquisition Date 9/18/2014 10:25:37 AM

Operator Ma  
 Instrument / Ser# micrOTOF-Q II 10203

### Acquisition Parameter

|             |            |                       |           |                  |           |
|-------------|------------|-----------------------|-----------|------------------|-----------|
| Source Type | ESI        | Ion Polarity          | Positive  | Set Nebulizer    | 0.4 Bar   |
| Focus       | Not active | Set Capillary         | 4500 V    | Set Dry Heater   | 180 °C    |
| Scan Begin  | 30 m/z     | Set End Plate Offset  | -500 V    | Set Dry Gas      | 3.0 l/min |
| Scan End    | 3000 m/z   | Set Collision Cell RF | 150.0 Vpp | Set Divert Valve | Source    |

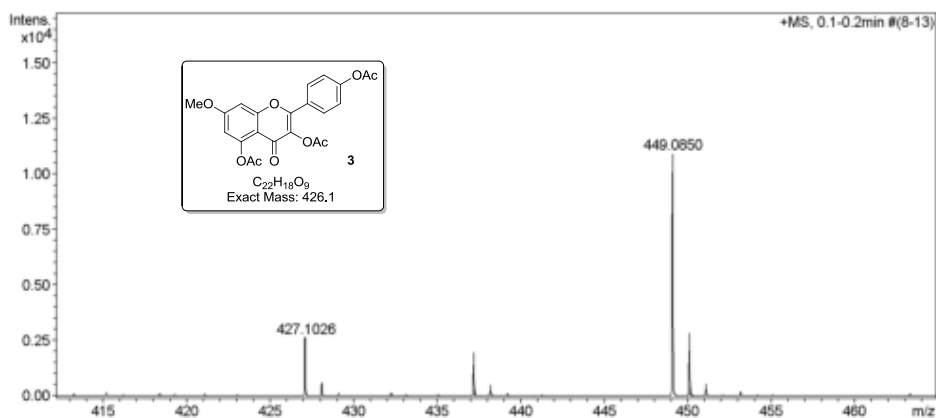

| Meas. m/z | # | Formula          | Score  | m/z      | err [ppm] | Mean err [ppm] | mSig ma | rdb  | e <sup>-</sup> Conf | N-Rule |
|-----------|---|------------------|--------|----------|-----------|----------------|---------|------|---------------------|--------|
| 427.1026  | 1 | C 22 H 19 O 9    | 100.00 | 427.1024 | -0.5      | -1.0           | 5.8     | 13.5 | even                | ok     |
| 449.0850  | 1 | C 22 H 18 Na O 9 | 100.00 | 449.0843 | -1.6      | -1.3           | 11.0    | 13.5 | even                | ok     |

## Mass Spectrum SmartFormula Report

### Analysis Info

Analysis Name D:\Data\USER-2014\0619.d  
 Method WU\_tune\_low\_20121222.m  
 Sample Name 0619  
 Comment

Acquisition Date 9/27/2014 1:02:53 PM

Operator Ma  
 Instrument / Ser# micrOTOF-Q II 10203

### Acquisition Parameter

|             |            |                       |           |                  |           |
|-------------|------------|-----------------------|-----------|------------------|-----------|
| Source Type | ESI        | Ion Polarity          | Negative  | Set Nebulizer    | 0.4 Bar   |
| Focus       | Not active | Set Capillary         | 4000 V    | Set Dry Heater   | 180 °C    |
| Scan Begin  | 30 m/z     | Set End Plate Offset  | -500 V    | Set Dry Gas      | 3.0 l/min |
| Scan End    | 3000 m/z   | Set Collision Cell RF | 150.0 Vpp | Set Divert Valve | Source    |

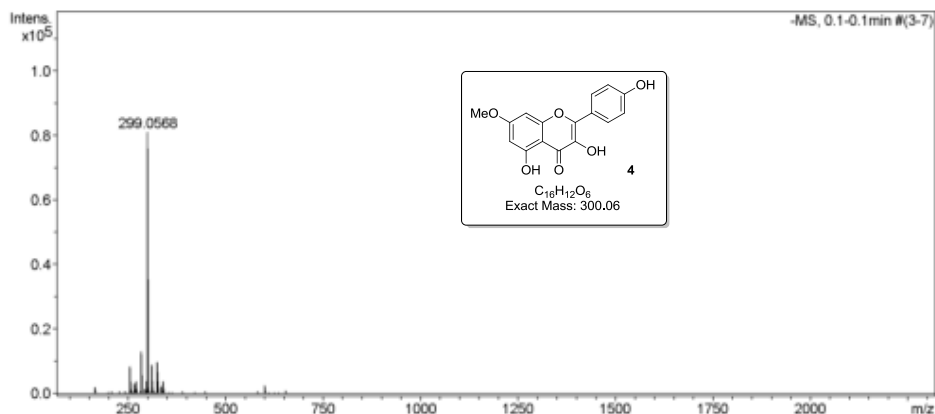

| Meas. m/z | # | Formula                                        | Score  | m/z      | err<br>[ppm] | Mean<br>err<br>[ppm] | mSi<br>gma | rdB  | e <sup>-</sup><br>Conf | N-R<br>ule |
|-----------|---|------------------------------------------------|--------|----------|--------------|----------------------|------------|------|------------------------|------------|
| 299.0568  | 1 | C <sub>16</sub> H <sub>11</sub> O <sub>6</sub> | 100.00 | 299.0561 | -2.3         | -2.0                 | 3.4        | 11.5 | even                   | ok         |

# Mass Spectrum SmartFormula Report

## Analysis Info

Analysis Name D:\Data\USER-2014\MEI314-2.d  
 Method WU\_tune\_low\_20121222.m  
 Sample Name MEI314-2  
 Comment

Acquisition Date 3/26/2014 2:54:50 PM

Operator Ma  
 Instrument / Ser# micrOTOF-Q II 10203

## Acquisition Parameter

|             |            |                       |           |                  |           |
|-------------|------------|-----------------------|-----------|------------------|-----------|
| Source Type | ESI        | Ion Polarity          | Positive  | Set Nebulizer    | 0.4 Bar   |
| Focus       | Not active | Set Capillary         | 4500 V    | Set Dry Heater   | 180 °C    |
| Scan Begin  | 50 m/z     | Set End Plate Offset  | -500 V    | Set Dry Gas      | 3.0 l/min |
| Scan End    | 3000 m/z   | Set Collision Cell RF | 150.0 Vpp | Set Divert Valve | Source    |

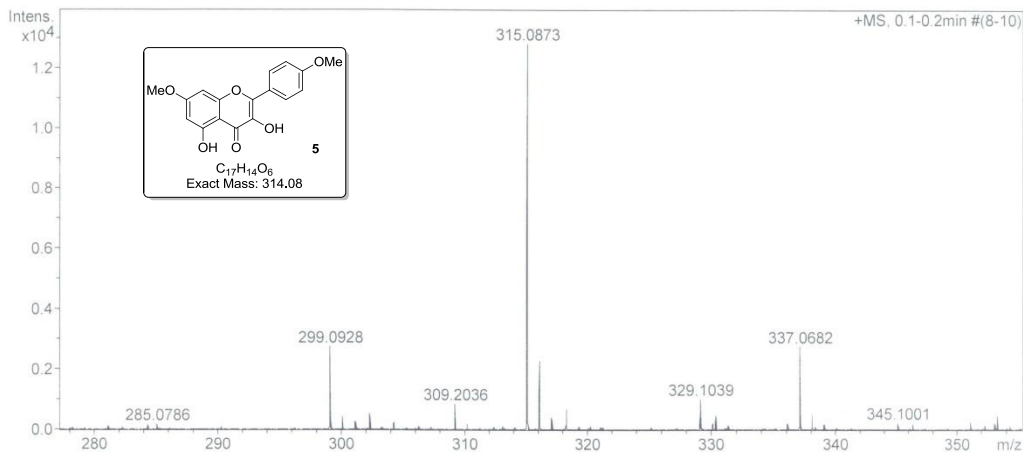

| Meas. m/z | # | Formula                                          | Score  | m/z      | err [ppm] | Mean err [ppm] | mSigma | rdb  | e <sup>-</sup> Conf | N-Rule |
|-----------|---|--------------------------------------------------|--------|----------|-----------|----------------|--------|------|---------------------|--------|
| 315.0873  | 1 | C <sub>17</sub> H <sub>15</sub> O <sub>6</sub>   | 100.00 | 315.0863 | -3.0      | -2.9           | 3.4    | 10.5 | even                | ok     |
| 337.0682  | 1 | C <sub>17</sub> H <sub>14</sub> NaO <sub>6</sub> | 100.00 | 337.0683 | 0.1       | 2.9            | 18.4   | 10.5 | even                | ok     |



## Mass Spectrum SmartFormula Report

### Analysis Info

Analysis Name D:\Data\USER-2014\mei328.d  
 Method WU\_tune\_low\_20121222.m  
 Sample Name mei328  
 Comment

Acquisition Date 4/23/2014 4:51:34 PM

Operator Ma  
 Instrument / Ser# micrOTOF-Q II 10203

### Acquisition Parameter

|             |            |                       |           |                  |           |
|-------------|------------|-----------------------|-----------|------------------|-----------|
| Source Type | ESI        | Ion Polarity          | Negative  | Set Nebulizer    | 0.4 Bar   |
| Focus       | Not active | Set Capillary         | 4000 V    | Set Dry Heater   | 180 °C    |
| Scan Begin  | 50 m/z     | Set End Plate Offset  | -500 V    | Set Dry Gas      | 3.0 l/min |
| Scan End    | 3000 m/z   | Set Collision Cell RF | 150.0 Vpp | Set Divert Valve | Source    |

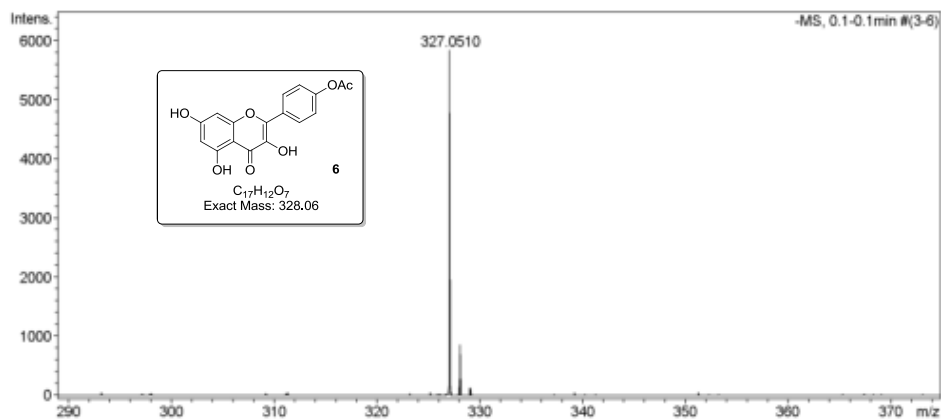

| Meas. m/z | # | Formula       | Score  | m/z      | err<br>[ppm] | Mean<br>err<br>[ppm] | mSig<br>ma | rdb  | e <sup>-</sup><br>Conf | N-R<br>ule |
|-----------|---|---------------|--------|----------|--------------|----------------------|------------|------|------------------------|------------|
| 327.0510  | 1 | C 17 H 11 O 7 | 100.00 | 327.0510 | 0.1          | 0.1                  | 21.8       | 12.5 | even                   | ok         |

## Mass Spectrum SmartFormula Report

### Analysis Info

Analysis Name D:\Data\USER-2014\mei0606.d  
 Method WU\_tune\_low\_20121222.m  
 Sample Name mei0606  
 Comment

Acquisition Date 9/17/2014 2:53:23 PM

Operator Ma  
 Instrument / Ser# micrOTOF-Q II 10203

### Acquisition Parameter

|             |            |                       |           |                  |           |
|-------------|------------|-----------------------|-----------|------------------|-----------|
| Source Type | ESI        | Ion Polarity          | Positive  | Set Nebulizer    | 0.4 Bar   |
| Focus       | Not active | Set Capillary         | 4500 V    | Set Dry Heater   | 180 °C    |
| Scan Begin  | 30 m/z     | Set End Plate Offset  | -500 V    | Set Dry Gas      | 3.0 l/min |
| Scan End    | 3000 m/z   | Set Collision Cell RF | 150.0 Vpp | Set Divert Valve | Source    |

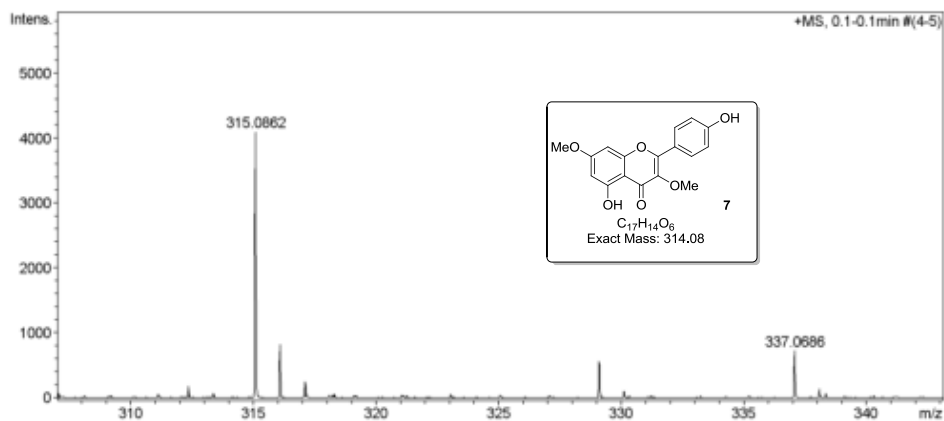

| Meas.<br>m/z | # | Formula          | Score  | m/z      | err<br>[ppm] | Mea<br>n err<br>[ppm] | mSig<br>ma | rdb  | e <sup>-</sup><br>Conf | N-<br>Rule |
|--------------|---|------------------|--------|----------|--------------|-----------------------|------------|------|------------------------|------------|
| 315.0862     | 1 | C 17 H 15 O 6    | 100.00 | 315.0863 | 0.4          | -1.2                  | 20.7       | 10.5 | even                   | ok         |
| 337.0686     | 1 | C 17 H 14 Na O 6 | 100.00 | 337.0683 | -1.1         | -2.6                  | 16.4       | 10.5 | even                   | ok         |

# Mass Spectrum SmartFormula Report

## Analysis Info

Analysis Name D:\Data\USER-2013\M502.d  
Method WU\_tune\_low\_20121222.m  
Sample Name M502  
Comment

Acquisition Date 3/11/2013 4:35:28 PM

Operator Ma  
Instrument / Ser# micrOTOF-Q II 10203

## Acquisition Parameter

|             |            |                       |           |                  |           |
|-------------|------------|-----------------------|-----------|------------------|-----------|
| Source Type | ESI        | Ion Polarity          | Positive  | Set Nebulizer    | 0.3 Bar   |
| Focus       | Not active | Set Capillary         | 4500 V    | Set Dry Heater   | 180 °C    |
| Scan Begin  | 50 m/z     | Set End Plate Offset  | -500 V    | Set Dry Gas      | 4.0 l/min |
| Scan End    | 3000 m/z   | Set Collision Cell RF | 150.0 Vpp | Set Divert Valve | Source    |

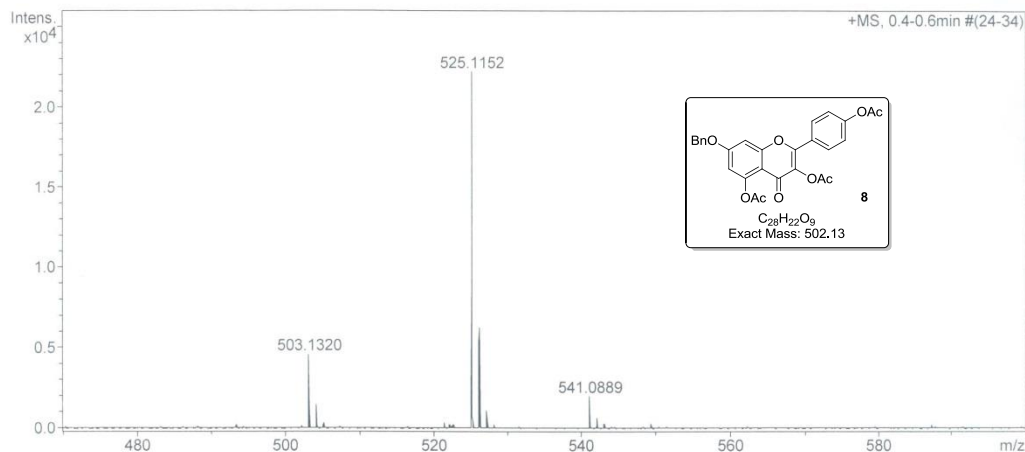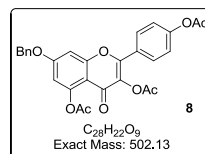

| Meas.<br>m/z | # | Formula                                                         | Score  | m/z      | err<br>[ppm] | Mea<br>n err<br>[ppm] | mSig<br>ma | rdb  | e <sup>-</sup><br>Conf | N-<br>Rule |
|--------------|---|-----------------------------------------------------------------|--------|----------|--------------|-----------------------|------------|------|------------------------|------------|
| 503.1320     | 1 | C <sub>28</sub> H <sub>23</sub> O <sub>9</sub>                  | 51.57  | 503.1337 | 3.3          | 4.8                   | 12.4       | 17.5 | even                   | ok         |
|              | 2 | C <sub>26</sub> H <sub>21</sub> N <sub>3</sub> O <sub>8</sub>   | 100.00 | 503.1323 | 0.6          | 2.1                   | 17.3       | 18.0 | odd                    | ok         |
|              | 3 | C <sub>23</sub> H <sub>23</sub> N <sub>2</sub> O <sub>11</sub>  | 18.55  | 503.1296 | -4.7         | -3.2                  | 33.1       | 13.5 | even                   | ok         |
|              | 4 | C <sub>38</sub> H <sub>17</sub> N <sub>1</sub> O                | 24.51  | 503.1305 | -3.1         | -1.5                  | 45.9       | 31.0 | odd                    | ok         |
| 525.1152     | 1 | C <sub>26</sub> H <sub>20</sub> N <sub>3</sub> NaO <sub>8</sub> | 84.25  | 525.1143 | -1.8         | -1.4                  | 6.7        | 18.0 | odd                    | ok         |
|              | 2 | C <sub>28</sub> H <sub>22</sub> NaO <sub>9</sub>                | 100.00 | 525.1156 | 0.8          | 1.2                   | 12.3       | 17.5 | even                   | ok         |
|              | 3 | C <sub>29</sub> H <sub>18</sub> N <sub>4</sub> NaO <sub>5</sub> | 35.57  | 525.1169 | 3.3          | 3.7                   | 24.3       | 22.5 | even                   | ok         |

# Mass Spectrum SmartFormula Report

## Analysis Info

Analysis Name D:\Data\USER-2014\MEITBTS.d  
 Method WU\_tune\_low\_20121222.m  
 Sample Name MEITBTS  
 Comment

Acquisition Date 4/10/2014 3:25:02 PM

Operator Ma  
 Instrument / Ser# micrOTOF-Q II 10203

## Acquisition Parameter

|             |            |                       |           |                  |           |
|-------------|------------|-----------------------|-----------|------------------|-----------|
| Source Type | ESI        | Ion Polarity          | Positive  | Set Nebulizer    | 0.3 Bar   |
| Focus       | Not active | Set Capillary         | 4500 V    | Set Dry Heater   | 180 °C    |
| Scan Begin  | 50 m/z     | Set End Plate Offset  | -500 V    | Set Dry Gas      | 3.0 l/min |
| Scan End    | 3000 m/z   | Set Collision Cell RF | 150.0 Vpp | Set Divert Valve | Source    |

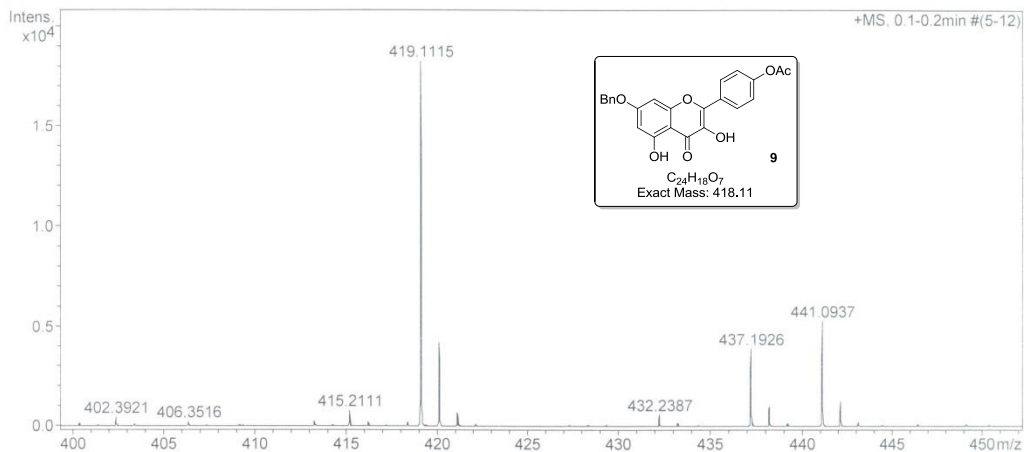

| Meas. m/z | # | Formula                                        | Score  | m/z      | err [ppm] | Mean err [ppm] | mSigma | rdb  | e <sup>-</sup> Conf | N-R rule |
|-----------|---|------------------------------------------------|--------|----------|-----------|----------------|--------|------|---------------------|----------|
| 419.1115  | 1 | C <sub>24</sub> H <sub>19</sub> O <sub>7</sub> | 100.00 | 419.1125 | 2.5       | 2.3            | 14.4   | 15.5 | even                | ok       |

## Mass Spectrum SmartFormula Report

### Analysis Info

Analysis Name D:\Data\USER-2014\mei0716.d  
 Method WU\_tune\_low\_20121222.m  
 Sample Name mei0716  
 Comment

Acquisition Date 9/18/2014 10:02:01 AM

Operator Ma  
 Instrument / Ser# microTOF-Q II 10203

### Acquisition Parameter

|             |            |                       |           |                  |           |
|-------------|------------|-----------------------|-----------|------------------|-----------|
| Source Type | ESI        | Ion Polarity          | Positive  | Set Nebulizer    | 0.4 Bar   |
| Focus       | Not active | Set Capillary         | 4500 V    | Set Dry Heater   | 180 °C    |
| Scan Begin  | 30 m/z     | Set End Plate Offset  | -500 V    | Set Dry Gas      | 3.0 l/min |
| Scan End    | 3000 m/z   | Set Collision Cell RF | 150.0 Vpp | Set Divert Valve | Source    |

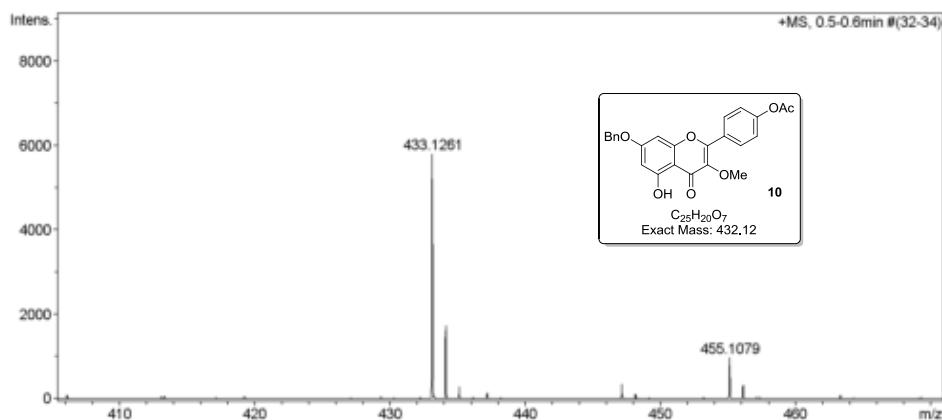

| Meas.<br>m/z | # | Formula                                          | Score  | m/z      | err<br>[ppm] | Mean<br>err<br>[ppm] | mSigma | rdb  | e <sup>-</sup><br>Conf | N-<br>Rules |
|--------------|---|--------------------------------------------------|--------|----------|--------------|----------------------|--------|------|------------------------|-------------|
| 433.1261     | 1 | C <sub>25</sub> H <sub>21</sub> O <sub>7</sub>   | 100.00 | 433.1282 | 4.7          | 4.9                  | 13.0   | 15.5 | even                   | ok          |
| 455.1079     | 1 | C <sub>25</sub> H <sub>20</sub> NaO <sub>7</sub> | 100.00 | 455.1101 | 5.0          | 5.2                  | 38.6   | 15.5 | even                   | ok          |

## Mass Spectrum SmartFormula Report

### Analysis Info

Analysis Name D:\Data\USER-2014\mei37610.d  
 Method WU\_tune\_low\_20121222.m  
 Sample Name mei37610  
 Comment

Acquisition Date 4/23/2014 4:48:20 PM

Operator Ma  
 Instrument / Ser# microTOF-Q II 10203

### Acquisition Parameter

|             |            |                       |           |                  |           |
|-------------|------------|-----------------------|-----------|------------------|-----------|
| Source Type | ESI        | Ion Polarity          | Negative  | Set Nebulizer    | 0.4 Bar   |
| Focus       | Not active | Set Capillary         | 4000 V    | Set Dry Heater   | 180 °C    |
| Scan Begin  | 50 m/z     | Set End Plate Offset  | -500 V    | Set Dry Gas      | 3.0 l/min |
| Scan End    | 3000 m/z   | Set Collision Cell RF | 150.0 Vpp | Set Divert Valve | Source    |

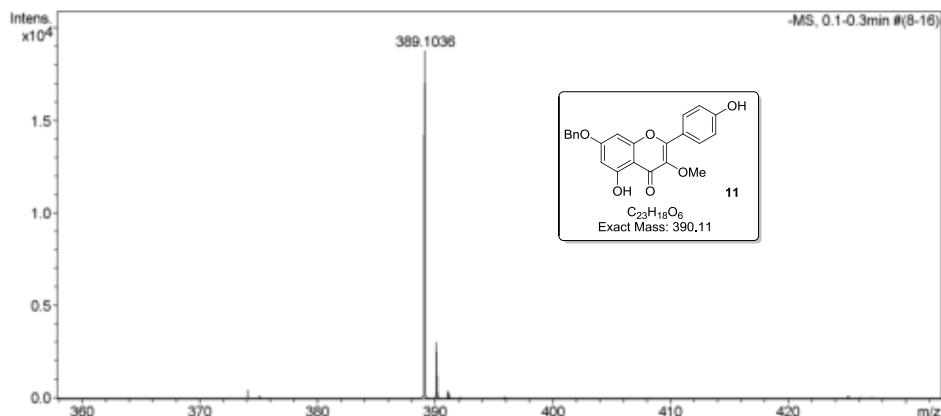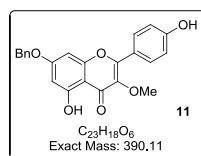

| Meas.<br>m/z | # | Formula                                        | Score  | m/z      | err<br>[ppm] | Mea<br>n err<br>[ppm] | mSig<br>ma | rd<br>b | e <sup>-</sup><br>Conf | N-R<br>ule |
|--------------|---|------------------------------------------------|--------|----------|--------------|-----------------------|------------|---------|------------------------|------------|
| 389.1036     | 1 | C <sub>23</sub> H <sub>17</sub> O <sub>6</sub> | 100.00 | 389.1031 | -1.4         | -1.6                  | 52.1       | 15.5    | even                   | ok         |

## Mass Spectrum SmartFormula Report

### Analysis Info

Analysis Name D:\Data\USER-2014\3300.d  
 Method WU\_tune\_low\_20121222.m  
 Sample Name 3300  
 Comment

Acquisition Date 9/27/2014 1:04:19 PM

Operator Ma  
 Instrument / Ser# microTOF-Q II 10203

### Acquisition Parameter

|             |            |                       |           |                  |           |
|-------------|------------|-----------------------|-----------|------------------|-----------|
| Source Type | ESI        | Ion Polarity          | Negative  | Set Nebulizer    | 0.4 Bar   |
| Focus       | Not active | Set Capillary         | 4000 V    | Set Dry Heater   | 180 °C    |
| Scan Begin  | 30 m/z     | Set End Plate Offset  | -500 V    | Set Dry Gas      | 3.0 l/min |
| Scan End    | 3000 m/z   | Set Collision Cell RF | 150.0 Vpp | Set Divert Valve | Source    |

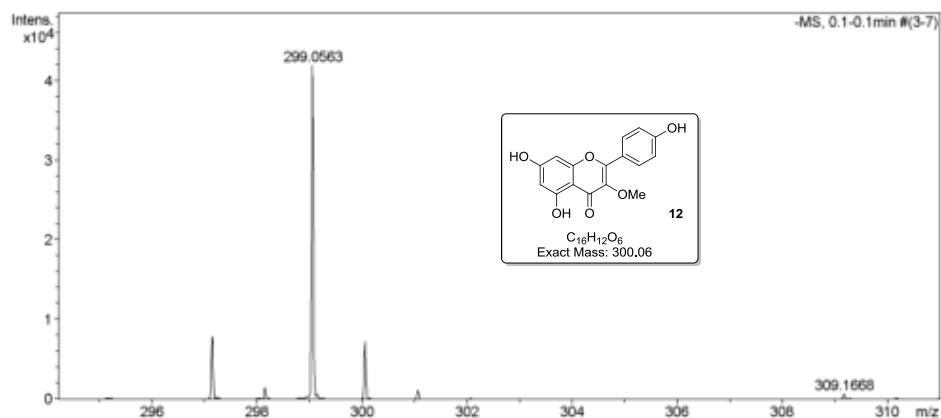

| Meas. m/z | # | Formula                                        | Score  | m/z      | err [ppm] | Mean err [ppm] | mSi gma | rdB  | e <sup>-</sup> Conf | N-R ule |
|-----------|---|------------------------------------------------|--------|----------|-----------|----------------|---------|------|---------------------|---------|
| 299.0563  | 1 | C <sub>16</sub> H <sub>11</sub> O <sub>6</sub> | 100.00 | 299.0561 | -0.5      | -0.1           | 0.8     | 11.5 | even                | ok      |

# Mass Spectrum SmartFormula Report

## Analysis Info

Analysis Name D:\Data\USER-2013\M418.d  
 Method WU\_tune\_low\_20121222.m  
 Sample Name M418  
 Comment

Acquisition Date 3/28/2013 4:28:26 PM

Operator Ma  
 Instrument / Ser# micrOTOF-Q II 10203

## Acquisition Parameter

|             |            |                       |           |                  |           |
|-------------|------------|-----------------------|-----------|------------------|-----------|
| Source Type | ESI        | Ion Polarity          | Negative  | Set Nebulizer    | 0.3 Bar   |
| Focus       | Not active | Set Capillary         | 4000 V    | Set Dry Heater   | 180 °C    |
| Scan Begin  | 50 m/z     | Set End Plate Offset  | -500 V    | Set Dry Gas      | 4.0 l/min |
| Scan End    | 3000 m/z   | Set Collision Cell RF | 150.0 Vpp | Set Divert Valve | Source    |

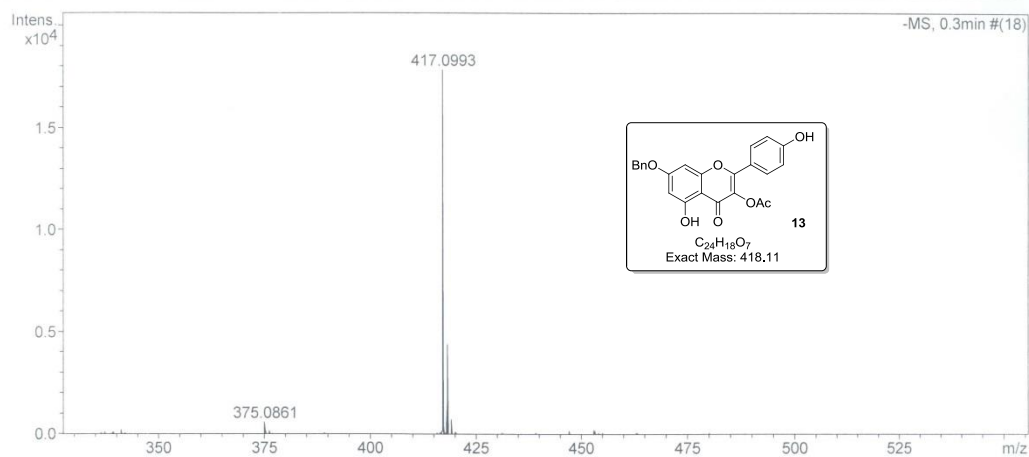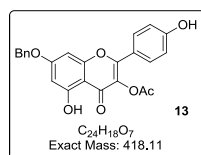

| Meas. m/z | # | Formula                                        | Score  | m/z      | err<br>[ppm] | Mea<br>n err<br>[ppm] | mSi<br>gma | rdB  | e <sup>-</sup><br>Conf | N-R<br>ule |
|-----------|---|------------------------------------------------|--------|----------|--------------|-----------------------|------------|------|------------------------|------------|
| 417.0993  | 1 | C <sub>24</sub> H <sub>17</sub> O <sub>7</sub> | 100.00 | 417.0980 | -3.2         | -3.0                  | 7.9        | 16.5 | even                   | ok         |



## Mass Spectrum SmartFormula Report

### Analysis Info

Analysis Name D:\Data\USER-2014\mei51316.d  
 Method WU\_tune\_low\_20121222.m  
 Sample Name mei51316  
 Comment

Acquisition Date 9/18/2014 10:17:32 AM

Operator Ma  
 Instrument / Ser# microTOF-Q II 10203

### Acquisition Parameter

|             |            |                       |           |                  |           |
|-------------|------------|-----------------------|-----------|------------------|-----------|
| Source Type | ESI        | Ion Polarity          | Positive  | Set Nebulizer    | 0.4 Bar   |
| Focus       | Not active | Set Capillary         | 4500 V    | Set Dry Heater   | 180 °C    |
| Scan Begin  | 30 m/z     | Set End Plate Offset  | -500 V    | Set Dry Gas      | 3.0 l/min |
| Scan End    | 3000 m/z   | Set Collision Cell RF | 150.0 Vpp | Set Divert Valve | Source    |

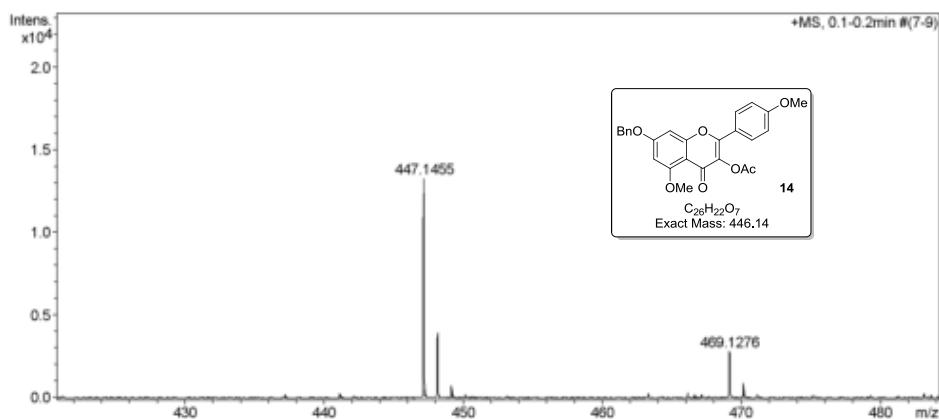

| Meas.<br>m/z | # | Formula                                          | Score  | m/z      | err<br>[ppm] | Mea<br>n err<br>[ppm] | mSig<br>ma | rdb  | e <sup>-</sup><br>Conf | N-<br>Rule |
|--------------|---|--------------------------------------------------|--------|----------|--------------|-----------------------|------------|------|------------------------|------------|
| 447.1455     | 1 | C <sub>26</sub> H <sub>23</sub> O <sub>7</sub>   | 100.00 | 447.1438 | -3.8         | -3.5                  | 9.5        | 15.5 | even                   | ok         |
| 469.1276     | 1 | C <sub>26</sub> H <sub>22</sub> NaO <sub>7</sub> | 100.00 | 469.1258 | -3.8         | -2.4                  | 16.0       | 15.5 | even                   | ok         |

## Mass Spectrum SmartFormula Report

### Analysis Info

Analysis Name D:\Data\USER-2014\8328.d  
 Method WU\_tune\_low\_20121222.m  
 Sample Name 8328  
 Comment

Acquisition Date 9/27/2014 12:58:26 PM

Operator Ma  
 Instrument / Ser# microTOF-Q II 10203

### Acquisition Parameter

|             |            |                       |           |                  |           |
|-------------|------------|-----------------------|-----------|------------------|-----------|
| Source Type | ESI        | Ion Polarity          | Positive  | Set Nebulizer    | 0.4 Bar   |
| Focus       | Not active | Set Capillary         | 4500 V    | Set Dry Heater   | 180 °C    |
| Scan Begin  | 30 m/z     | Set End Plate Offset  | -500 V    | Set Dry Gas      | 3.0 l/min |
| Scan End    | 3000 m/z   | Set Collision Cell RF | 150.0 Vpp | Set Divert Valve | Source    |

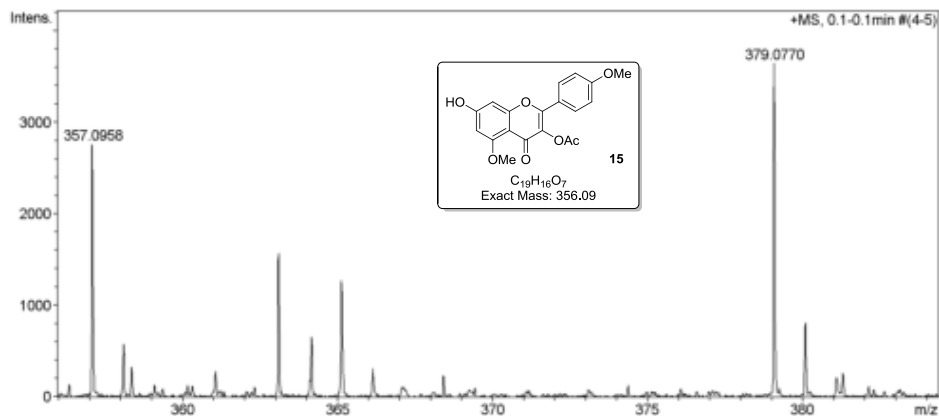

| Meas. m/z | # | Formula                                          | Score  | m/z      | err [ppm] | Mean err [ppm] | mSigma | rdb  | e <sup>-</sup> Conf | N-Rule |
|-----------|---|--------------------------------------------------|--------|----------|-----------|----------------|--------|------|---------------------|--------|
| 357.0958  | 1 | C <sub>19</sub> H <sub>17</sub> O <sub>7</sub>   | 100.00 | 357.0969 | 3.0       | 3.4            | 20.0   | 11.5 | even                | ok     |
| 379.0770  | 1 | C <sub>19</sub> H <sub>16</sub> NaO <sub>7</sub> | 100.00 | 379.0788 | 4.9       | 3.1            | 16.9   | 11.5 | even                | ok     |

## Mass Spectrum SmartFormula Report

### Analysis Info

Analysis Name D:\Data\USER-2014\mei0705.d  
 Method WU\_tune\_low\_20121222.m  
 Sample Name mei0705  
 Comment

Acquisition Date 9/18/2014 10:08:49 AM

Operator Ma  
 Instrument / Ser# micrOTOF-Q II 10203

### Acquisition Parameter

|             |            |                       |           |                  |           |
|-------------|------------|-----------------------|-----------|------------------|-----------|
| Source Type | ESI        | Ion Polarity          | Positive  | Set Nebulizer    | 0.4 Bar   |
| Focus       | Not active | Set Capillary         | 4500 V    | Set Dry Heater   | 180 °C    |
| Scan Begin  | 30 m/z     | Set End Plate Offset  | -500 V    | Set Dry Gas      | 3.0 l/min |
| Scan End    | 3000 m/z   | Set Collision Cell RF | 150.0 Vpp | Set Divert Valve | Source    |

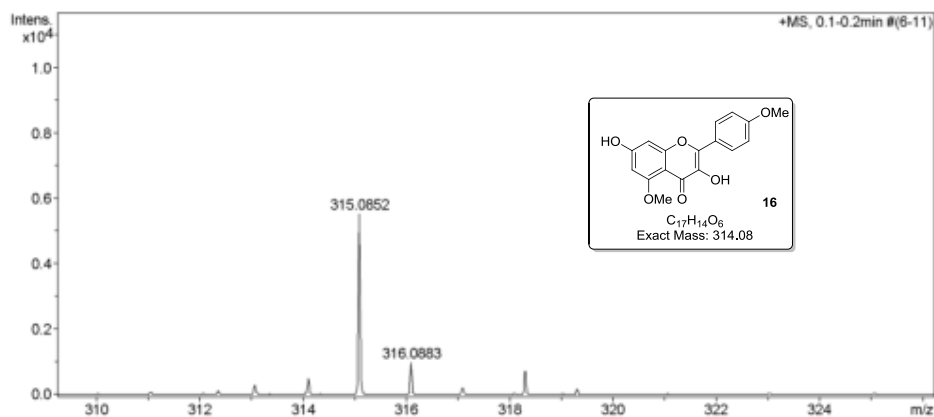

| Meas. m/z | # | Formula       | Score  | m/z      | err [ppm] | Meas. n err [ppm] | mSig ma | rdB  | e <sup>-</sup> Conf | N-R ule |
|-----------|---|---------------|--------|----------|-----------|-------------------|---------|------|---------------------|---------|
| 315.0852  | 1 | C 17 H 15 O 6 | 100.00 | 315.0863 | 3.5       | 3.6               | 16.6    | 10.5 | even                | ok      |

# Mass Spectrum SmartFormula Report

## Analysis Info

Analysis Name D:\Data\USER-2013\MEI390-2.d  
 Method WU\_tune\_low\_20121222-negative.m  
 Sample Name MEI390-2  
 Comment

Acquisition Date 4/16/2013 4:50:18 PM

Operator Ma  
 Instrument / Ser# micrOTOF-Q II 10203

## Acquisition Parameter

|             |            |                       |           |                  |           |
|-------------|------------|-----------------------|-----------|------------------|-----------|
| Source Type | ESI        | Ion Polarity          | Negative  | Set Nebulizer    | 0.3 Bar   |
| Focus       | Not active | Set Capillary         | 4000 V    | Set Dry Heater   | 180 °C    |
| Scan Begin  | 50 m/z     | Set End Plate Offset  | -500 V    | Set Dry Gas      | 4.0 l/min |
| Scan End    | 3000 m/z   | Set Collision Cell RF | 150.0 Vpp | Set Divert Valve | Source    |

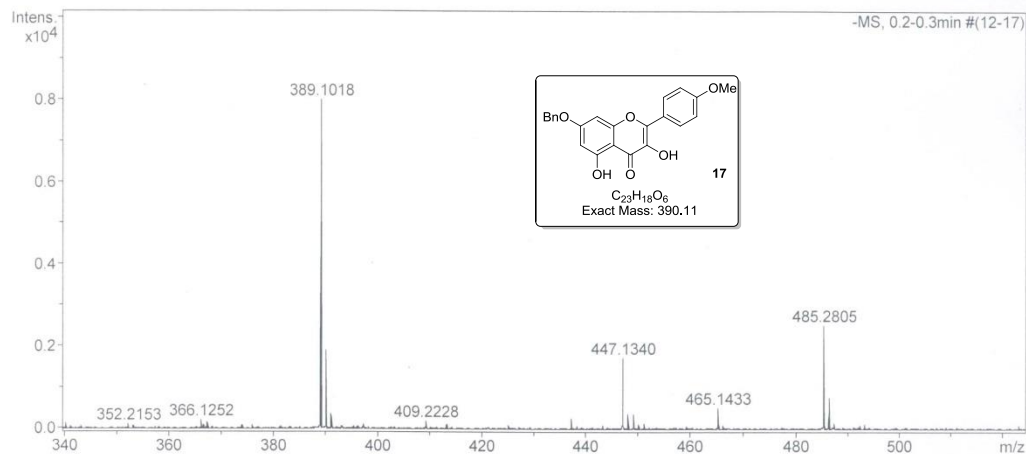

| Meas. m/z | # | Formula                                        | Score  | m/z      | err [ppm] | Meas n err [ppm] | mSi gma | rdb  | e <sup>-</sup> Conf | N-R ule |
|-----------|---|------------------------------------------------|--------|----------|-----------|------------------|---------|------|---------------------|---------|
| 389.1018  | 1 | C <sub>23</sub> H <sub>17</sub> O <sub>6</sub> | 100.00 | 389.1031 | 3.2       | 2.6              | 5.5     | 15.5 | even                | ok      |

# Mass Spectrum SmartFormula Report

## Analysis Info

Analysis Name D:\Data\USER-2013\mei300.d  
 Method WU\_tune\_low\_20121222.m  
 Sample Name mei300  
 Comment

Acquisition Date 10/15/2013 11:45:54 AM

Operator Ma  
 Instrument / Ser# micrOTOF-Q II 10203

## Acquisition Parameter

|             |            |                       |           |                  |           |
|-------------|------------|-----------------------|-----------|------------------|-----------|
| Source Type | ESI        | Ion Polarity          | Positive  | Set Nebulizer    | 0.4 Bar   |
| Focus       | Not active | Set Capillary         | 4500 V    | Set Dry Heater   | 100 °C    |
| Scan Begin  | 50 m/z     | Set End Plate Offset  | -500 V    | Set Dry Gas      | 3.0 l/min |
| Scan End    | 3000 m/z   | Set Collision Cell RF | 150.0 Vpp | Set Divert Valve | Source    |

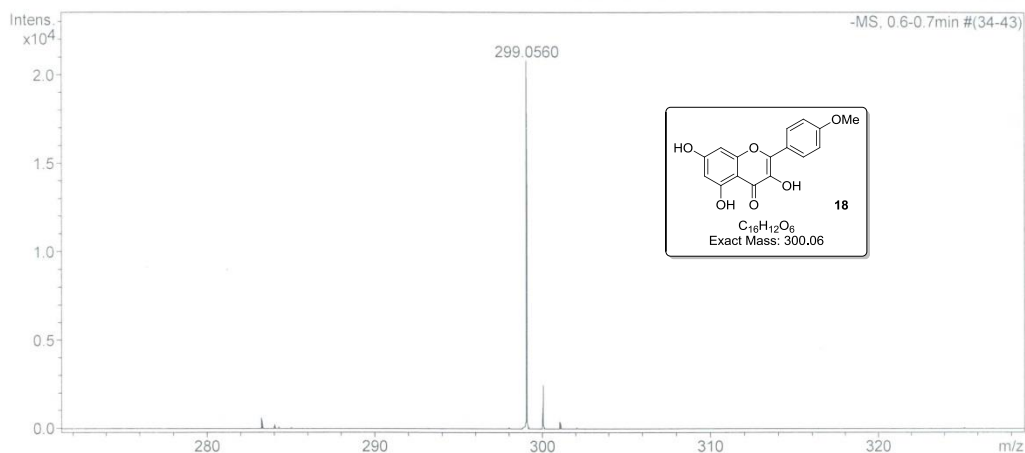

| Meas.<br>m/z | # | Formula                                        | Score  | m/z      | err<br>[ppm] | Mean<br>err<br>[ppm] | mSig<br>ma | rdb  | e <sup>-</sup><br>Conf | N-R<br>ule |
|--------------|---|------------------------------------------------|--------|----------|--------------|----------------------|------------|------|------------------------|------------|
| 299.0560     | 1 | C <sub>16</sub> H <sub>11</sub> O <sub>6</sub> | 100.00 | 299.0561 | 0.3          | -0.2                 | 32.2       | 11.5 | even                   | ok         |

## Mass Spectrum SmartFormula Report

### Analysis Info

Analysis Name D:\Data\USER-2014\mei39045.d  
 Method WU\_tune\_low\_20121222.m  
 Sample Name mei39045  
 Comment

Acquisition Date 4/23/2014 4:58:39 PM

Operator Ma  
 Instrument / Ser# microTOF-Q II 10203

### Acquisition Parameter

|             |            |                       |           |                  |           |
|-------------|------------|-----------------------|-----------|------------------|-----------|
| Source Type | ESI        | Ion Polarity          | Negative  | Set Nebulizer    | 0.4 Bar   |
| Focus       | Not active | Set Capillary         | 4000 V    | Set Dry Heater   | 180 °C    |
| Scan Begin  | 50 m/z     | Set End Plate Offset  | -500 V    | Set Dry Gas      | 3.0 l/min |
| Scan End    | 3000 m/z   | Set Collision Cell RF | 150.0 Vpp | Set Divert Valve | Source    |

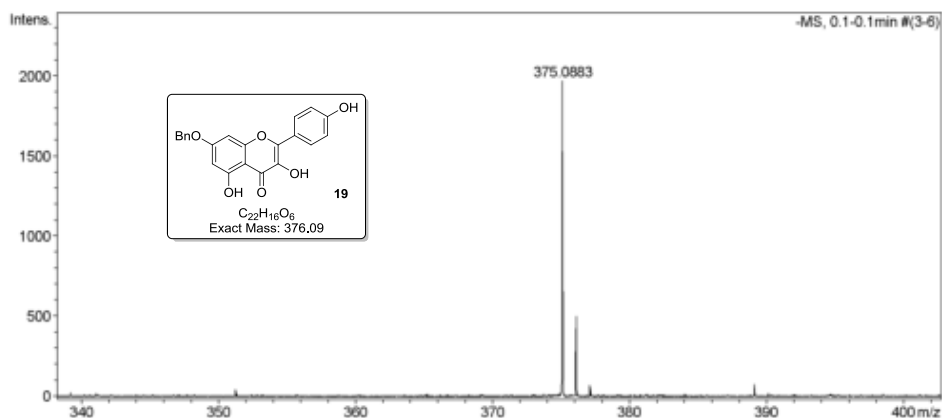

| Meas.<br>m/z | # | Formula                                        | Score  | m/z      | err<br>[ppm] | Mea<br>n err<br>[ppm] | mSig<br>ma | rdb  | e <sup>-</sup><br>Conf | N-R<br>ule |
|--------------|---|------------------------------------------------|--------|----------|--------------|-----------------------|------------|------|------------------------|------------|
| 375.0883     | 1 | C <sub>22</sub> H <sub>16</sub> O <sub>6</sub> | 100.00 | 375.0874 | -2.4         | -2.4                  | 24.6       | 15.5 | even                   | ok         |

## Mass Spectrum SmartFormula Report

### Analysis Info

Analysis Name D:\Data\USER-2014\mei37603+.d  
 Method WU\_tune\_low\_20121222.m  
 Sample Name mei37603+  
 Comment

Acquisition Date 4/23/2014 5:21:10 PM

Operator Ma  
 Instrument / Ser# micrOTOF-Q II 10203

### Acquisition Parameter

|             |            |                       |           |                  |           |
|-------------|------------|-----------------------|-----------|------------------|-----------|
| Source Type | ESI        | Ion Polarity          | Positive  | Set Nebulizer    | 0.4 Bar   |
| Focus       | Not active | Set Capillary         | 4500 V    | Set Dry Heater   | 180 °C    |
| Scan Begin  | 50 m/z     | Set End Plate Offset  | -500 V    | Set Dry Gas      | 3.0 l/min |
| Scan End    | 3000 m/z   | Set Collision Cell RF | 150.0 Vpp | Set Divert Valve | Source    |

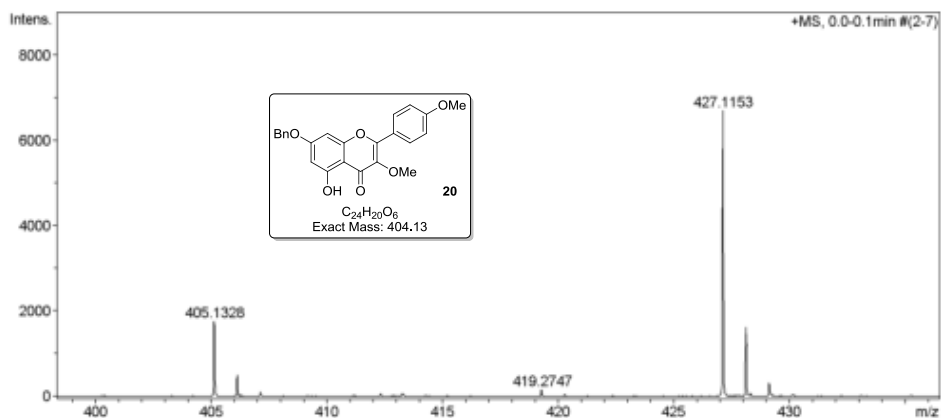

| Meas. m/z | # | Formula          | Score  | m/z      | err [ppm] | Mean err [ppm] | mSigma | rob  | e <sup>-</sup> Conf | N-Rule |
|-----------|---|------------------|--------|----------|-----------|----------------|--------|------|---------------------|--------|
| 405.1328  | 1 | C 24 H 21 O 6    | 100.00 | 405.1333 | 1.1       | 2.2            | 30.6   | 14.5 | even                | ok     |
| 427.1153  | 1 | C 24 H 20 Na O 6 | 100.00 | 427.1152 | -0.2      | 0.1            | 11.5   | 14.5 | even                | ok     |

## Mass Spectrum SmartFormula Report

### Analysis Info

Analysis Name D:\Data\USER-2014\mei418sj.d  
 Method WU\_tune\_low\_20121222.m  
 Sample Name mei418sj  
 Comment

Acquisition Date 9/18/2014 10:14:43 AM

Operator Ma  
 Instrument / Ser# microTOF-Q II 10203

### Acquisition Parameter

|             |            |                       |           |                  |           |
|-------------|------------|-----------------------|-----------|------------------|-----------|
| Source Type | ESI        | Ion Polarity          | Positive  | Set Nebulizer    | 0.4 Bar   |
| Focus       | Not active | Set Capillary         | 4500 V    | Set Dry Heater   | 180 °C    |
| Scan Begin  | 30 m/z     | Set End Plate Offset  | -500 V    | Set Dry Gas      | 3.0 l/min |
| Scan End    | 3000 m/z   | Set Collision Cell RF | 150.0 Vpp | Set Divert Valve | Source    |

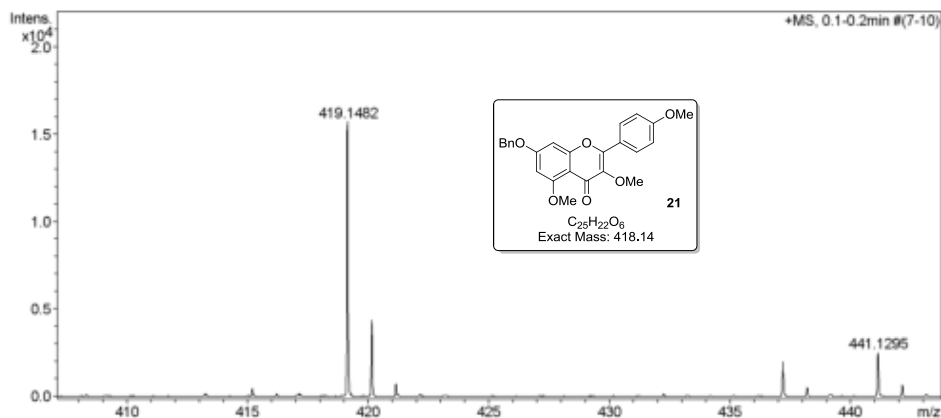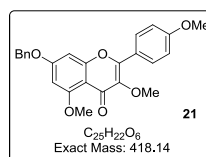

| Meas. m/z | # | Formula                                          | Score  | m/z      | err [ppm] | Mea n err [ppm] | mSi gma | rdb  | e <sup>-</sup> Conf | N-R ule |
|-----------|---|--------------------------------------------------|--------|----------|-----------|-----------------|---------|------|---------------------|---------|
| 419.1482  | 1 | C <sub>25</sub> H <sub>23</sub> O <sub>6</sub>   | 100.00 | 419.1489 | 1.8       | 1.7             | 3.1     | 14.5 | even                | ok      |
| 441.1295  | 1 | C <sub>25</sub> H <sub>22</sub> NaO <sub>6</sub> | 100.00 | 441.1309 | 3.1       | 2.6             | 5.5     | 14.5 | even                | ok      |



## Mass Spectrum SmartFormula Report

### Analysis Info

Analysis Name D:\Data\USER-2014\mei3314.d  
 Method WU\_tune\_low\_20121222.m  
 Sample Name mei3314  
 Comment

Acquisition Date 9/17/2014 2:58:17 PM

Operator Ma  
 Instrument / Ser# micrOTOF-Q II 10203

### Acquisition Parameter

|             |            |                       |           |                  |           |
|-------------|------------|-----------------------|-----------|------------------|-----------|
| Source Type | ESI        | Ion Polarity          | Positive  | Set Nebulizer    | 0.4 Bar   |
| Focus       | Not active | Set Capillary         | 4500 V    | Set Dry Heater   | 180 °C    |
| Scan Begin  | 30 m/z     | Set End Plate Offset  | -500 V    | Set Dry Gas      | 3.0 l/min |
| Scan End    | 3000 m/z   | Set Collision Cell RF | 150.0 Vpp | Set Divert Valve | Source    |

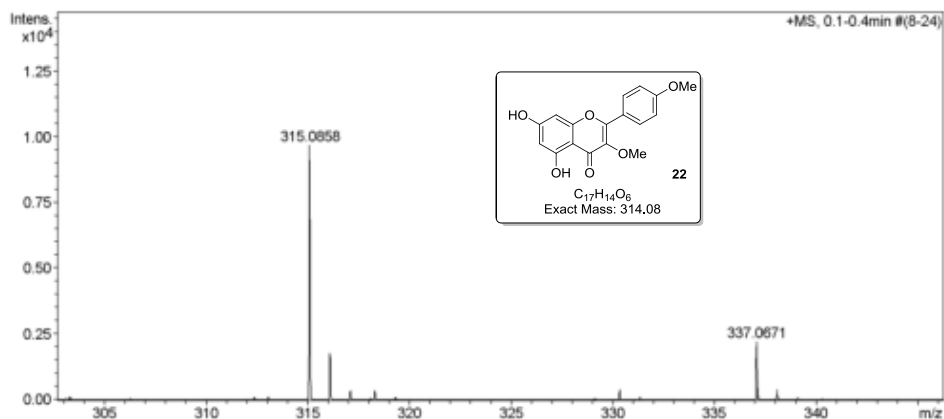

| Meas. m/z | # | Formula                                          | Score  | m/z      | err [ppm] | Meas. err [ppm] | mSig  | rdb  | e <sup>-</sup> Conf | N-Rule |
|-----------|---|--------------------------------------------------|--------|----------|-----------|-----------------|-------|------|---------------------|--------|
| 315.0858  | 1 | C <sub>17</sub> H <sub>15</sub> O <sub>6</sub>   | 100.00 | 315.0863 | 1.6       | 1.6             | 107.4 | 10.5 | even                | ok     |
| 337.0671  | 1 | C <sub>17</sub> H <sub>14</sub> NaO <sub>6</sub> | 100.00 | 337.0683 | 3.5       | 3.5             | 107.4 | 10.5 | even                | ok     |

## Mass Spectrum SmartFormula Report

### Analysis Info

Analysis Name D:\Data\USER-2014\mei9328.d  
 Method WU\_tune\_low\_20121222.m  
 Sample Name mei9328  
 Comment

Acquisition Date 9/17/2014 2:43:47 PM

Operator Ma  
 Instrument / Ser# micrOTOF-Q II 10203

### Acquisition Parameter

|             |            |                       |           |                  |           |
|-------------|------------|-----------------------|-----------|------------------|-----------|
| Source Type | ESI        | Ion Polarity          | Positive  | Set Nebulizer    | 0.4 Bar   |
| Focus       | Not active | Set Capillary         | 4500 V    | Set Dry Heater   | 180 °C    |
| Scan Begin  | 30 m/z     | Set End Plate Offset  | -500 V    | Set Dry Gas      | 3.0 l/min |
| Scan End    | 3000 m/z   | Set Collision Cell RF | 150.0 Vpp | Set Divert Valve | Source    |

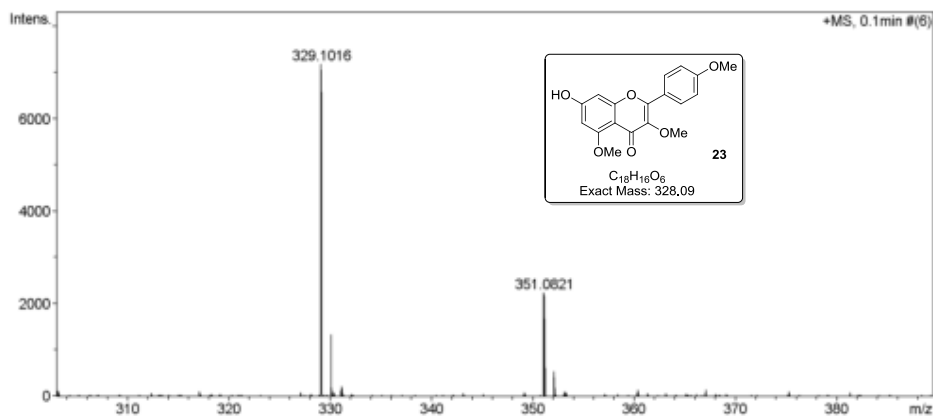

| Meas.<br>m/z | # | Formula                                           | Score  | m/z      | err<br>[ppm] | Meas<br>err<br>[ppm] | mSig<br>ma | rdB  | e <sup>-</sup><br>Conf | N-<br>Rule |
|--------------|---|---------------------------------------------------|--------|----------|--------------|----------------------|------------|------|------------------------|------------|
| 329.1016     | 1 | C <sub>18</sub> H <sub>17</sub> O <sub>6</sub>    | 100.00 | 329.1020 | 1.2          | 1.8                  | 18.2       | 10.5 | even                   | ok         |
| 351.0821     | 1 | C <sub>15</sub> H <sub>8</sub> N <sub>10</sub> Na | 100.00 | 351.0826 | 1.2          | 1.1                  | 24.6       | 16.5 | even                   | ok         |

## NOESY Spectrum of Compound 4

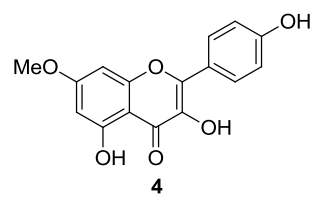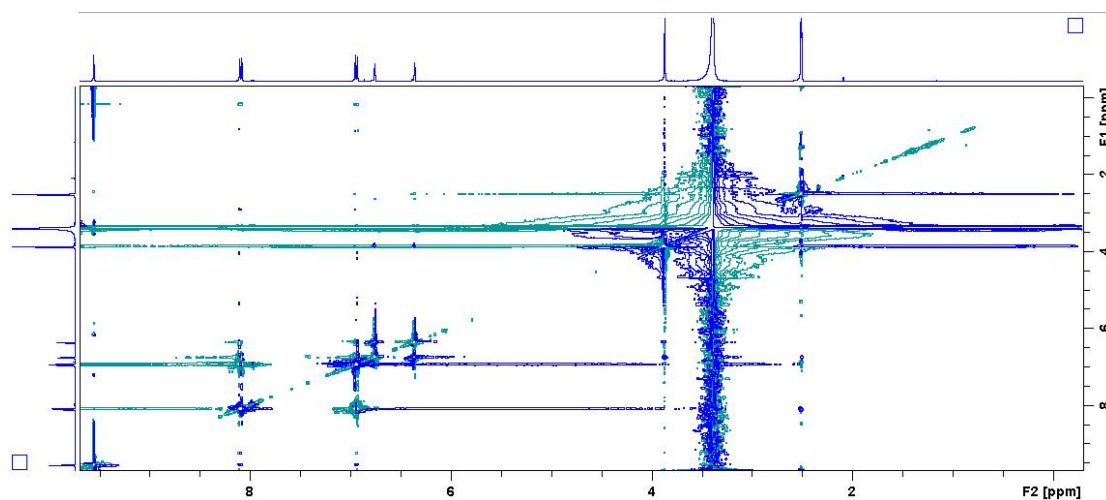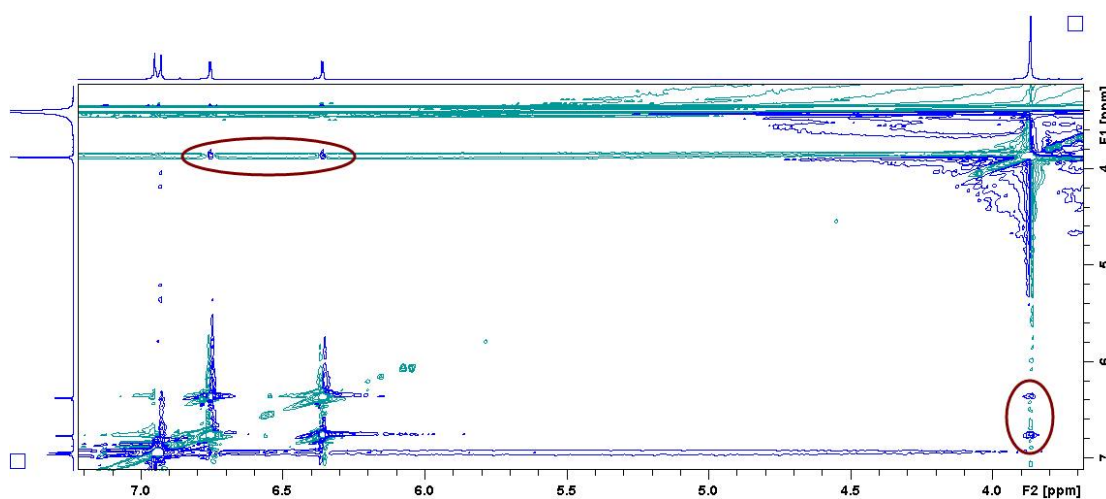

# NOESY Spectrum of Compound **13**

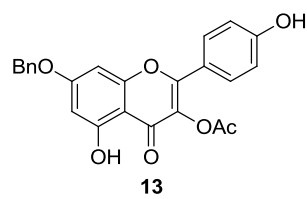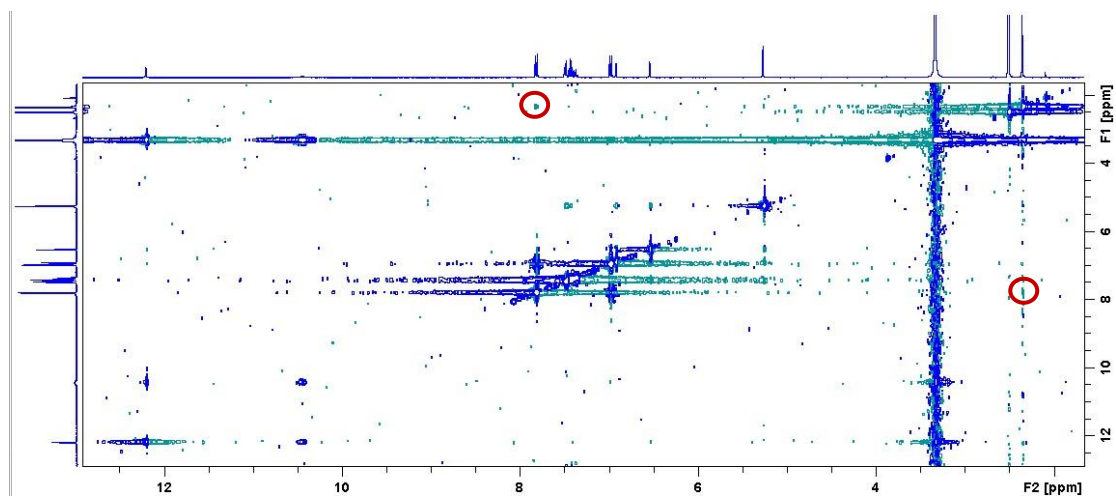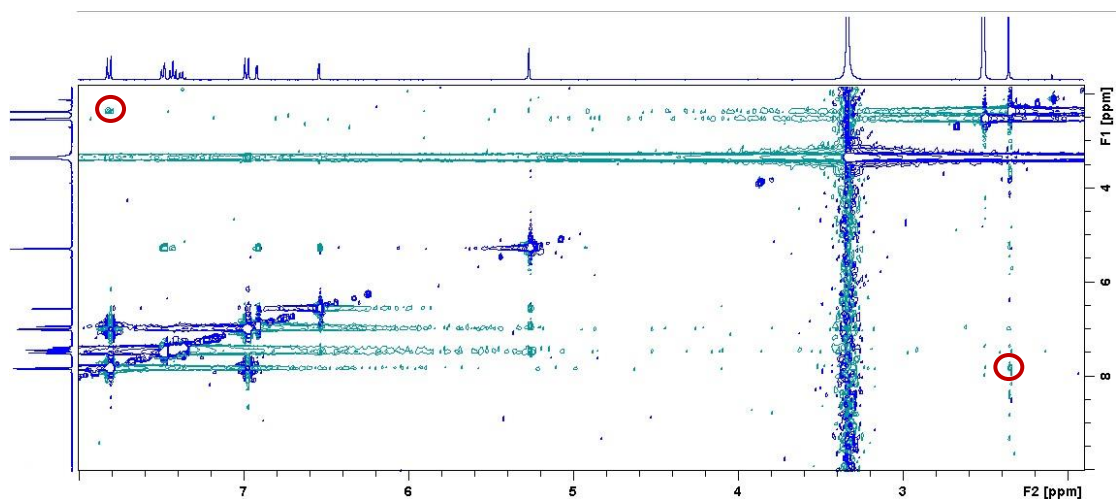

# HMBC Spectrum of Compound 4

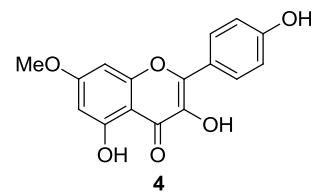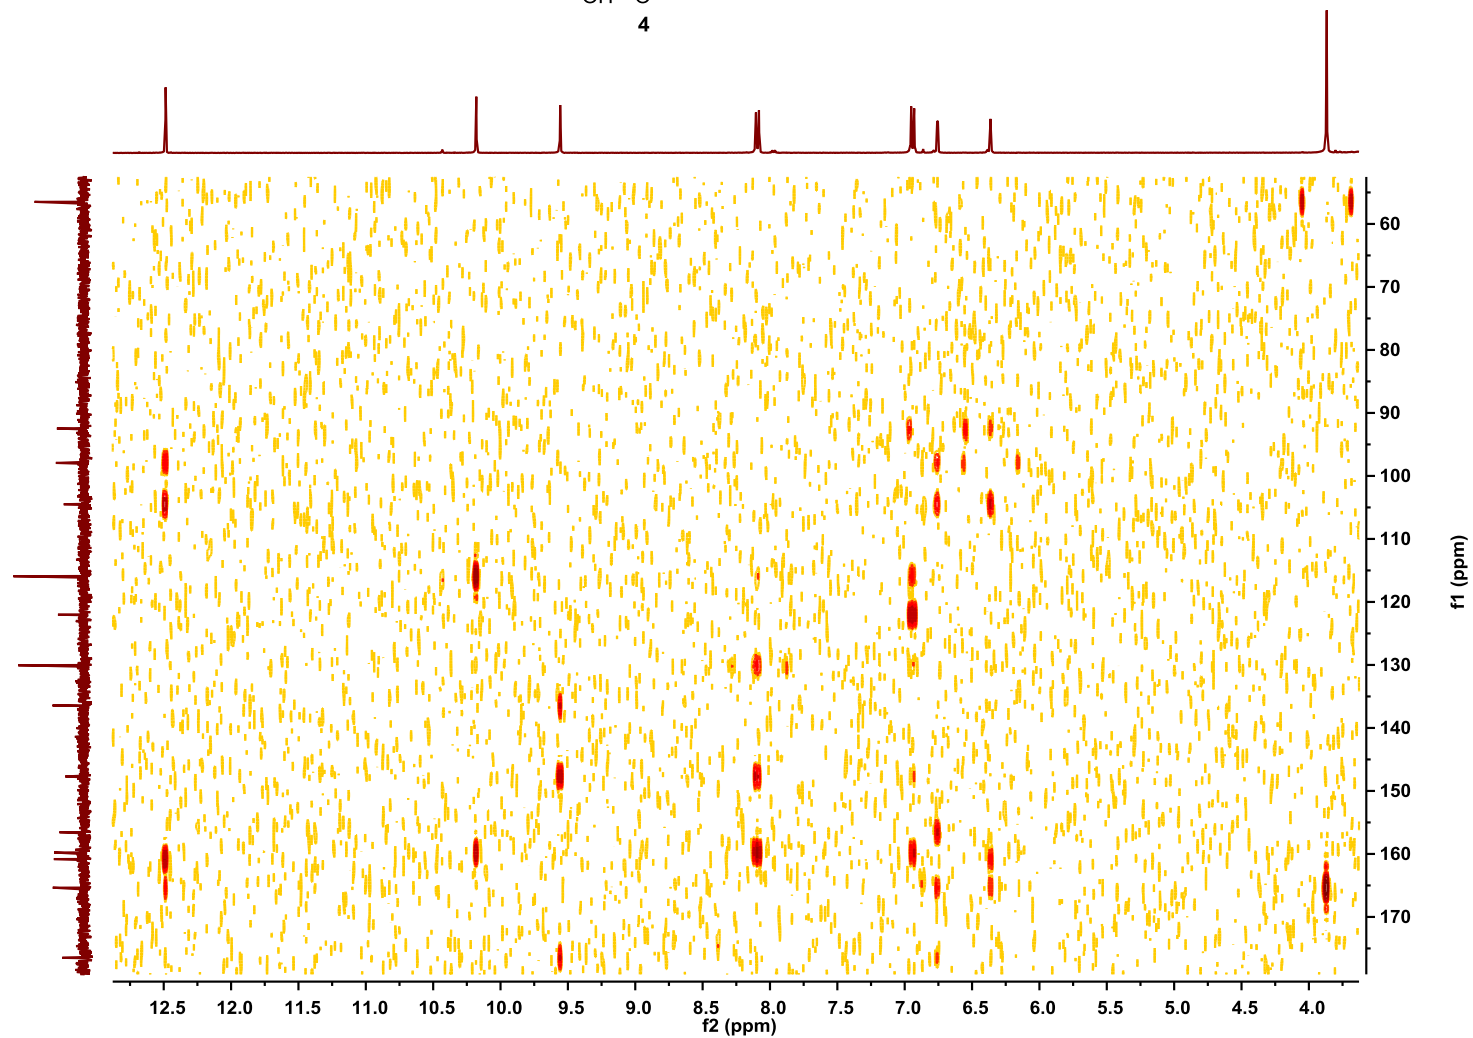

# HMBC Spectrum of Compound 5

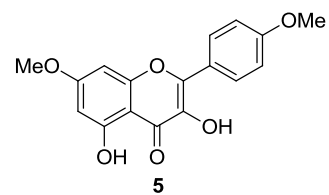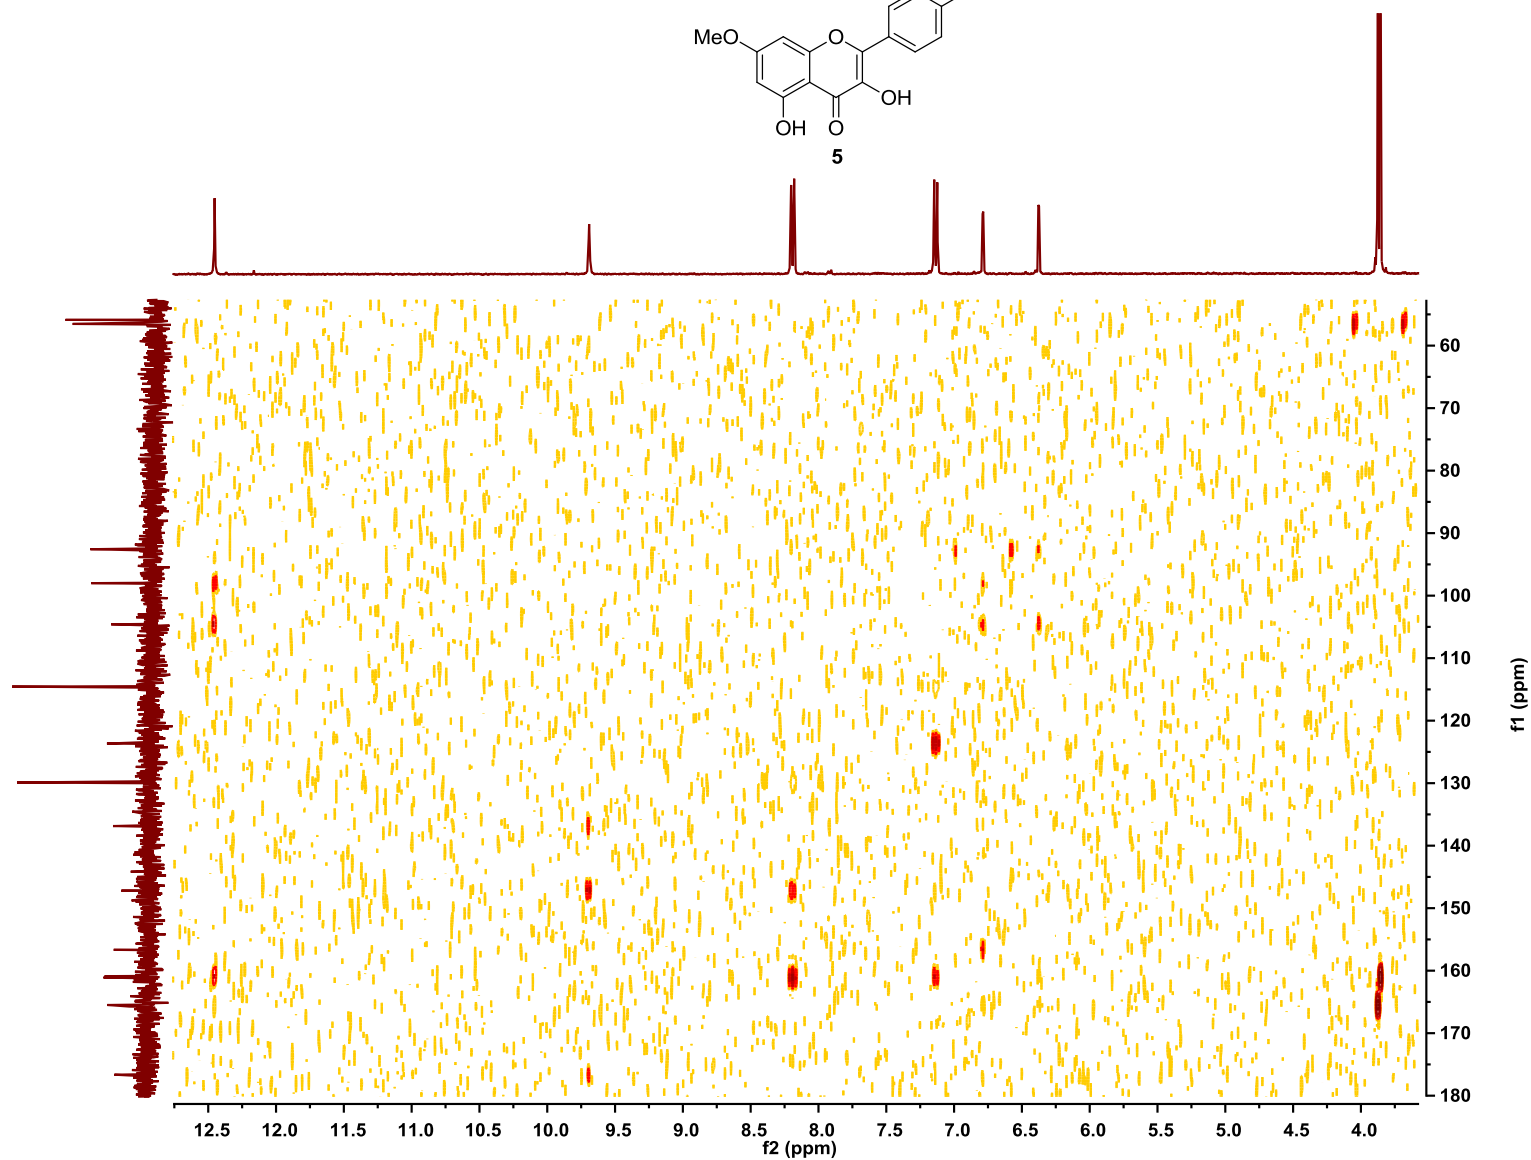

# HMBC Spectrum of Compound 7

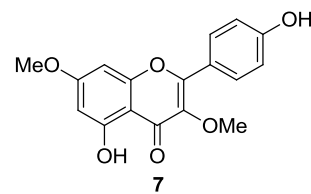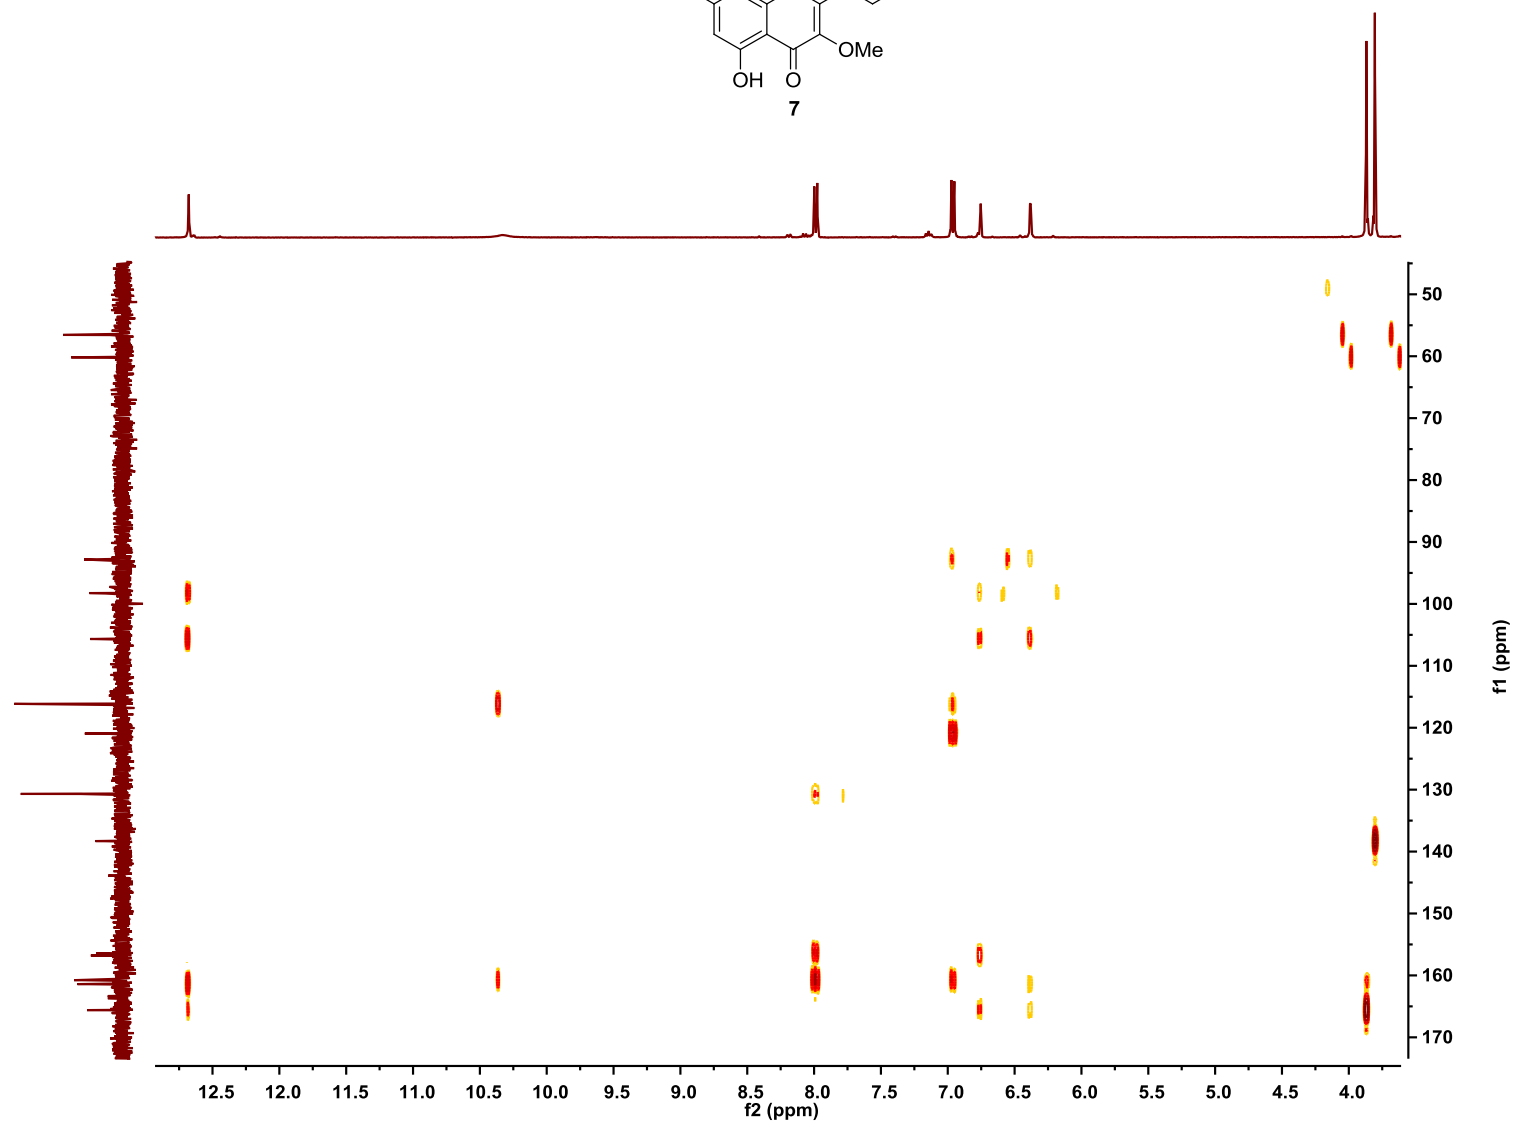

# HMBC Spectrum of Compound **9**

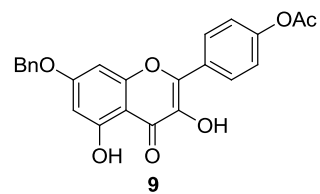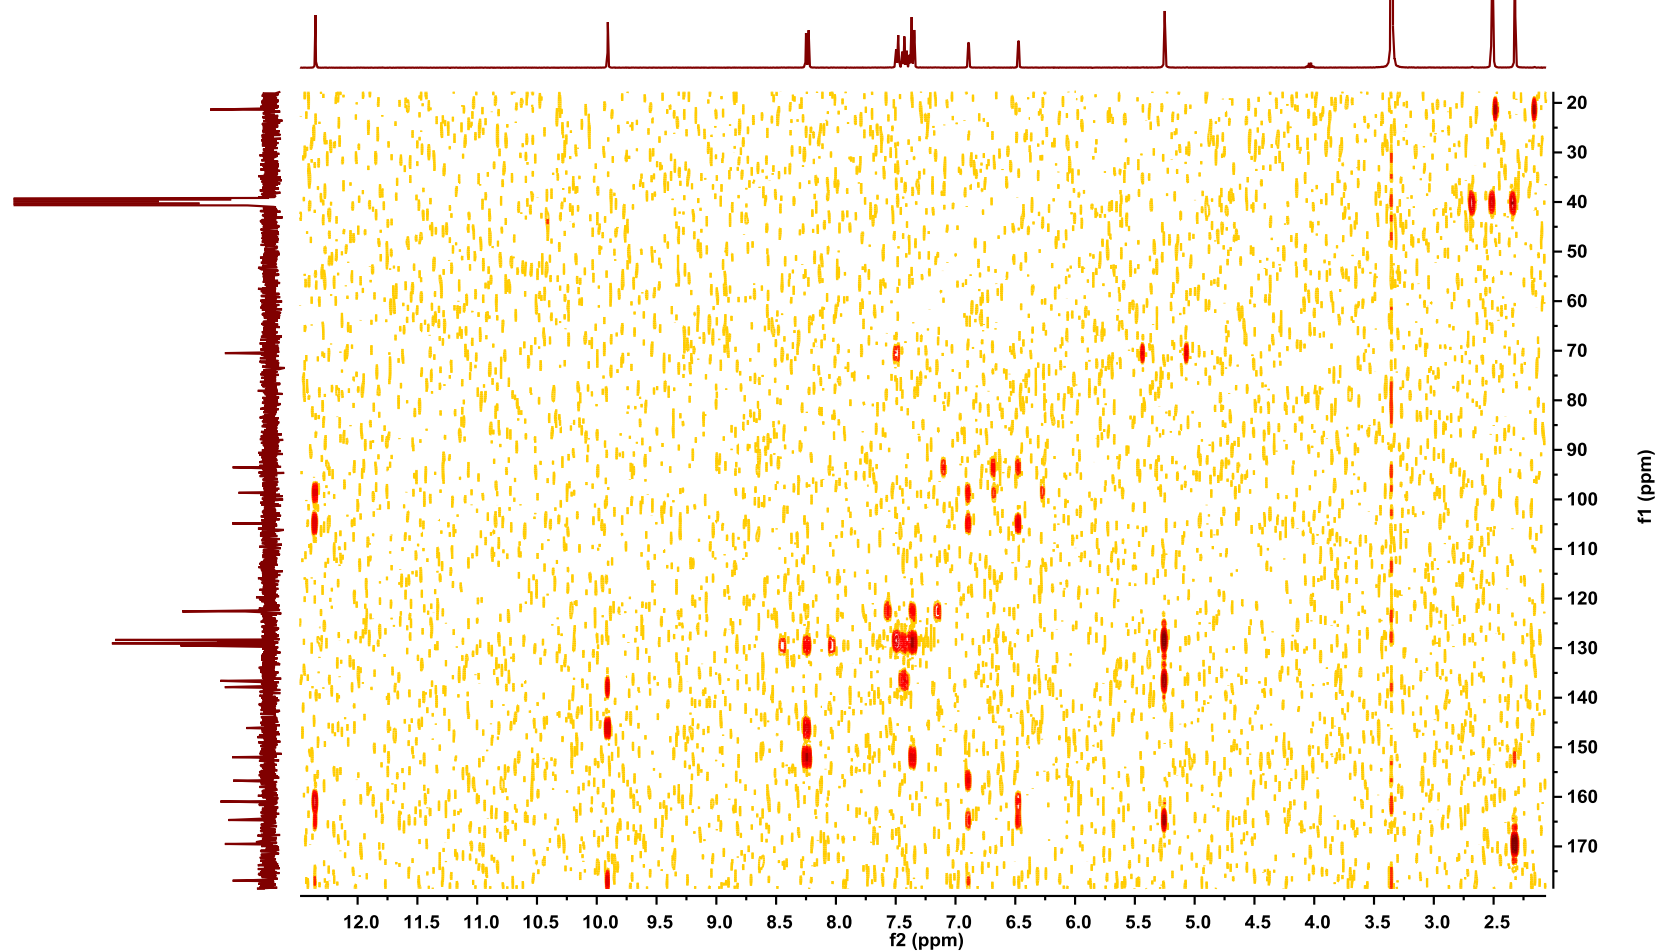



# HMBC Spectrum of Compound 12

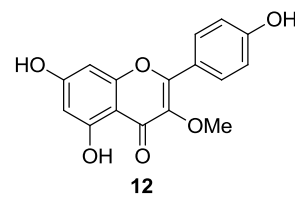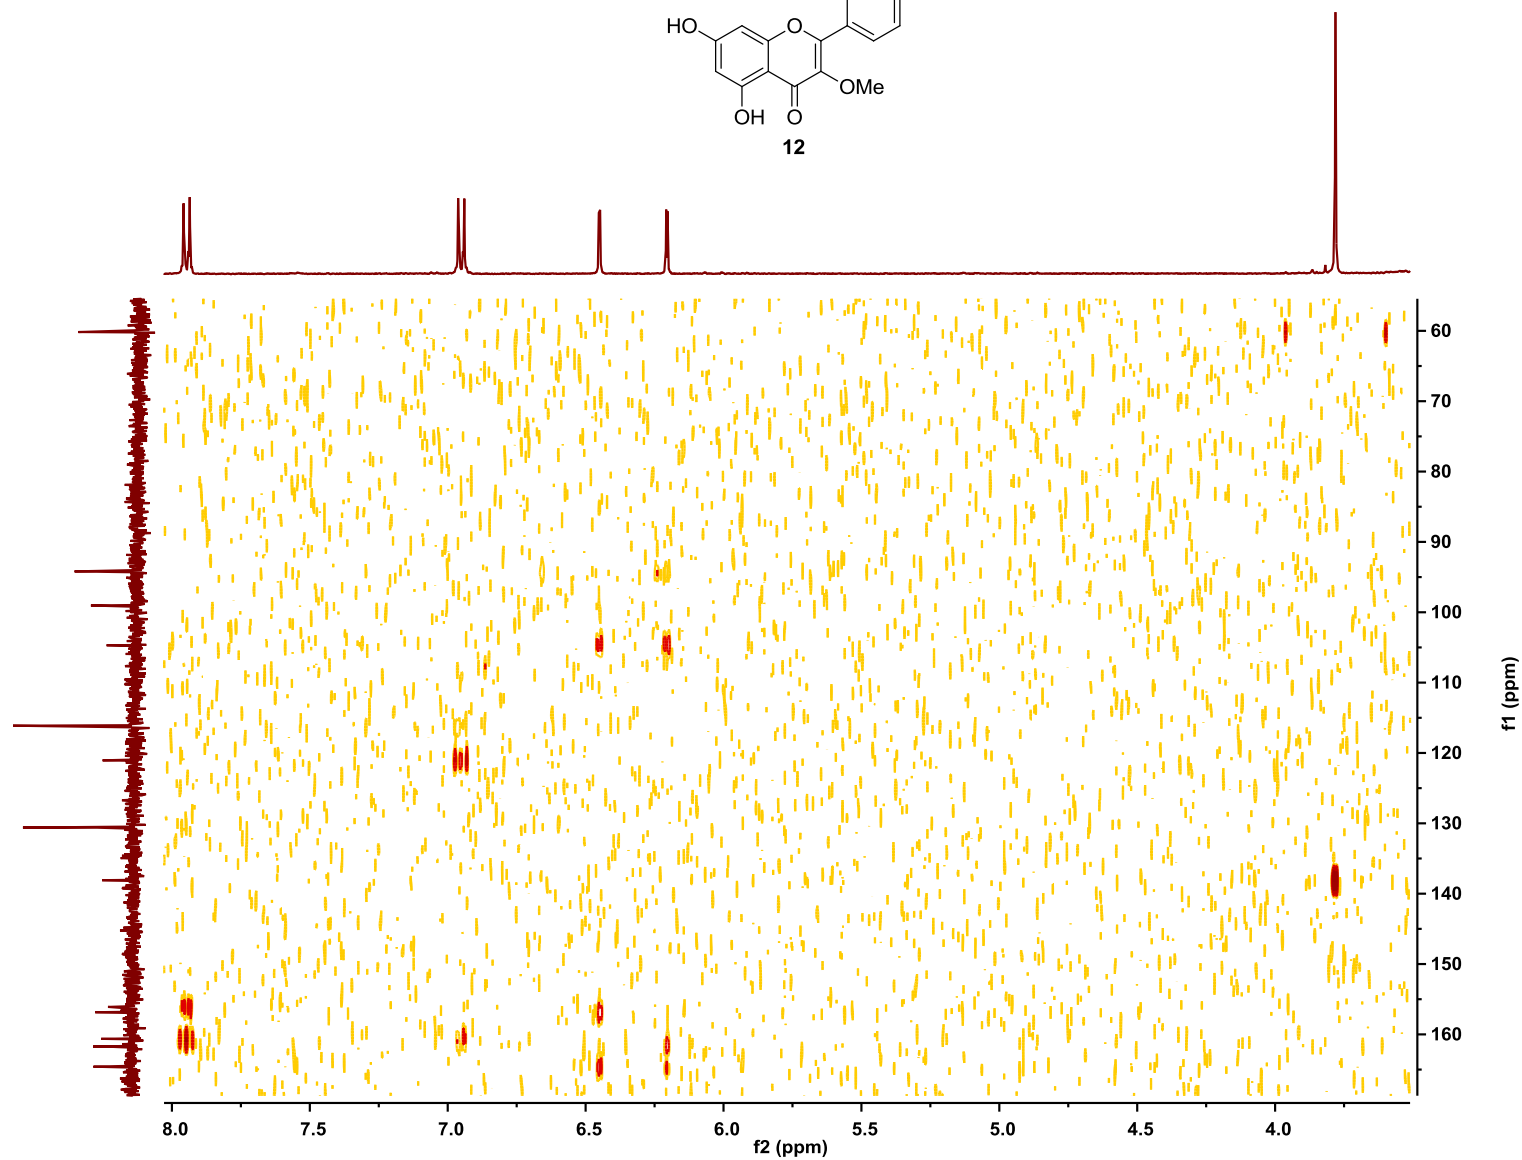

# HMBC Spectrum of Compound 13

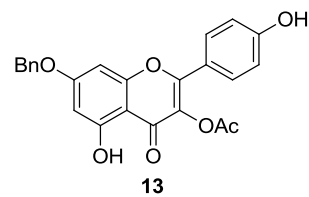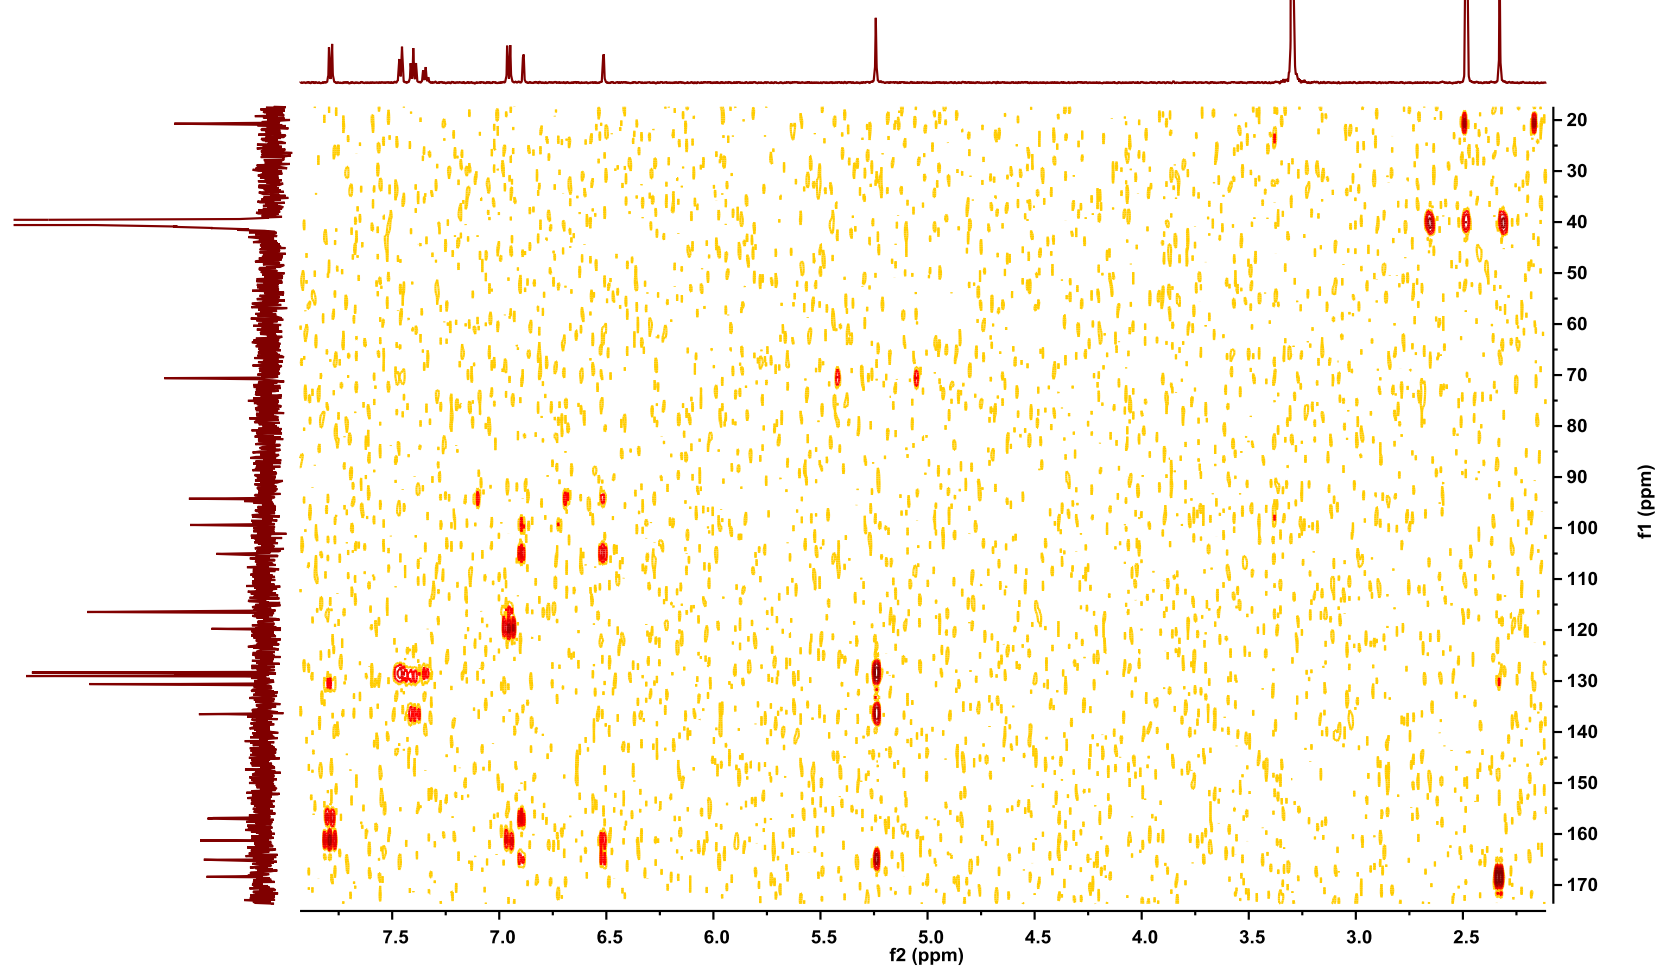

# HMBC Spectrum of Compound **16**

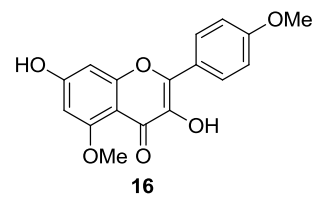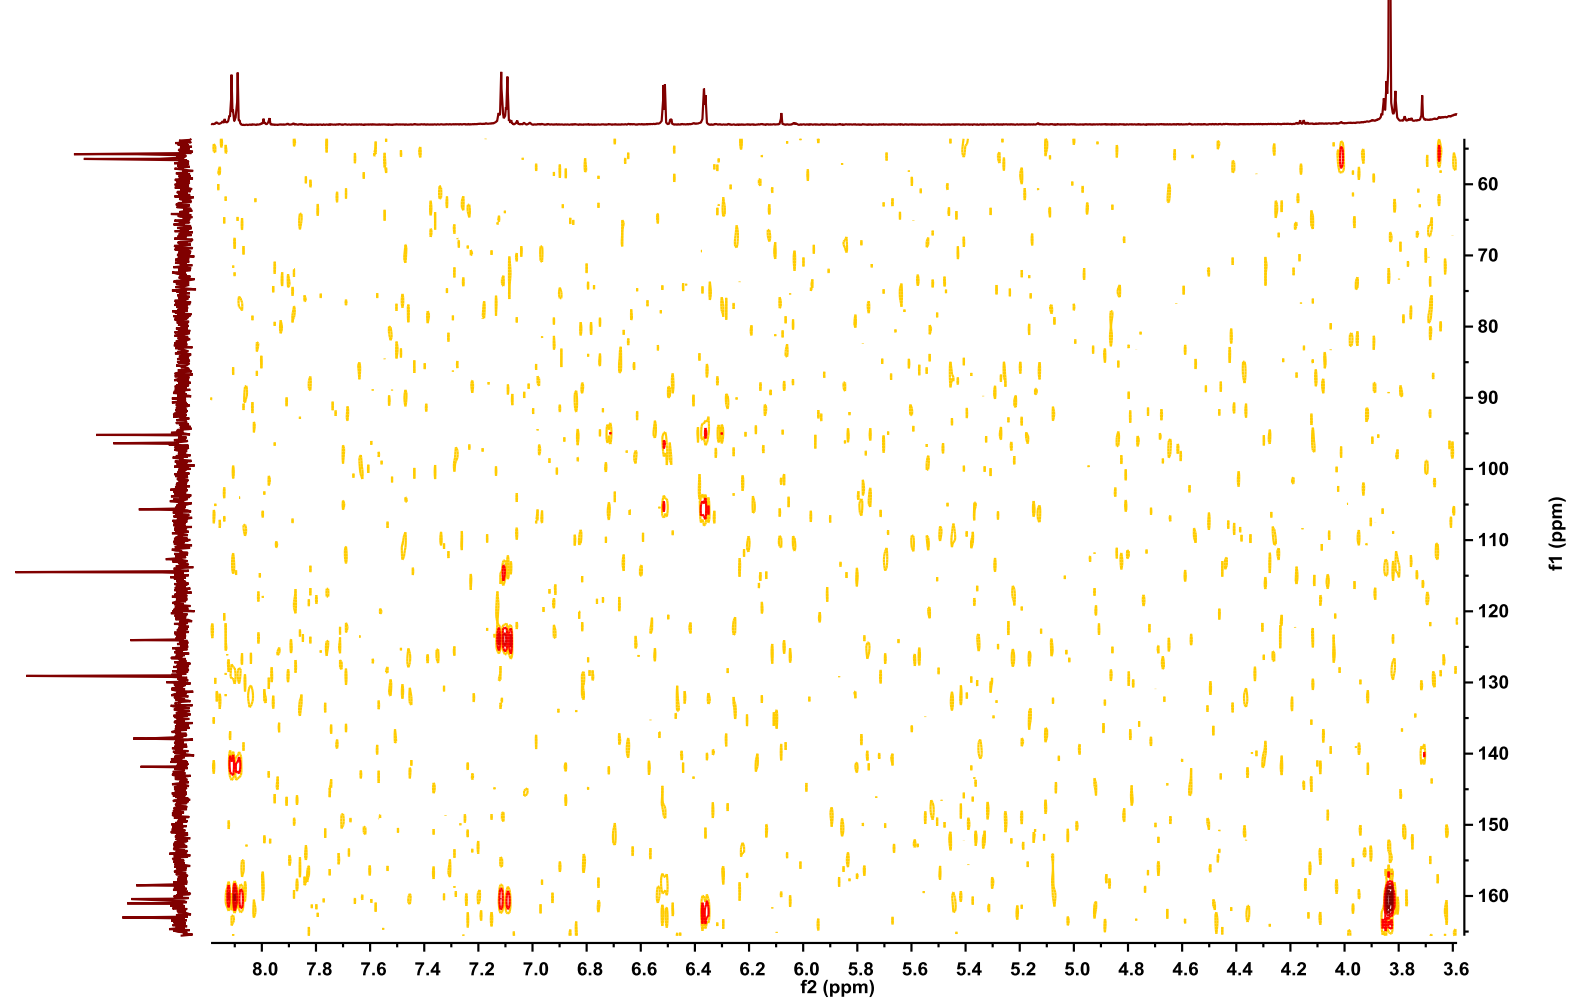

# HMBC Spectrum of Compound 18

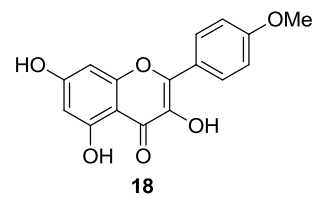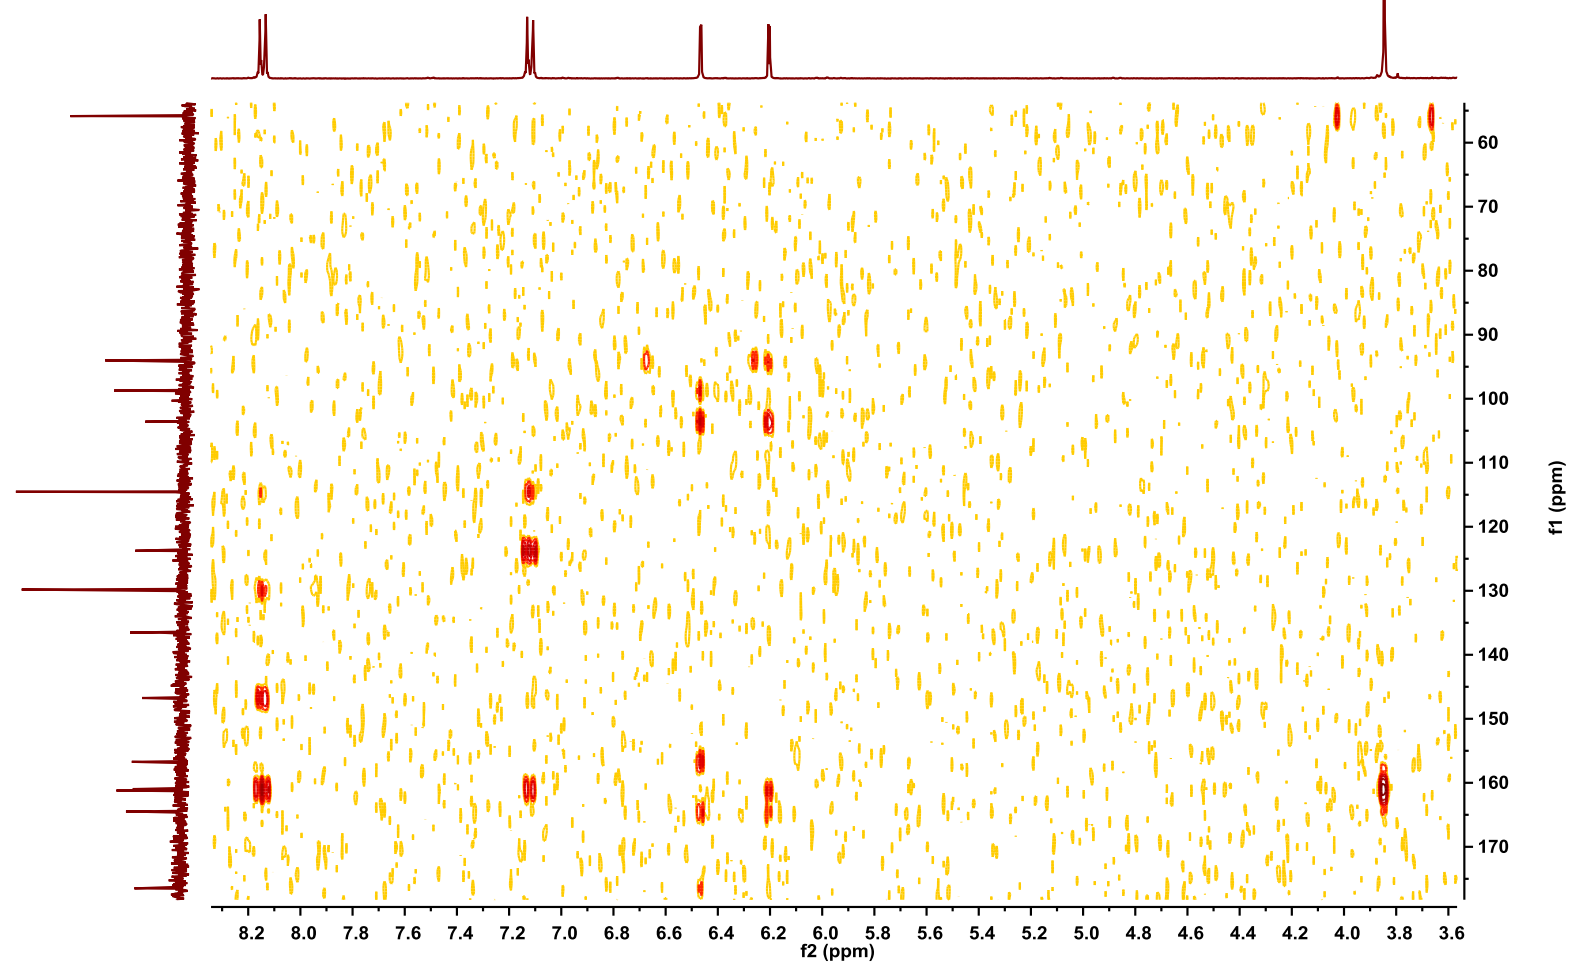

# HMBC Spectrum of Compound **22**

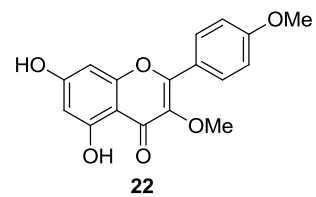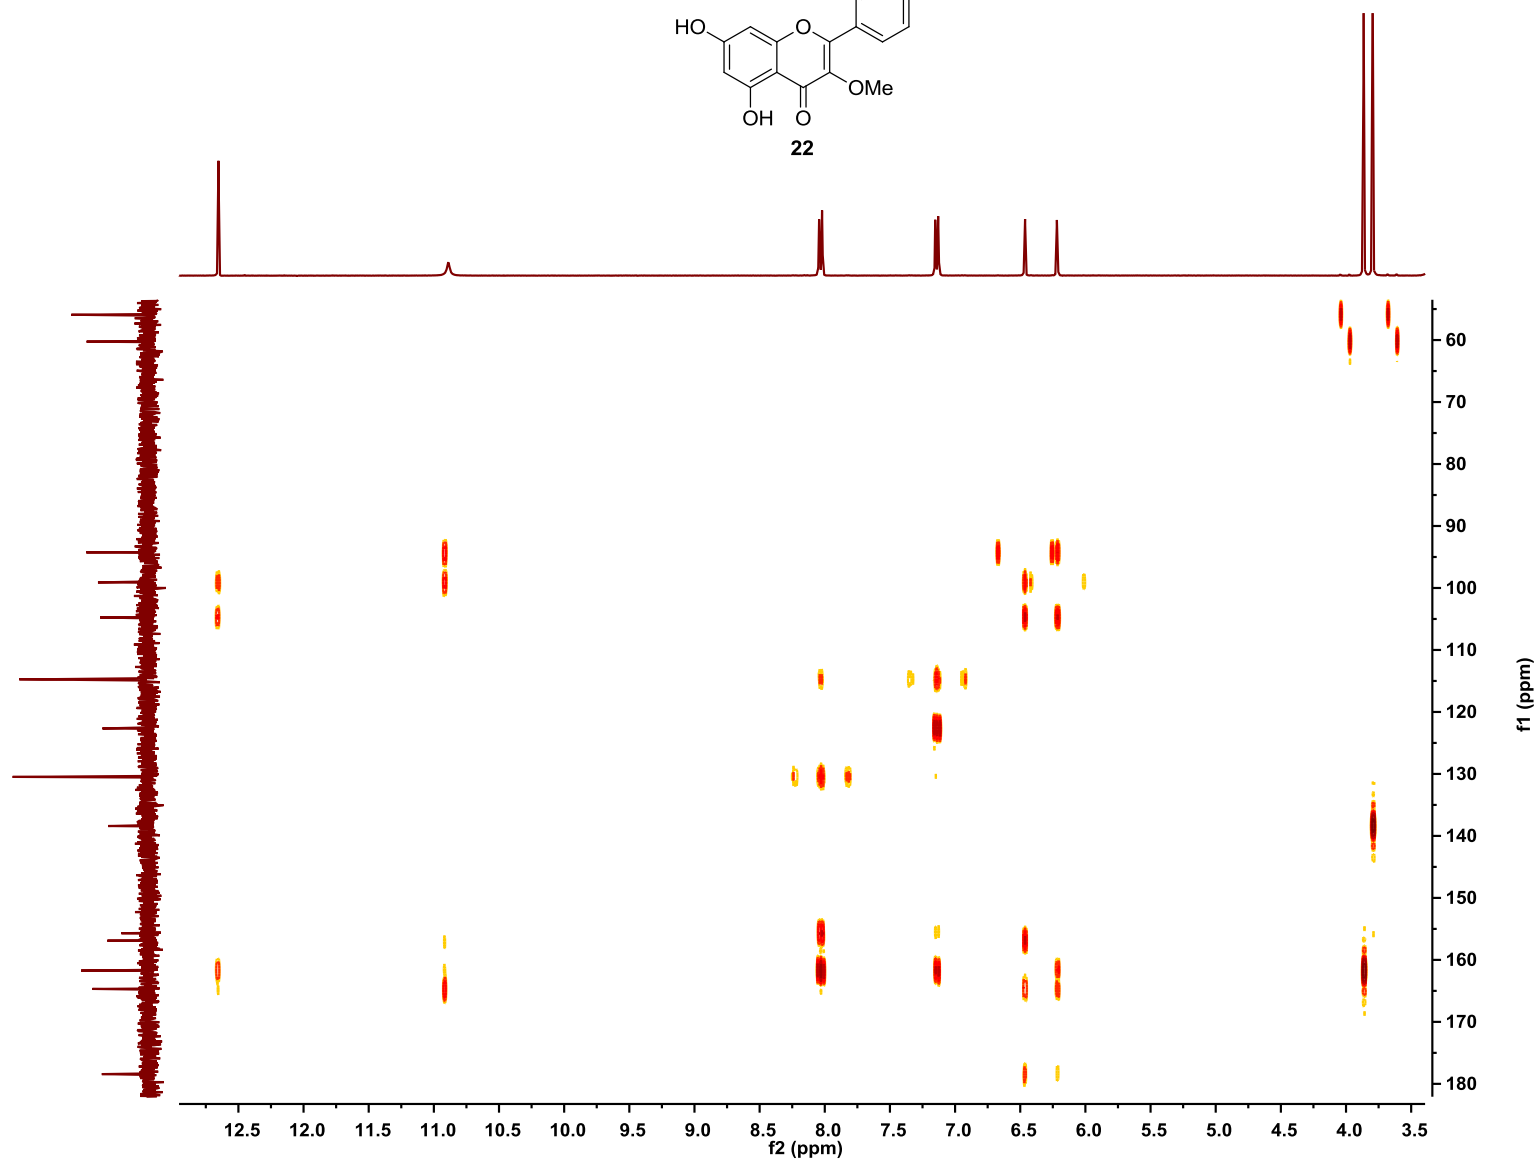

# HMBC Spectrum of Compound **23**

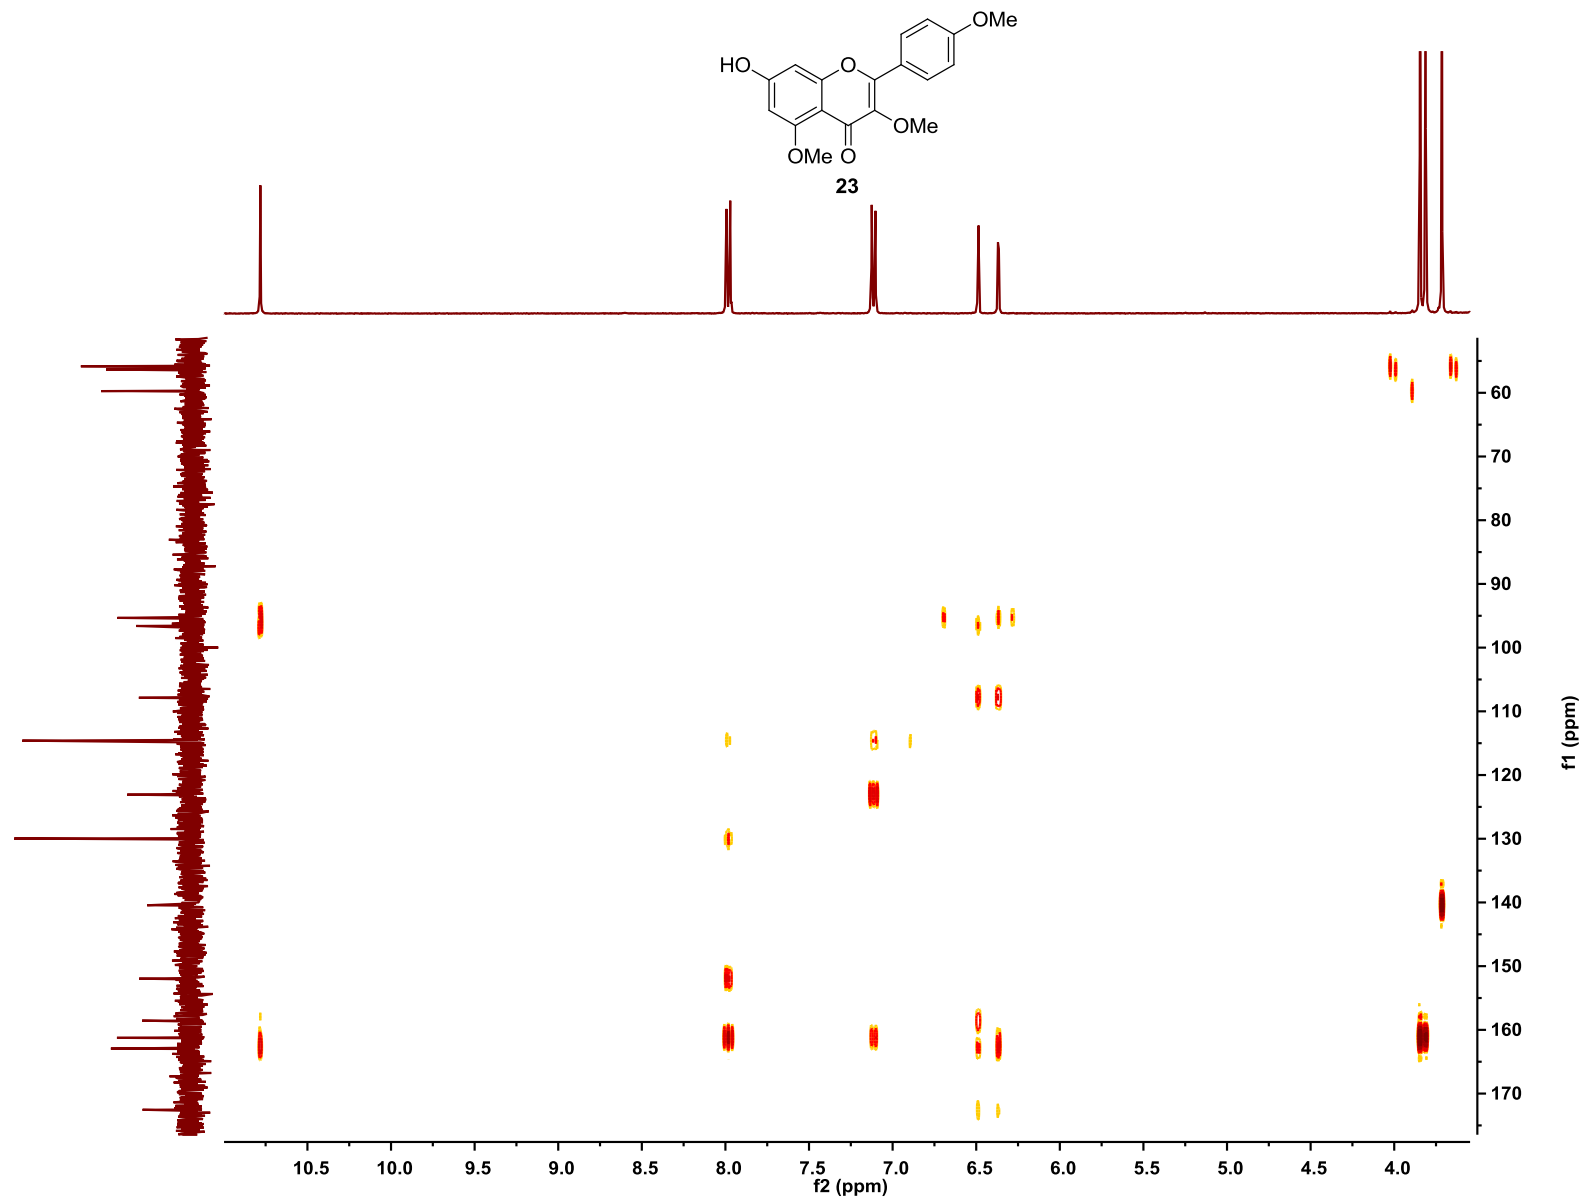

Supplement: Additional file 1 [file 1860-5397-11-33-S1.pdf]
